# Supplementary material for: Pd-Catalyzed 1,2-diarylation of vinylarenes at ambient temperature
Source: Royal Society of Chemistry journal article supplement (doi:10.1039/c7qo00097a), 2017-01-01
Supplement: c7qo00097a1.pdf [file c7qo00097a1.pdf]

# Electronic Supplementary Information

## *for*

### Pd-Catalyzed 1, 2-Diarylation of Vinylarenes at Ambient

### Temperature

Zhijie Kuang,<sup>†</sup> Kai Yang,<sup>†</sup> and Qiuling Song<sup>\*†‡</sup>

<sup>†</sup> Institute of Next Generation Matter Transformation, College of Chemical Engineering and College of Material Sciences Engineering at Huaqiao University, 668 Jimei Blvd, Xiamen, Fujian, 361021, P. R. China

<sup>‡</sup> National Laboratory for Molecular Sciences, Institute of Chemistry, CAS, Beijing, 100190, P. R. China

Fax: 86-592-6162990; email: [qsong@hqu.edu.cn](mailto:qsong@hqu.edu.cn)

### Table of Contents

|                                                                          |    |
|--------------------------------------------------------------------------|----|
| 1. General information.....                                              | 1  |
| 2. Optimization of experimental conditions.....                          | 2  |
| 3. General procedure for 1,2-diarylation of vinylarene derivatives. .... | 3  |
| 4. Preliminary mechanistic studies.....                                  | 28 |
| 5. NMR spectroscopic data .....                                          | 29 |
| 6. References.....                                                       | 75 |

**1. General information.** <sup>1</sup>H NMR and <sup>13</sup>C NMR spectra were recorded at ambient temperature using 500 MHz spectrometers. The data are reported as follows: chemical shift in ppm from internal tetramethylsilane on the  $\delta$  scale, multiplicity (br = broad, s = singlet, d = doublet, t = triplet, q = quartet, m = multiplet), coupling constants (Hz) and integration. High-resolution mass spectra were obtained by peak matching. All reactions were carried out under an atmosphere of nitrogen in glassware, which had been oven-dried. All reagents and solvents were purchased from commercial suppliers and used without further purification. Unless otherwise stated, all experiments were conducted in a Schlenk tube under N<sub>2</sub> atmosphere. Reactions were monitored by TLC or GC-MS analysis. Flash column chromatography was performed over silica gel (200-300 mesh).



## 2. Optimization of experimental conditions<sup>1</sup>

**Table S1. Condition Screening.<sup>a</sup>**

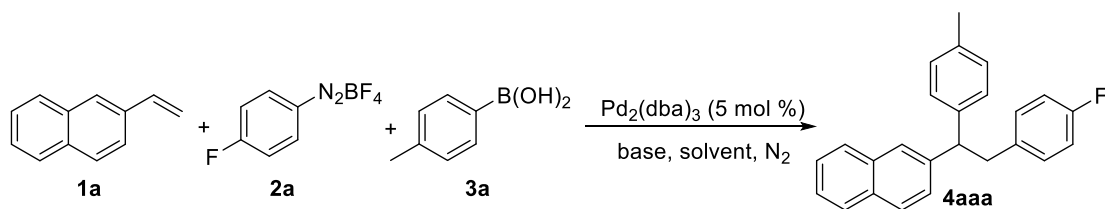

| entry           | base (2 equiv)           | solvent (1 mL) | temp (°C) | GC yield (%) <sup>b</sup> |
|-----------------|--------------------------|----------------|-----------|---------------------------|
| 1               | $\text{Na}_2\text{CO}_3$ | t-Amy-OH       | 60        | 59                        |
| 2               | $\text{K}_2\text{CO}_3$  | t-Amy-OH       | 60        | 67                        |
| 3               | $\text{Cs}_2\text{CO}_3$ | t-Amy-OH       | 60        | 70                        |
| 4               | KF                       | t-Amy-OH       | 60        | 53                        |
| 5               | NaOAc                    | t-Amy-OH       | 60        | trace                     |
| 6               | $\text{K}_3\text{PO}_4$  | t-Amy-OH       | 60        | 64                        |
| 7               | $\text{K}_2\text{HPO}_4$ | t-Amy-OH       | 60        | 59                        |
| 8               | $\text{KH}_2\text{PO}_4$ | t-Amy-OH       | 60        | 58                        |
| 9               | CsF                      | t-Amy-OH       | 60        | trace                     |
| 10 <sup>c</sup> | $\text{Cs}_2\text{CO}_3$ | t-Amy-OH       | RT        | trace                     |
| 11              | $\text{Cs}_2\text{CO}_3$ | t-Amy-OH       | RT        | 80                        |
| 12              | $\text{Cs}_2\text{CO}_3$ | MeOH           | RT        | trace                     |
| 13              | $\text{Cs}_2\text{CO}_3$ | dioxane        | RT        | trace                     |
| 14              | $\text{Cs}_2\text{CO}_3$ | toluene        | RT        | trace                     |
| 15              | $\text{Cs}_2\text{CO}_3$ | DMF            | RT        | no reaction               |
| 16              | $\text{Cs}_2\text{CO}_3$ | DCE            | RT        | trace                     |
| 17              | $\text{Cs}_2\text{CO}_3$ | THF            | RT        | no reaction               |
| 18              | $\text{Cs}_2\text{CO}_3$ | EtOH           | RT        | no reaction               |
| 19              | $\text{Cs}_2\text{CO}_3$ | t-BuOH         | RT        | no reaction               |
| 20              | $\text{Cs}_2\text{CO}_3$ | EA             | RT        | no reaction               |

[a] Reaction conditions: all reactions were ran on 0.2 mmol scale with respect to **1a**.

[b] Yields determined by GC by utilizing dodecane as internal standard, figures in brackets represent separation yield. t-Amy-OH = tert-amyl alcohol. [c] under air.

### byproducts

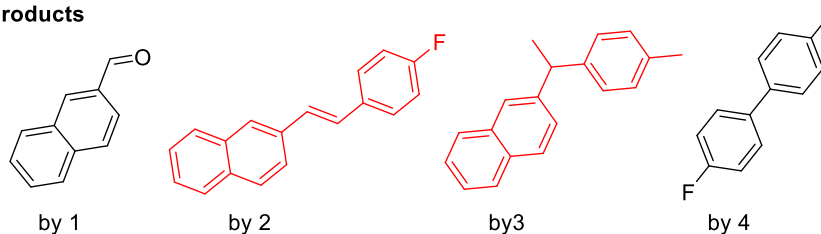



**Table S1. Base screening.<sup>a</sup>**
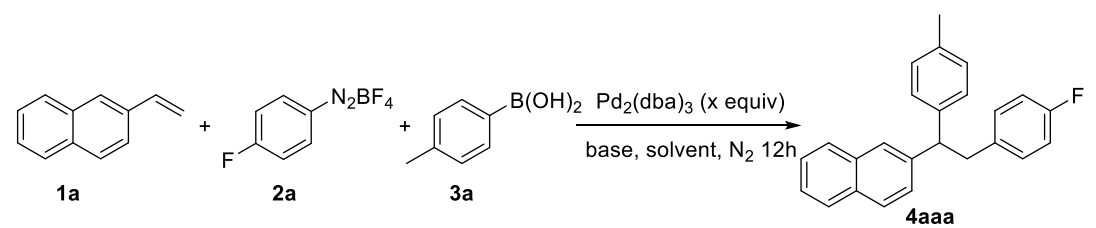

| entry     | <b>1a</b> (equiv) | <b>2a</b> (equiv) | Pd (equiv)  | base (equiv)                            | solvent (1 mL)         | temp (°C) | yield (%) <sup>b</sup> |
|-----------|-------------------|-------------------|-------------|-----------------------------------------|------------------------|-----------|------------------------|
| 21        | 1.0               | 1.5               | 0.05        | Cs <sub>2</sub> CO <sub>3</sub> 2.0     | <i>t</i> -Amy-OH       | rt        | 81                     |
| 22        | 1.0               | 1.1               | 0.05        | Cs <sub>2</sub> CO <sub>3</sub> 2.0     | <i>t</i> -Amy-OH       | rt        | 64                     |
| <b>23</b> | <b>1.0</b>        | <b>1.2</b>        | <b>0.05</b> | <b>Cs<sub>2</sub>CO<sub>3</sub> 2.0</b> | <b><i>t</i>-Amy-OH</b> | <b>rt</b> | <b>80 (70)</b>         |
| 24        | 1.0               | 1.2               | 0.05        | Cs <sub>2</sub> CO <sub>3</sub> 1.5     | <i>t</i> -Amy-OH       | rt        | 73                     |
| 25        | 1.0               | 1.2               | 0.05        | Cs <sub>2</sub> CO <sub>3</sub> 1.2     | <i>t</i> -Amy-OH       | rt        | 77                     |
| 26        | 1.0               | 1.2               | 0.05        | Cs <sub>2</sub> CO <sub>3</sub> 1.0     | <i>t</i> -Amy-OH       | rt        | 68                     |
| <b>27</b> | <b>1.0</b>        | <b>1.2</b>        | <b>0.05</b> | <b>Li<sub>2</sub>CO<sub>3</sub> 1.2</b> | <b><i>t</i>-Amy-OH</b> | <b>rt</b> | <b>92 (82)</b>         |
| 28        | 1.2               | 1.2               | 0.05        | Li <sub>2</sub> CO <sub>3</sub> 1.2     | <i>t</i> -Amy-OH       | rt        | 88 (79)                |
| 29        | 1.0               | 1.2               | 0.05        | Li <sub>2</sub> CO <sub>3</sub> 1.2     | <i>t</i> -Amy-OH       | 0         | 84                     |
| 30        | 1.0               | 1.2               | 0.03        | Li <sub>2</sub> CO <sub>3</sub> 1.2     | <i>t</i> -Amy-OH       | rt        | 70                     |
| 31        | 1.0               | 1.2               | 0.01        | Li <sub>2</sub> CO <sub>3</sub> 1.2     | <i>t</i> -Amy-OH       | rt        | 30                     |

[a] Reaction conditions: all reactions were run on 0.2 mmol scale with respect to **1a**. [b] Yields determined by GC by utilizing dodecane as internal standard, figures in brackets represent separation yield. *t*-Amy-OH = tert-amyl alcohol.

### 3. General procedure for 1,2-diarylation of vinylnaphthalene derivatives.

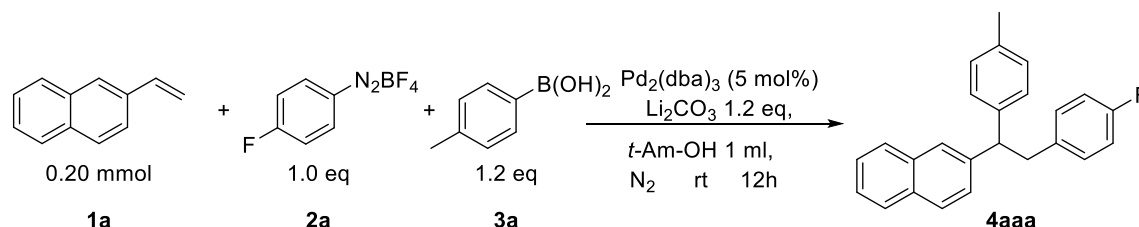

To a 25 mL Schlenk tube, under a nitrogen atmosphere, was added 0.20 mmol of 2-vinylnaphthalene (**1a**) followed by 0.20 mmol of 4-fluorophenyldiazonium tetrafluoroborate (**2a**) (1.0 equiv), 0.24 mmol of p-tolylboronic acid (**3a**) (1.2 equiv), 0.01 mmol of Pd<sub>2</sub>(dba)<sub>3</sub> (0.05 equiv), 0.24 mmol of lithium carbonate (1.2 equiv), in 1.0 mL of *t*-Amy-OH. The Schlenk tube was sealed and stirred at rt. After 12 h, the reaction mixture was extracted water/EA. Then the organic layers were dried with Na<sub>2</sub>SO<sub>4</sub>, and concentrated to dryness. The crude product was purified by silica gel chromatography (silica gel, PE: EA = 120:1 – 80:1, v/v) to afford the product **4aaa** as a slight yellow solid.



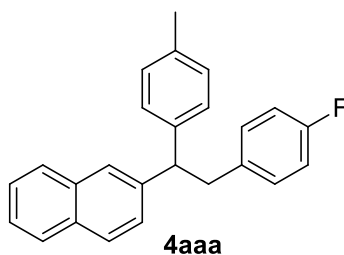

**2-(2-(4-fluorophenyl)-1-(p-tolylethyl)naphthalene (4aaa).** The optimized procedure was followed by using 30.8 mg of 2-vinylnaphthalene (**1a**) (0.20 mmol), 42.0 mg of 4-fluorophenyldiazonium tetrafluoroborate (**2a**) (0.20 mmol), 32.6 mg of p-tolylboronic acid (**3a**) (0.24 mmol), 9.2 mg of Pd<sub>2</sub>(dba)<sub>3</sub> (0.01 mmol), 17.8 mg of lithium carbonate (0.24 mmol) and 1 mL of *t*-Amy-OH and stirred at rt. After 12 h, the reaction mixture was extracted water/EA. Then the organic layers were dried with Na<sub>2</sub>SO<sub>4</sub>, and concentrated to dryness. The crude product was purified by silica gel chromatography (silica gel, PE: EA = 100:1, v/v) to afford 56.2 mg of the product as a slight yellow solid (82%). <sup>1</sup>H NMR (500 MHz, CDCl<sub>3</sub>) δ 7.78 (t, *J* = 7.8 Hz, 2H), 7.74 (d, *J* = 8.5 Hz, 1H), 7.65 (s, 1H), 7.48 – 7.41 (m, 2H), 7.33 (d, *J* = 8.5 Hz, 1H), 7.14 (d, *J* = 7.8 Hz, 2H), 7.08 (d, *J* = 7.8 Hz, 2H), 7.01 – 6.95 (m, 2H), 6.86 (t, *J* = 8.7 Hz, 2H), 4.32 (t, *J* = 7.8 Hz, 1H), 3.48–3.39 (m, 2H), 2.31 (s, 3H). <sup>13</sup>C NMR (125 MHz, CDCl<sub>3</sub>) δ 161.2 (d, *J* = 242.0 Hz), 141.8, 141.0, 135.9 (d, *J* = 3.3 Hz), 135.8, 133.4, 132.1, 130.4 (d, *J* = 7.8 Hz), 129.1, 128.0, 127.9, 127.7, 127.5, 126.8, 126.0 (d, *J* = 11.4 Hz), 125.4, 114.9, 114.7, 52.9, 41.1, 21.0. <sup>19</sup>F NMR (471 MHz, CDCl<sub>3</sub>) δ -117.4. HRMS (EI) *m/z*: calcd for: C<sub>25</sub>H<sub>21</sub>F:340.1627; Found: 340.1633.

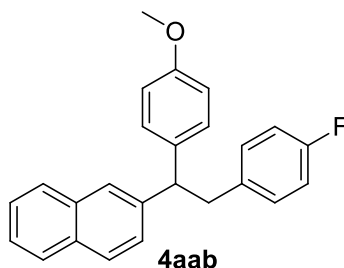

**2-(2-(4-fluorophenyl)-1-(4-methoxyphenyl)ethyl)naphthalene (4aab).** The optimized procedure was followed by using 30.8 mg of 2-vinylnaphthalene (**1a**) (0.20 mmol), 42.0 mg of 4-fluorophenyldiazonium tetrafluoroborate (**2a**) (0.20 mmol), 36.5 mg of (4-methoxyphenyl)boronic acid (**3b**) (0.24 mmol), 9.2 mg of Pd<sub>2</sub>(dba)<sub>3</sub> (0.01 mmol), 17.8 mg of lithium carbonate (0.24 mmol) and 1 mL of *t*-Amy-OH and stirred at rt. After 12 h, the reaction mixture was extracted water/EA. Then the organic layers were dried with Na<sub>2</sub>SO<sub>4</sub>, and concentrated to dryness. The crude product was purified by silica gel chromatography (silica gel, PE: EA = 50:1, v/v) to afford 51.9 mg of the product as a bronzing oil (73%). <sup>1</sup>H NMR (500 MHz, CDCl<sub>3</sub>) δ 7.78 (t, *J* = 7.8 Hz, 2H), 7.74 (d, *J* = 8.5 Hz, 1H), 7.65 (s, 1H), 7.48 – 7.41 (m, 2H), 7.31 (d, *J* = 8.5 Hz, 1H), 7.14 (d, *J* = 8.4 Hz, 2H), 7.00 – 6.94 (m, 2H), 6.85 (t, *J* = 8.4 Hz, 2H), 6.81 (d, *J* = 8.7 Hz, 2H), 4.30 (t, *J* = 7.8 Hz, 1H), 3.77 (s, 3H), 3.41 (qd, *J* = 13.6, 7.8 Hz, 2H). <sup>13</sup>C NMR (125 MHz, CDCl<sub>3</sub>) δ 161.2 (d, *J* = 242.1 Hz), 158.0, 142.0, 136.1, 135.9 (d, *J* = 3.2 Hz), 133.4, 132.1, 130.4 (d, *J* = 7.7 Hz), 129.0, 128.0, 127.7, 127.5, 126.8, 125.9 (d, *J* = 8.3 Hz), 125.4, 114.9, 114.7, 113.7, 55.2, 52.4, 41.2. <sup>19</sup>F NMR (471 MHz, CDCl<sub>3</sub>) δ -117.4. HRMS (EI) *m/z*: calcd for: C<sub>25</sub>H<sub>21</sub>FO: 356.1576; Found: 356.1569.



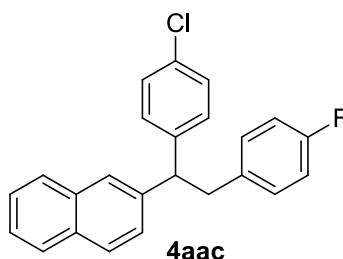

**2-(1-(4-chlorophenyl)-2-(4-fluorophenyl)ethyl)naphthalene (4aac).** The optimized procedure was followed by using 30.8 mg of 2-vinylnaphthalene (**1a**) (0.20 mmol), 42.0 mg of 4-fluorophenyldiazonium tetrafluoroborate (**2a**) (0.20 mmol), 37.5 mg of (4-chlorophenyl)boronic acid (**3c**) (0.24 mmol), 9.2 mg of Pd<sub>2</sub>(dba)<sub>3</sub> (0.01 mmol), 17.8 mg of lithium carbonate (0.24 mmol) and 1 mL of *t*-Amy-OH and stirred at rt. After 12 h, the reaction mixture was extracted water/EA. Then the organic layers were dried with Na<sub>2</sub>SO<sub>4</sub>, and concentrated to dryness. The crude product was purified by silica gel chromatography (silica gel, PE: EA = 80:1, v/v) to afford 51.9 mg of the product as a slight yellow solid (70%). <sup>1</sup>H NMR (500 MHz, CDCl<sub>3</sub>) δ 7.79 (dd, *J* = 8.8, 7.9 Hz, 2H), 7.75 (d, *J* = 8.5 Hz, 1H), 7.65 (s, 1H), 7.50 – 7.43 (m, 2H), 7.28 (dd, *J* = 8.5, 1.4 Hz, 1H), 7.23 (d, *J* = 8.4 Hz, 2H), 7.14 (t, *J* = 7.5 Hz, 2H), 6.96 (dt, *J* = 8.1, 5.9 Hz, 2H), 6.87 (t, *J* = 8.7 Hz, 2H), 4.32 (t, *J* = 7.8 Hz, 1H), 3.46 (dd, *J* = 13.6, 7.4 Hz, 1H), 3.36 (dd, *J* = 13.6, 8.3 Hz, 1H). <sup>13</sup>C NMR (125 MHz, CDCl<sub>3</sub>) δ 161.3 (d, *J* = 242.4 Hz), 142.5, 141.1, 135.4 (d, *J* = 3.2 Hz), 133.4, 132.2, 132.1, 130.4 (d, *J* = 7.8 Hz), 129.5, 128.5, 128.2, 127.7, 127.6, 126.6, 126.0 (d, *J* = 18.0 Hz), 125.7, 115.0, 114.9, 52.6, 41.0. <sup>19</sup>F NMR (471 MHz, CDCl<sub>3</sub>) δ -117.0. HRMS (EI) *m/z*: calcd for: C<sub>24</sub>H<sub>18</sub>ClF: 360.1081; Found: 360.1085.

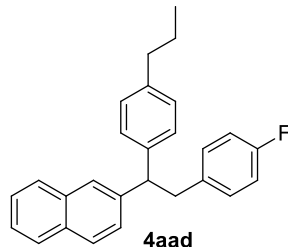

**2-(2-(4-fluorophenyl)-1-(4-propylphenyl)ethyl)naphthalene (4aad).** The optimized procedure was followed by using 30.8 mg of 2-vinylnaphthalene (**1a**) (0.20 mmol), 42.0 mg of 4-fluorophenyldiazonium tetrafluoroborate (**2a**) (0.20 mmol), 39.4 mg of (4-propylphenyl)boronic acid (**3d**) (0.24 mmol), 9.2 mg of Pd<sub>2</sub>(dba)<sub>3</sub> (0.01 mmol), 17.8 mg of lithium carbonate (0.24 mmol) and 1 mL of *t*-Amy-OH and stirred at rt. After 12 h, the reaction mixture was extracted water/EA. Then the organic layers were dried with Na<sub>2</sub>SO<sub>4</sub>, and concentrated to dryness. The crude product was purified by silica gel chromatography (silica gel, PE: EA = 100:1, v/v) to afford 52.5 mg of the product as a slight yellow solid (71%). <sup>1</sup>H NMR (500 MHz, CDCl<sub>3</sub>) δ 7.81 (t, *J* = 7.5 Hz, 2H), 7.77 (d, *J* = 8.6 Hz, 1H), 7.68 (s, 1H), 7.50 – 7.43 (m, 2H), 7.37 (d, *J* = 8.5 Hz, 1H), 7.19 (d, *J* = 7.5 Hz, 2H), 7.12 (d, *J* = 7.3 Hz, 2H), 7.02 – 6.96 (m, 2H), 6.88 (t, *J* = 8.2 Hz, 2H), 4.35 (t, *J* = 7.8 Hz, 1H), 3.52 – 3.40 (m, 2H), 2.58 (t, *J* = 7.6 Hz, 2H), 1.70 – 1.61 (m, 2H), 0.97 (t, *J* = 7.3 Hz, 3H). <sup>13</sup>C NMR (125 MHz, CDCl<sub>3</sub>) δ 161.2 (d, *J* = 242.0 Hz), 141.8, 141.3, 140.6, 135.9 (d, *J* = 3.1 Hz), 133.4, 132.1, 130.4 (d, *J* = 7.8 Hz), 128.5, 128.0, 127.8, 127.7, 127.5, 126.8, 126.0 (d, *J* = 23.4 Hz), 125.4, 114.9, 114.7, 52.9, 41.1, 37.6, 24.5, 13.8. <sup>19</sup>F NMR (471 MHz, CDCl<sub>3</sub>) δ -117.5. HRMS (EI) *m/z*: calcd for: C<sub>27</sub>H<sub>25</sub>F: 368.1940; Found: 368.1937.



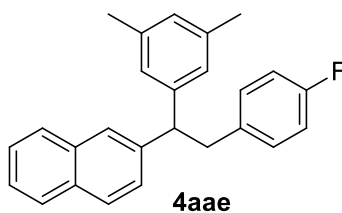

**2-(1-(3,5-dimethylphenyl)-2-(4-fluorophenyl)ethyl)naphthalene (4aae).** The optimized procedure was followed by using 30.8 mg of 2-vinylnaphthalene (**1a**) (0.20 mmol), 42.0 mg of 4-fluorophenyldiazonium tetrafluoroborate (**2a**) (0.20 mmol), 39.4 mg of (3, 5-dimethylphenyl)boronic acid (**3e**) (0.24 mmol), 9.2 mg of Pd<sub>2</sub>(dba)<sub>3</sub> (0.01 mmol), 17.8 mg of lithium carbonate (0.24 mmol) and 1 mL of *t*-Amy-OH and stirred at rt. After 12 h, the reaction mixture was extracted water/EA. Then the organic layers were dried with Na<sub>2</sub>SO<sub>4</sub>, and concentrated to dryness. The crude product was purified by silica gel chromatography (silica gel, PE: EA = 100:1, v/v) to afford 54.4 mg of the product as a yellow oil (77%). <sup>1</sup>H NMR (500 MHz, CDCl<sub>3</sub>) δ 7.78 (dd, *J* = 8.8, 7.1 Hz, 2H), 7.74 (d, *J* = 8.5 Hz, 1H), 7.64 (s, 1H), 7.48 – 7.41 (m, 2H), 7.34 (dd, *J* = 8.5, 1.7 Hz, 1H), 7.01 – 6.95 (m, 2H), 6.89 (s, 2H), 6.85 (dd, *J* = 11.9, 5.5 Hz, 3H), 4.28 (t, *J* = 7.8 Hz, 1H), 3.48 – 3.39 (m, 2H), 2.28 (s, 6H). <sup>13</sup>C NMR (125 MHz, CDCl<sub>3</sub>) δ 161.2 (d, *J* = 242.0 Hz), 144.1, 141.7, 137.8, 136.0 (d, *J* = 3.2 Hz), 133.4, 132.1, 130.4 (d, *J* = 7.8 Hz), 128.0 (d, *J* = 6.4 Hz), 127.7, 127.5, 126.8, 126.2, 125.9, 125.4, 114.9, 114.7, 53.2, 41.1, 21.4. <sup>19</sup>F NMR (471 MHz, CDCl<sub>3</sub>) δ -117.6. HRMS (EI) *m/z*: calcd for: C<sub>26</sub>H<sub>23</sub>F: 354.1784; Found: 354.1790.

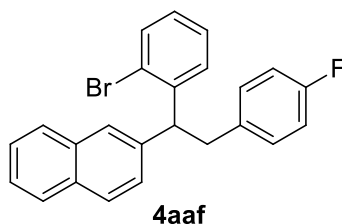

**2-(1-(2-bromophenyl)-2-(4-fluorophenyl)ethyl)naphthalene (4aaf).** The optimized procedure was followed by using 30.8 mg of 2-vinylnaphthalene (**1a**) (0.20 mmol), 42.0 mg of 4-fluorophenyldiazonium tetrafluoroborate (**2a**) (0.20 mmol), 48.0 mg of (2-bromophenyl)boronic acid (**3f**) (0.24 mmol), 9.2 mg of Pd<sub>2</sub>(dba)<sub>3</sub> (0.01 mmol), 17.8 mg of lithium carbonate (0.24 mmol) and 1 mL of *t*-Amy-OH and stirred at rt. After 12 h, the reaction mixture was extracted water/EA. Then the organic layers were dried with Na<sub>2</sub>SO<sub>4</sub>, and concentrated to dryness. The crude product was purified by silica gel chromatography (silica gel, PE: EA = 100:1, v/v) to afford 54.4 mg of the product as a slight bronzing solid (62%). <sup>1</sup>H NMR (500 MHz, CDCl<sub>3</sub>) δ 7.80 (dd, *J* = 7.9, 6.6 Hz, 2H), 7.76 (d, *J* = 8.5 Hz, 1H), 7.72 (s, 1H), 7.55 (dd, *J* = 8.0, 1.1 Hz, 1H), 7.50 – 7.43 (m, 2H), 7.41 (dd, *J* = 7.8, 1.5 Hz, 1H), 7.36 (dd, *J* = 8.5, 1.7 Hz, 1H), 7.32 – 7.27 (m, 1H), 7.07 (dd, *J* = 11.1, 5.5 Hz, 3H), 6.92 – 6.85 (m, 2H), 4.99 (t, *J* = 7.8 Hz, 1H), 3.43 (qd, *J* = 13.9, 7.8 Hz, 2H). <sup>13</sup>C NMR (125 MHz, CDCl<sub>3</sub>) δ 161.3 (d, *J* = 242.4 Hz), 143.1, 139.9, 135.2 (d, *J* = 3.2 Hz), 133.3, 133.0, 132.2, 130.4 (d, *J* = 7.8 Hz), 129.2, 127.9 (d, *J* = 4.5 Hz), 127.8, 127.6 (d, *J* = 1.4 Hz), 127.1, 126.6, 126.0, 125.6, 125.3, 115.0, 114.8, 51.0, 40.7. <sup>19</sup>F NMR (471 MHz, CDCl<sub>3</sub>) δ -117.1. HRMS (EI) *m/z*: calcd for: C<sub>24</sub>H<sub>18</sub>BrF: 404.0576; Found: 404.0580.



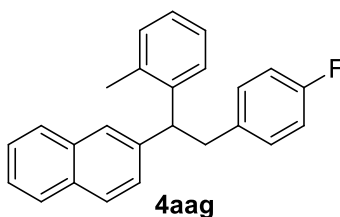

**2-(2-(4-fluorophenyl)-1-(o-tolyl)ethyl)naphthalene (4aag).** The optimized procedure was followed by using 30.8 mg of 2-vinylnaphthalene (**1a**) (0.20 mmol), 42.0 mg of 4-fluorophenyldiazonium tetrafluoroborate (**2a**) (0.20 mmol), 32.6 mg of (2-tolylphenyl)boronic acid (**3g**) (0.24 mmol), 9.2 mg of Pd<sub>2</sub>(dba)<sub>3</sub> (0.01 mmol), 17.8 mg of lithium carbonate (0.24 mmol) and 1 mL of *t*-Amy-OH and stirred at rt. After 12 h, the reaction mixture was extracted water/EA. Then the organic layers were dried with Na<sub>2</sub>SO<sub>4</sub>, and concentrated to dryness. The crude product was purified by silica gel chromatography (silica gel, PE: EA = 100:1, v/v) to afford 54.4 mg of the product as a yellow solid (76%). <sup>1</sup>H NMR (500 MHz, CDCl<sub>3</sub>) δ 7.79 – 7.76 (m, 1H), 7.74 – 7.71 (m, 1H), 7.70 (d, *J* = 8.5 Hz, 1H), 7.54 (s, 1H), 7.46 – 7.40 (m, 3H), 7.22 (ddd, *J* = 9.6, 8.5, 4.5 Hz, 2H), 7.14 (td, *J* = 7.4, 1.2 Hz, 1H), 7.09 (d, *J* = 6.7 Hz, 1H), 6.96 – 6.90 (m, 2H), 6.85 (t, *J* = 8.7 Hz, 2H), 4.52 (t, *J* = 7.7 Hz, 1H), 3.45 – 3.36 (m, 2H), 2.14 (s, 3H). <sup>13</sup>C NMR (125 MHz, CDCl<sub>3</sub>) δ 161.3 (d, *J* = 241.1 Hz), 142.1, 141.1, 136.4, 135.9 (d, *J* = 3.2 Hz), 133.3, 132.0, 130.5 (d, *J* = 2.5 Hz), 130.4, 127.8, 127.7, 127.5, 127.1 (d, *J* = 5.2 Hz), 126.4, 126.3, 126.1, 125.9, 125.4, 114.9, 114.7, 48.9, 41.5, 19.8. <sup>19</sup>F NMR (471 MHz, CDCl<sub>3</sub>) δ -117.3. HRMS (EI) *m/z*: calcd for: C<sub>25</sub>H<sub>21</sub>F: 340.1627; Found: 340.1614.

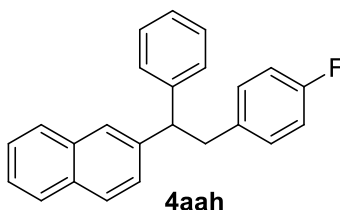

**2-(2-(4-fluorophenyl)-1-phenylethyl)naphthalene (4aah).** The optimized procedure was followed by using 30.8 mg of 2-vinylnaphthalene (**1a**) (0.20 mmol), 42.0 mg of 4-fluorophenyldiazonium tetrafluoroborate (**2a**) (0.20 mmol), 29.3 mg of boronic acid (**3h**) (0.24 mmol), 9.2 mg of Pd<sub>2</sub>(dba)<sub>3</sub> (0.01 mmol), 17.8 mg of lithium carbonate (0.24 mmol) and 1 mL of *t*-Amy-OH and stirred at rt. After 12 h, the reaction mixture was extracted water/EA. Then the organic layers were dried with Na<sub>2</sub>SO<sub>4</sub>, and concentrated to dryness. The crude product was purified by silica gel chromatography (silica gel, PE: EA = 100:1, v/v) to afford 44.5 mg of the product as a yellow oil (68%). <sup>1</sup>H NMR (500 MHz, CDCl<sub>3</sub>) δ 7.81 (t, *J* = 7.3 Hz, 2H), 7.77 (d, *J* = 8.5 Hz, 1H), 7.69 (s, 1H), 7.50 – 7.43 (m, 2H), 7.35 (dd, *J* = 8.5, 1.6 Hz, 1H), 7.32 – 7.28 (m, 2H), 7.27 (dd, *J* = 6.6, 1.2 Hz, 2H), 7.24 – 7.19 (m, 1H), 7.02 – 6.96 (m, 2H), 6.87 (dd, *J* = 12.1, 5.2 Hz, 2H), 4.38 (t, *J* = 7.8 Hz, 1H), 3.47 (qd, *J* = 13.7, 7.9 Hz, 2H). <sup>13</sup>C NMR (125 MHz, CDCl<sub>3</sub>) δ 161.6 (d, *J* = 242.3 Hz), 144.0, 141.6, 135.8 (d, *J* = 3.2 Hz), 133.4, 132.1, 130.4 (d, *J* = 7.8 Hz), 128.4, 128.1, 128.0, 127.7, 127.5, 126.8, 126.3, 126.0 (d, *J* = 12.9 Hz), 125.5, 114.9, 114.7, 53.3, 41.0. <sup>19</sup>F NMR (471 MHz, CDCl<sub>3</sub>) δ -117.4. HRMS (EI) *m/z*: calcd for: C<sub>24</sub>H<sub>19</sub>F: 326.1471; Found: 326.1459.



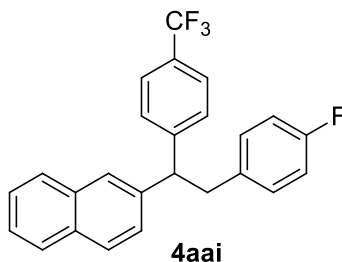

**2-(2-(4-fluorophenyl)-1-(4-(trifluoromethyl)phenyl)ethyl)naphthalene (4aai).** The optimized procedure was followed by using 30.8 mg of 2-vinylnaphthalene (**1a**) (0.20 mmol), 42.0 mg of 4-fluorophenyldiazonium tetrafluoroborate (**2a**) (0.20 mmol), 45.6 mg of (4-(trifluoromethyl)phenyl)boronic acid (**3i**) (0.24 mmol), 9.2 mg of Pd<sub>2</sub>(dba)<sub>3</sub> (0.01 mmol), 17.8 mg of lithium carbonate (0.24 mmol) and 1 mL of *t*-Amy-OH and stirred at rt. After 12 h, the reaction mixture was extracted water/EA. Then the organic layers were dried with Na<sub>2</sub>SO<sub>4</sub>, and concentrated to dryness. The crude product was purified by silica gel chromatography (silica gel, PE: EA = 80:1, v/v) to afford 49.5 mg of the product as a bronzing solid (63 %). <sup>1</sup>H NMR (500 MHz, CDCl<sub>3</sub>) δ 7.83 (ddd, *J* = 15.3, 9.3, 5.2 Hz, 2H), 7.77 (d, *J* = 8.6 Hz, 1H), 7.68 (s, 1H), 7.51 (dd, *J* = 8.4, 4.9 Hz, 2H), 7.49 – 7.44 (m, 2H), 7.33 (d, *J* = 8.1 Hz, 2H), 7.29 (dd, *J* = 8.5, 1.8 Hz, 1H), 7.00 – 6.95 (m, 2H), 6.91 – 6.84 (m, 2H), 4.41 (t, *J* = 7.8 Hz, 1H), 3.51 (dd, *J* = 13.7, 7.6 Hz, 1H), 3.41 (dd, *J* = 13.7, 8.1 Hz, 1H). <sup>13</sup>C NMR (125 MHz, CDCl<sub>3</sub>) δ 161.3 (d, *J* = 242.9 Hz), 148.1, 140.5, 135.1 (d, *J* = 3.3 Hz), 133.4, 132.3, 130.4 (d, *J* = 7.9 Hz), 128.4, 128.3, 127.7, 127.6, 126.5, 126.2 (d, *J* = 5.7 Hz), 125.8, 125.3 (q, *J* = 3.7 Hz), 115.1, 115.0, 53.1, 40.8. <sup>19</sup>F NMR (471 MHz, CDCl<sub>3</sub>) δ -62.3, -116.9. HRMS, *m/z*: calcd for: C<sub>25</sub>H<sub>18</sub>F<sub>4</sub>: 394.1345; Found: 394.1335.

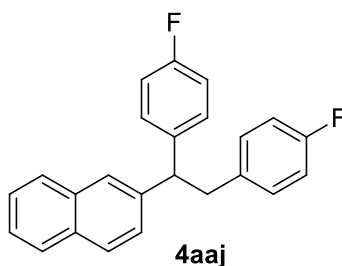

**2-(1,2-bis(4-fluorophenyl)ethyl)naphthalene (4aaj).** The optimized procedure was followed by using 30.8 mg of 2-vinylnaphthalene (**1a**) (0.20 mmol), 42.0 mg of 4-fluorophenyldiazonium tetrafluoroborate (**2a**) (0.20 mmol), 33.6 mg of (4-fluorophenyl)boronic acid (**3j**) (0.24 mmol), 9.2 mg of Pd<sub>2</sub>(dba)<sub>3</sub> (0.01 mmol), 17.8 mg of lithium carbonate (0.24 mmol) and 1 mL of *t*-Amy-OH and stirred at rt. After 12 h, the reaction mixture was extracted water/EA. Then the organic layers were dried with Na<sub>2</sub>SO<sub>4</sub>, and concentrated to dryness. The crude product was purified by silica gel chromatography (silica gel, PE: EA = 100:1, v/v) to afford 55.1 mg of the product as a yellow solid (80%). <sup>1</sup>H NMR (500 MHz, CDCl<sub>3</sub>) δ 7.79 (t, *J* = 7.7 Hz, 2H), 7.75 (d, *J* = 8.6 Hz, 1H), 7.66 (s, 1H), 7.46 (p, *J* = 6.9 Hz, 2H), 7.30 (d, *J* = 8.5 Hz, 1H), 7.16 (dd, *J* = 7.2, 5.5 Hz, 2H), 7.00 – 6.91 (m, 4H), 6.90 – 6.83 (m, 2H), 4.33 (t, *J* = 7.8 Hz, 1H), 3.46 (dd, *J* = 13.6, 7.4 Hz, 1H), 3.37 (dd, *J* = 13.6, 8.2 Hz, 1H). <sup>13</sup>C NMR (125 MHz, CDCl<sub>3</sub>) δ 161.4 (d, *J* = 251.6 Hz), 161.4 (d, *J* = 233.9 Hz), 141.4, 139.7 (d, *J* = 3.2 Hz), 135.6 (d, *J* = 3.1 Hz), 133.4, 132.2, 130.4 (d, *J* = 7.9 Hz), 129.5 (d, *J* = 7.8 Hz), 128.1, 127.7 (d, *J* = 19.2 Hz), 126.7, 126.0 (d, *J* = 18.4 Hz), 125.6, 115.3, 115.1, 115.0, 114.8, 52.5, 41.2. <sup>19</sup>F NMR (471 MHz, CDCl<sub>3</sub>) δ -116.7, -117.2. HRMS (EI) *m/z*: calcd for: C<sub>24</sub>H<sub>18</sub>F<sub>2</sub>: 344.1377; Found: 344.1385.



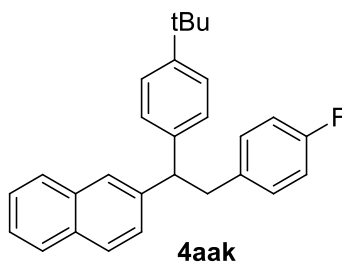

**2-(1-(4-(tert-butyl)phenyl)-2-(4-fluorophenyl)ethyl)naphthalene (4aak).** The optimized procedure was followed by using 30.8 mg of 2-vinylnaphthalene (**1a**) (0.20 mmol), 42.0 mg of 4-fluorophenyldiazonium tetrafluoroborate (**2a**) (0.20 mmol), 42.7 mg of (4-(tert-butyl)phenyl)boronic acid (**3k**) (0.24 mmol), 9.2 mg of Pd<sub>2</sub>(dba)<sub>3</sub> (0.01 mmol), 17.8 mg of lithium carbonate (0.24 mmol) and 1 mL of *t*-Amy-OH and stirred at rt. After 12 h, the reaction mixture was extracted water/EA. Then the organic layers were dried with Na<sub>2</sub>SO<sub>4</sub>, and concentrated to dryness. The crude product was purified by silica gel chromatography (silica gel, PE: EA = 100:1, v/v) to afford 66.5 mg of the product as a slight yellow solid (87%). <sup>1</sup>H NMR (500 MHz, CDCl<sub>3</sub>) δ 7.76 (dd, *J* = 19.9, 9.8 Hz, 3H), 7.63 (s, 1H), 7.47 – 7.40 (m, 2H), 7.34 (d, *J* = 8.5 Hz, 1H), 7.32 – 7.28 (m, 2H), 7.21 (d, *J* = 8.2 Hz, 2H), 6.99 – 6.94 (m, 2H), 6.84 (t, *J* = 8.7 Hz, 2H), 4.33 (t, *J* = 7.7 Hz, 1H), 3.44 (d, *J* = 7.8 Hz, 2H), 1.30 (s, 9H). <sup>13</sup>C NMR (125 MHz, CDCl<sub>3</sub>) δ 161.2 (d, *J* = 241.9 Hz), 149.1, 141.6, 141.1, 136.0 (d, *J* = 3.2 Hz), 133.4, 132.1, 130.4 (d, *J* = 7.8 Hz), 128.0, 127.7, 127.5, 126.8, 126.3, 125.9, 125.4, 125.3, 114.9, 114.7, 52.9, 41.1, 34.3, 31.3. <sup>19</sup>F NMR (471 MHz, CDCl<sub>3</sub>) δ -117.5. HRMS (EI) *m/z*: calcd for: C<sub>28</sub>H<sub>27</sub>F: 382.2097; Found: 382.2106.

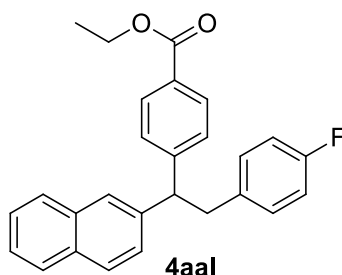

**ethyl 4-(2-(4-fluorophenyl)-1-(naphthalen-2-yl)ethyl)benzoate (4aal).** The optimized procedure was followed by using 30.8 mg of 2-vinylnaphthalene (**1a**) (0.20 mmol), 42.0 mg of 4-fluorophenyldiazonium tetrafluoroborate (**2a**) (0.20 mmol), 46.6 mg of (4-(ethoxycarbonyl)phenyl)boronic acid (**3l**) (0.24 mmol), 9.2 mg of Pd<sub>2</sub>(dba)<sub>3</sub> (0.01 mmol), 17.8 mg of lithium carbonate (0.24 mmol) and 1 mL of *t*-Amy-OH and stirred at rt. After 12 h, the reaction mixture was extracted water/EA. Then the organic layers were dried with Na<sub>2</sub>SO<sub>4</sub>, and concentrated to dryness. The crude product was purified by silica gel chromatography (silica gel, PE: EA = 100:1, v/v) to afford 43.1 mg of the product as a yellow solid (54%). <sup>1</sup>H NMR (500 MHz, CDCl<sub>3</sub>) δ 7.95 (d, *J* = 7.3 Hz, 2H), 7.79 (t, *J* = 7.2 Hz, 2H), 7.75 (d, *J* = 8.5 Hz, 1H), 7.68 (s, 1H), 7.50 – 7.43 (m, 2H), 7.29 (d, *J* = 7.3 Hz, 3H), 6.97 (dd, *J* = 8.2, 5.6 Hz, 2H), 6.86 (t, *J* = 8.4 Hz, 2H), 4.41 (t, *J* = 7.8 Hz, 1H), 4.36 (q, *J* = 6.8 Hz, 2H), 3.50 (dd, *J* = 13.7, 7.4 Hz, 1H), 3.42 (dd, *J* = 13.7, 8.3 Hz, 1H), 1.38 (t, *J* = 7.1 Hz, 3H). <sup>13</sup>C NMR (125 MHz, CDCl<sub>3</sub>) δ 166.4, 161.3 (d, *J* = 242.6 Hz), 149.1, 140.8, 135.3 (d, *J* = 3.2 Hz), 133.4, 132.2, 130.4 (d, *J* = 7.8 Hz), 129.7, 128.7, 128.2 (d, *J* = 4.9 Hz), 127.7, 127.6, 126.6, 126.1 (d, *J* = 2.8 Hz), 125.7, 115.0, 114.9, 60.8,



53.3, 40.8, 14.3.  $^{19}\text{F}$  NMR (471 MHz,  $\text{CDCl}_3$ )  $\delta$  -117.0. HRMS (EI)  $m/z$ : calcd for:  $\text{C}_{27}\text{H}_{23}\text{FO}_2$ : 398.1682; Found: 398.1680.

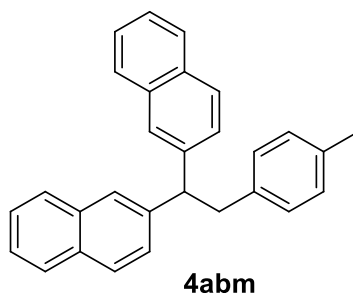

**2,2'-(2-(*p*-tolyl)ethane-1,1-diyl)dinaphthalene(4abm).** The optimized procedure was followed by using 30.8 mg of 2-vinylnaphthalene (**1a**) (0.20 mmol), 41.2 mg of 4-tolyldiazonium tetrafluoroborate (**2b**) (0.20 mmol), 41.3 mg of naphthalen-2-ylboronic acid (**3m**) (0.24 mmol), 9.2 mg of  $\text{Pd}_2(\text{dba})_3$  (0.01 mmol), 17.8 mg of lithium carbonate (0.24 mmol) and 1 mL of *t*-Amy-OH and stirred at rt. After 12 h, the reaction mixture was extracted water/EA. Then the organic layers were dried with  $\text{Na}_2\text{SO}_4$ , and concentrated to dryness. The crude product was purified by silica gel chromatography (silica gel, PE: EA = 100:0, v/v) to afford 38.9 mg of the product as a colourless solid (52%).  $^1\text{H}$  NMR (500 MHz,  $\text{CDCl}_3$ )  $\delta$  7.78 (dd,  $J$  = 7.6, 1.7 Hz, 4H), 7.74 – 7.71 (m, 4H), 7.47 – 7.40 (m, 4H), 7.38 (dd,  $J$  = 8.6, 1.6 Hz, 2H), 6.97 (s, 4H), 4.57 (t,  $J$  = 7.7 Hz, 1H), 3.55 (d,  $J$  = 7.7 Hz, 2H), 2.25 (s, 3H).  $^{13}\text{C}$  NMR (125 MHz,  $\text{CDCl}_3$ )  $\delta$  141.9, 137.0, 135.3, 133.4, 132.1, 128.9, 128.8, 128.0, 127.8, 127.5, 127.0, 126.2, 125.9, 125.4, 53.1, 41.3, 21.0. HRMS (EI)  $m/z$ : calcd for:  $\text{C}_{29}\text{H}_{24}$ : 372.1878; Found: 372.1951.

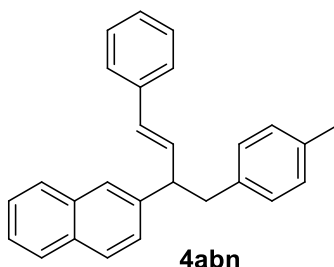

**(*E*)-2-(4-phenyl-1-(*p*-tolyl)but-3-en-2-yl)naphthalene(4abn).** The optimized procedure was followed by using 30.8 mg of 2-vinylnaphthalene (**1a**) (0.20 mmol), 41.2 mg of 4-tolyldiazonium tetrafluoroborate (**2b**) (0.20 mmol), 35.5 mg of (*E*)-styrylboronic acid (**3n**) (0.24 mmol), 9.2 mg of  $\text{Pd}_2(\text{dba})_3$  (0.01 mmol), 17.8 mg of lithium carbonate (0.24 mmol) and 1 mL of *t*-Amy-OH and stirred at rt. After 12 h, the reaction mixture was extracted water/EA. Then the organic layers were dried with  $\text{Na}_2\text{SO}_4$ , and concentrated to dryness. The crude product was purified by silica gel chromatography (silica gel, PE: EA = 100:0, v/v) to afford 32.1 mg of the product as a colourless solid (46%).  $^1\text{H}$  NMR (500 MHz,  $\text{CDCl}_3$ )  $\delta$  7.80 (dd,  $J$  = 16.3, 7.8 Hz, 3H), 7.66 (s, 1H), 7.48 – 7.43 (m, 2H), 7.41 (d,  $J$  = 8.4 Hz, 1H), 7.30 (dd,  $J$  = 16.3, 7.3 Hz, 4H), 7.19 (t,  $J$  = 7.1 Hz, 1H), 7.02 (s, 4H), 6.50 (dd,  $J$  = 15.9, 7.3 Hz, 1H), 6.33 (d,  $J$  = 15.9 Hz, 1H), 3.90 (q,  $J$  = 7.4 Hz, 1H), 3.20 (d,  $J$  = 7.4 Hz, 2H), 2.28 (s, 3H).  $^{13}\text{C}$  NMR (125 MHz,  $\text{CDCl}_3$ )  $\delta$  141.3, 137.5, 136.8, 135.4, 133.6, 133.4, 132.3, 130.2, 129.1, 128.9, 128.5, 128.0, 127.7, 127.6, 127.1, 126.6, 126.2, 126.2, 125.9, 125.4, 51.0, 42.1, 21.0. HRMS (EI)  $m/z$ : calcd for:  $\text{C}_{27}\text{H}_{24}$ : 348.1878; Found: 348.1951.



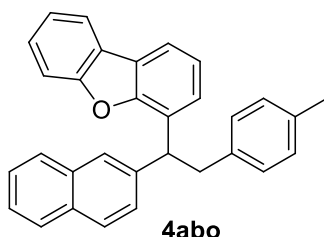

**4-(1-(naphthalen-2-yl)-2-(p-tolyl)ethyl)dibenzo[*b,d*]furan(4abo).** The optimized procedure was followed by using 30.8 mg of 2-vinylnaphthalene (**1a**) (0.20 mmol), 41.2 mg of 4-tolyldiazonium tetrafluoroborate (**2b**) (0.20 mmol), 50.9 mg of dibenzo[*b,d*]furan-4-ylboronic acid (**3o**) (0.24 mmol), 9.2 mg of Pd<sub>2</sub>(dba)<sub>3</sub> (0.01 mmol), 17.8 mg of lithium carbonate (0.24 mmol) and 1 mL of *t*-Amy-OH and stirred at rt. After 12 h, the reaction mixture was extracted water/EA. Then the organic layers were dried with Na<sub>2</sub>SO<sub>4</sub>, and concentrated to dryness. The crude product was purified by silica gel chromatography (silica gel, PE: EA = 100:1, v/v) to afford 37.9 mg of the product as a colourless solid (46%). <sup>1</sup>H NMR (500 MHz, CDCl<sub>3</sub>) δ 7.92 (d, *J* = 7.6 Hz, 1H), 7.85 (s, 1H), 7.81 – 7.73 (m, 4H), 7.60 – 7.54 (m, 2H), 7.42 (dq, *J* = 13.9, 6.8, 1.1 Hz, 4H), 7.31 (dt, *J* = 15.1, 7.5 Hz, 2H), 7.06 (d, *J* = 7.9 Hz, 2H), 6.96 (d, *J* = 7.9 Hz, 2H), 5.11 (t, *J* = 7.8 Hz, 1H), 3.69 (dd, *J* = 14.0, 7.5 Hz, 1H), 3.63 (dd, *J* = 14.0, 8.2 Hz, 1H), 2.23 (s, 3H). <sup>13</sup>C NMR (125 MHz, CDCl<sub>3</sub>) δ 156.0, 154.2, 140.8, 137.0, 135.3, 133.4, 132.2, 128.8, 128.8, 128.7, 127.8, 127.8, 127.5, 126.9, 126.9, 126.5, 125.9, 125.9, 125.4, 124.5, 124.1, 122.8, 122.5, 120.6, 118.6, 111.7, 47.3, 40.4, 21.0. HRMS (EI) *m/z*: calcd for: C<sub>31</sub>H<sub>24</sub>O: 412.1827; Found: 412.1900.

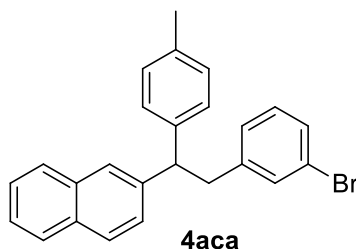

**2-(2-(3-bromophenyl)-1-(p-tolyl)ethyl)naphthalene (4aca).** The optimized procedure was followed by using 30.8 mg of 2-vinylnaphthalene (**1a**) (0.20 mmol), 59.8 mg of 3-bromophenyldiazonium tetrafluoroborate (**2c**) (0.20 mmol), 32.6 mg of p-tolylboronic acid (**3a**) (0.24 mmol), 9.2 mg of Pd<sub>2</sub>(dba)<sub>3</sub> (0.01 mmol), 17.8 mg of lithium carbonate (0.24 mmol) and 1 mL of *t*-Amy-OH and stirred at rt. After 12 h, the reaction mixture was extracted water/EA. Then the organic layers were dried with Na<sub>2</sub>SO<sub>4</sub>, and concentrated to dryness. The crude product was purified by silica gel chromatography (silica gel, PE: EA = 100:1, v/v) to afford 58.6 mg of the product as a brown oil (73%). <sup>1</sup>H NMR (500 MHz, CDCl<sub>3</sub>) δ 7.80 – 7.76 (m, 2H), 7.74 (d, *J* = 8.5 Hz, 1H), 7.66 (s, 1H), 7.47 – 7.41 (m, 2H), 7.32 (dd, *J* = 8.5, 1.8 Hz, 1H), 7.26 (d, *J* = 7.0 Hz, 2H), 7.13 (d, *J* = 8.1 Hz, 2H), 7.08 (d, *J* = 8.0 Hz, 2H), 7.00 (t, *J* = 8.0 Hz, 1H), 6.91 (d, *J* = 7.6 Hz, 1H), 4.35 (t, *J* = 7.8 Hz, 1H), 3.42 (qd, *J* = 13.7, 7.9 Hz, 2H), 2.30 (s, 3H). <sup>13</sup>C NMR (125 MHz, CDCl<sub>3</sub>) δ 142.6, 141.6, 140.8, 135.9, 133.4, 132.1, 132.0, 129.6, 129.1, 129.0, 128.0, 127.9, 127.7, 127.7, 127.5, 126.7, 125.9, 125.9, 125.4, 122.10, 52.4, 41.5, 21.0. HRMS (EI) *m/z*: calcd for: C<sub>25</sub>H<sub>21</sub>Br: 400.0827; Found: 400.0824.



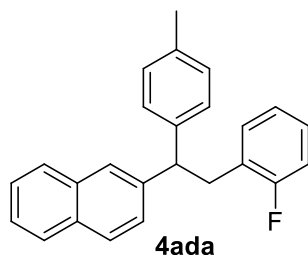

**2-(2-(2-fluorophenyl)-1-(p-tolyl)ethyl)naphthalene (4ada).** The optimized procedure was followed by using 30.8 mg of 2-vinylnaphthalene (**1a**) (0.20 mmol), 42.0 mg of 2-fluorophenyldiazonium tetrafluoroborate (**2d**) (0.20 mmol), 32.6 mg of p-tolylboronic acid (**3a**) (0.24 mmol), 9.2 mg of Pd<sub>2</sub>(dba)<sub>3</sub> (0.01 mmol), 17.8 mg of lithium carbonate (0.24 mmol) and 1 mL of *t*-Amy-OH and stirred at rt. After 12 h, the reaction mixture was extracted water/EA. Then the organic layers were dried with Na<sub>2</sub>SO<sub>4</sub>, and concentrated to dryness. The crude product was purified by silica gel chromatography (silica gel, PE: EA = 100:1, v/v) to afford 38.2 mg of the product as a yellow oil (57 %). <sup>1</sup>H NMR (500 MHz, CDCl<sub>3</sub>) δ 7.80 – 7.75 (m, 2H), 7.74 (d, *J* = 8.5 Hz, 1H), 7.69 (s, 1H), 7.47 – 7.40 (m, 2H), 7.36 (dd, *J* = 8.5, 1.8 Hz, 1H), 7.17 (d, *J* = 8.1 Hz, 2H), 7.13 – 7.06 (m, 3H), 6.96 (td, *J* = 9.3, 2.5 Hz, 2H), 6.88 (td, *J* = 7.5, 1.1 Hz, 1H), 4.47 (t, *J* = 7.9 Hz, 1H), 3.55 – 3.43 (m, 2H), 2.31 (s, 3H). <sup>13</sup>C NMR (125 MHz, CDCl<sub>3</sub>) δ 161.2 (d, *J* = 243.1 Hz), 141.8, 141.0, 135.8, 133.4, 132.1, 131.2 (d, *J* = 4.9 Hz), 129.0, 127.9 (d, *J* = 2.1 Hz), 127.6 (d, *J* = 28.8 Hz), 127.6 (d, *J* = 8.1 Hz), 127.0 (d, *J* = 15.3 Hz), 126.8, 126.0, 125.8, 125.3, 123.6 (d, *J* = 3.5 Hz), 115.1, 114.9, 51.1, 35.0, 21.0. <sup>19</sup>F NMR (471 MHz, CDCl<sub>3</sub>) δ -118.1. HRMS (EI) *m/z*: calcd for: C<sub>25</sub>H<sub>21</sub>F: 340.1627; Found: 340.1634.

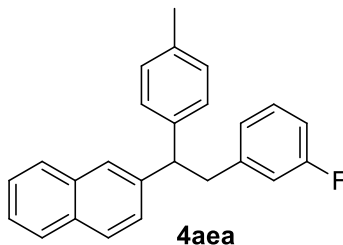

**2-(2-(3-fluorophenyl)-1-(p-tolyl)ethyl)naphthalene (4aea).** The optimized procedure was followed by using 30.8 mg of 2-vinylnaphthalene (**1a**) (0.20 mmol), 42.0 mg of 3-fluorophenyldiazonium tetrafluoroborate (**2e**) (0.20 mmol), 32.6 mg of p-tolylboronic acid (**3a**) (0.24 mmol), 9.2 mg of Pd<sub>2</sub>(dba)<sub>3</sub> (0.01 mmol), 17.8 mg of lithium carbonate (0.24 mmol) and 1 mL of *t*-Amy-OH and stirred at rt. After 12 h, the reaction mixture was extracted water/EA. Then the organic layers were dried with Na<sub>2</sub>SO<sub>4</sub>, and concentrated to dryness. The crude product was purified by silica gel chromatography (silica gel, PE: EA = 100:1, v/v) to afford 45.1 mg of the product as a yellow oil (67%). <sup>1</sup>H NMR (500 MHz, CDCl<sub>3</sub>) δ 7.78 (t, *J* = 7.1 Hz, 2H), 7.74 (d, *J* = 8.5 Hz, 1H), 7.67 (s, 1H), 7.48 – 7.41 (m, 2H), 7.34 (dd, *J* = 8.5, 1.8 Hz, 1H), 7.18 – 7.11 (m, 3H), 7.09 (d, *J* = 8.0 Hz, 2H), 7.00 – 6.82 (m, 2H), 6.81 – 6.77 (m, 1H), 4.38 (t, *J* = 7.8 Hz, 1H), 3.47 (qd, *J* = 13.7, 7.8 Hz, 2H), 2.31 (s, 3H). <sup>13</sup>C NMR (125 MHz, CDCl<sub>3</sub>) δ 162.6 (d, *J* = 243.5 Hz), 142.9 (d, *J* = 7.3 Hz), 141.7, 140.9, 135.9, 133.4, 132.1, 129.4 (d, *J* = 8.4 Hz), 129.1, 128.0, 127.9, 127.7, 127.5, 126.7, 125.9 (d, *J* = 2.9 Hz), 125.4, 124.7 (d, *J* = 2.7 Hz), 115.9, 115.7, 112.9, 112.7, 52.4, 41.6, 21.0. <sup>19</sup>F NMR (471 MHz, CDCl<sub>3</sub>) δ -113.9. HRMS (EI) *m/z*: calcd for: C<sub>25</sub>H<sub>21</sub>F: 340.1627; Found: 340.1626.



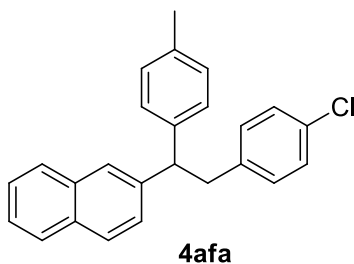

**2-(2-(4-chlorophenyl)-1-(*p*-tolyl)ethyl)naphthalene (4afa).** The optimized procedure was followed by using 30.8 mg of 2-vinylnaphthalene (**1a**) (0.20 mmol), 45.4 mg of 4-chlorophenyldiazonium tetrafluoroborate (**2f**) (0.20 mmol), 32.6 mg of *p*-tolylboronic acid (**3a**) (0.24 mmol), 9.2 mg of Pd<sub>2</sub>(dba)<sub>3</sub> (0.01 mmol), 17.8 mg of lithium carbonate (0.24 mmol) and 1 mL of *t*-Amy-OH and stirred at rt. After 12 h, the reaction mixture was extracted water/EA. Then the organic layers were dried with Na<sub>2</sub>SO<sub>4</sub>, and concentrated to dryness. The crude product was purified by silica gel chromatography (silica gel, PE: EA = 100:1, v/v) to afford 56.2 mg of the product as a slight yellow oil (79%). <sup>1</sup>H NMR (500 MHz, CDCl<sub>3</sub>) δ 7.79 (t, *J* = 7.6 Hz, 2H), 7.75 (d, *J* = 8.5 Hz, 1H), 7.66 (s, 1H), 7.48 – 7.42 (m, 2H), 7.33 (dd, *J* = 8.5, 1.8 Hz, 1H), 7.15 (d, *J* = 8.3 Hz, 4H), 7.09 (d, *J* = 8.0 Hz, 2H), 6.97 (d, *J* = 8.4 Hz, 2H), 4.34 (t, *J* = 7.8 Hz, 1H), 3.48 – 3.39 (m, 2H), 2.32 (s, 3H). <sup>13</sup>C NMR (125 MHz, CDCl<sub>3</sub>) δ 141.7, 140.9, 138.8, 135.9, 133.4, 132.1, 131.6, 130.4, 129.1, 128.2, 128.0, 127.9, 127.7, 127.53, 126.7, 126.0, 126.0, 125.4, 52.6, 41.3, 21.0. HRMS (EI) *m/z*: calcd for: C<sub>25</sub>H<sub>21</sub>Cl: 356.1332; Found: 356.1343.

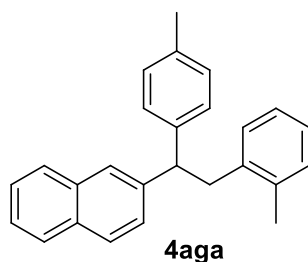

**2-(2-(*o*-tolyl)-1-(*p*-tolyl)ethyl)naphthalene (4aga).** The optimized procedure was followed by using 30.8 mg of 2-vinylnaphthalene (**1a**) (0.20 mmol), 41.2 mg of *o*-tolyl diazonium tetrafluoroborate (**2g**) (0.20 mmol), 32.6 mg of *p*-tolylboronic acid (**3a**) (0.24 mmol), 9.2 mg of Pd<sub>2</sub>(dba)<sub>3</sub> (0.01 mmol), 17.8 mg of lithium carbonate (0.24 mmol) and 1 mL of *t*-Amy-OH and stirred at rt. After 12 h, the reaction mixture was extracted water/EA. Then the organic layers were dried with Na<sub>2</sub>SO<sub>4</sub>, and concentrated to dryness. The crude product was purified by silica gel chromatography (silica gel, PE: EA = 100:1, v/v) to afford 50.6 mg of the product as a slight yellow oil (76%). <sup>1</sup>H NMR (500 MHz, CDCl<sub>3</sub>) δ 7.80 – 7.76 (m, 2H), 7.74 (d, *J* = 8.5 Hz, 1H), 7.66 (s, 1H), 7.47 – 7.41 (m, 2H), 7.33 (dd, *J* = 8.5, 1.7 Hz, 1H), 7.13 (t, *J* = 7.3 Hz, 2H), 7.07 (ddd, *J* = 9.5, 8.6, 3.1 Hz, 4H), 6.97 (t, *J* = 6.6 Hz, 1H), 6.89 (d, *J* = 7.3 Hz, 1H), 4.39 (t, *J* = 7.5 Hz, 1H), 3.51 – 3.41 (m, 2H), 2.32 (s, 3H), 2.22 (s, 3H). <sup>13</sup>C NMR (125 MHz, CDCl<sub>3</sub>) δ 142.2, 141.4, 138.4, 136.3, 135.7, 133.4, 132.1, 123.0, 129.7, 129.0, 128.0, 127.9, 127.7, 127.5, 127.0, 126.0, 125.9, 125.8, 125.5, 125.3, 51.3, 39.1, 21.0, 19.5. HRMS (EI) *m/z*: calcd for: C<sub>26</sub>H<sub>24</sub>: 336.1878; Found: 336.1867.



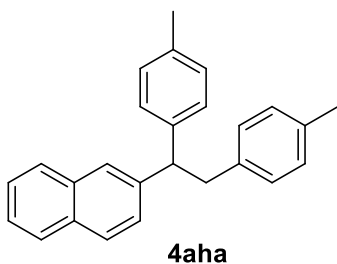

**2-(2-(4-ethylphenyl)-1-(*p*-tolyl)ethyl)naphthalene (4aha).** The optimized procedure was followed by using 30.8 mg of 2-vinylnaphthalene (**1a**) (0.20 mmol), 44.0 mg of 4-ethylphenyldiazonium tetrafluoroborate (**2h**) (0.20 mmol), 32.6 mg of *p*-tolylboronic acid (**3a**) (0.24 mmol), 9.2 mg of Pd<sub>2</sub>(dba)<sub>3</sub> (0.01 mmol), 17.8 mg of lithium carbonate (0.24 mmol) and 1 mL of *t*-Amy-OH and stirred at rt. After 12 h, the reaction mixture was extracted water/EA. Then the organic layers were dried with Na<sub>2</sub>SO<sub>4</sub>, and concentrated to dryness. The crude product was purified by silica gel chromatography (silica gel, PE: EA = 100:1, v/v) to afford 47.6 mg of the product as a yellow oil (68%). <sup>1</sup>H NMR (500 MHz, CDCl<sub>3</sub>) δ 7.78 (t, *J* = 6.9 Hz, 2H), 7.74 (d, *J* = 8.5 Hz, 1H), 7.68 (s, 1H), 7.47 – 7.41 (m, 2H), 7.36 (dd, *J* = 8.5, 1.7 Hz, 1H), 7.18 (d, *J* = 8.1 Hz, 2H), 7.09 (d, *J* = 7.9 Hz, 2H), 7.01 (q, *J* = 8.3 Hz, 4H), 4.40 (t, *J* = 7.7 Hz, 1H), 3.50 – 3.41 (m, 2H), 2.58 (q, *J* = 7.6 Hz, 2H), 2.31 (s, 3H), 1.20 (t, *J* = 7.6 Hz, 3H). <sup>13</sup>C NMR (125 MHz, CDCl<sub>3</sub>) δ 142.2, 141.6, 141.5, 137.4, 135.6, 133.4, 132.1, 129.0, 128.9, 128.0, 127.9, 127.7, 127.5, 127.5, 126.9, 126.0, 125.8, 125.3, 52.6, 41.5, 28.4, 21.0, 15.5. HRMS (EI) *m/z*: calcd for: C<sub>27</sub>H<sub>26</sub>: 350.2035; Found: 350.2030.

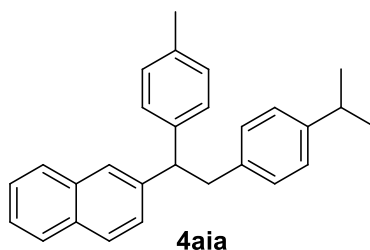

**2-(2-(4-isopropylphenyl)-1-(*p*-tolyl)ethyl)naphthalene (4aia).** The optimized procedure was followed by using 30.8 mg of 2-vinylnaphthalene (**1a**) (0.20 mmol), 50.4 mg of 4-isopropylphenyldiazonium tetrafluoroborate (**2i**) (0.20 mmol), 32.6 mg of *p*-tolylboronic acid (**3a**) (0.24 mmol), 9.2 mg of Pd<sub>2</sub>(dba)<sub>3</sub> (0.01 mmol), 17.8 mg of lithium carbonate (0.24 mmol) and 1 mL of *t*-Amy-OH and stirred at rt. After 12 h, the reaction mixture was extracted water/EA. Then the organic layers were dried with Na<sub>2</sub>SO<sub>4</sub>, and concentrated to dryness. The crude product was purified by silica gel chromatography (silica gel, PE: EA = 100:1, v/v) to afford 43.1 mg of the product as a slight yellow oil (59%). <sup>1</sup>H NMR (500 MHz, CDCl<sub>3</sub>) δ 7.77 (t, *J* = 7.7 Hz, 2H), 7.73 (d, *J* = 8.5 Hz, 1H), 7.67 (s, 1H), 7.43 (dq, *J* = 6.9, 5.5 Hz, 2H), 7.36 (dd, *J* = 8.5, 1.5 Hz, 1H), 7.18 (d, *J* = 8.0 Hz, 2H), 7.09 (d, *J* = 7.9 Hz, 2H), 7.04 (d, *J* = 8.0 Hz, 2H), 7.00 (d, *J* = 8.0 Hz, 2H), 4.40 (t, *J* = 7.7 Hz, 1H), 3.50 – 3.40 (m, 2H), 2.93 – 2.76 (m, 1H), 2.31 (s, 3H), 1.21 (d, *J* = 6.9 Hz, 6H). <sup>13</sup>C NMR (125 MHz, CDCl<sub>3</sub>) δ 146.3, 142.3, 141.6, 137.6, 135.6, 133.4, 132.1, 129.0, 128.9, 128.0, 127.9, 127.7, 127.5, 126.9, 126.1, 126.0, 125.8, 125.3, 52.6, 41.4, 33.6, 24.0, 24.0, 21.0. HRMS (EI) *m/z*: calcd for: C<sub>28</sub>H<sub>28</sub>: 364.2191; Found: 364.2199.



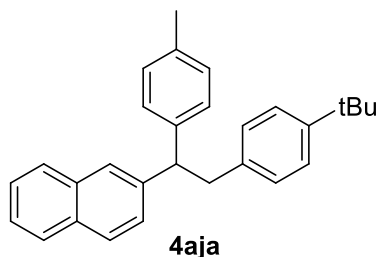

**2-(2-(4-(*tert*-butyl)phenyl)-1-(*p*-tolyl)ethyl)naphthalene (4aja).** The optimized procedure was followed by using 30.8 mg of 2-vinylnaphthalene (**1a**) (0.20 mmol), 49.6 mg of 4-(*tert*-butyl)phenyldiazonium tetrafluoroborate (**2j**) (0.20 mmol), 32.6 mg of *p*-tolylboronic acid (**3a**) (0.24 mmol), 9.2 mg of Pd<sub>2</sub>(dba)<sub>3</sub> (0.01 mmol), 17.8 mg of lithium carbonate (0.24 mmol) and 1 mL of *t*-Amy-OH and stirred at rt. After 12 h, the reaction mixture was extracted water/EA. Then the organic layers were dried with Na<sub>2</sub>SO<sub>4</sub>, and concentrated to dryness. The crude product was purified by silica gel chromatography (silica gel, PE: EA = 100:1, v/v) to afford 57.5 mg of the product as a yellow oil (76%). <sup>1</sup>H NMR (500 MHz, CDCl<sub>3</sub>) δ 7.78 (dd, *J* = 8.9, 7.4 Hz, 2H), 7.74 (d, *J* = 8.5 Hz, 1H), 7.68 (s, 1H), 7.47 – 7.41 (m, 2H), 7.37 (dd, *J* = 8.5, 1.5 Hz, 1H), 7.23 – 7.17 (m, 4H), 7.10 (d, *J* = 8.0 Hz, 2H), 7.02 (d, *J* = 8.1 Hz, 2H), 4.42 (t, *J* = 7.7 Hz, 1H), 3.51 – 3.42 (m, 2H), 2.32 (s, 3H), 1.29 (s, 9H). <sup>13</sup>C NMR (125 MHz, CDCl<sub>3</sub>) δ 148.6, 142.3, 141.6, 137.2, 135.6, 133.5, 132.1, 129.1, 128.6, 128.0, 127.9, 127.7, 127.5, 126.9, 126.1, 125.8, 125.3, 125.0, 52.5, 41.3, 34.3, 31.4, 21.0. HRMS (EI) *m/z*: calcd for: C<sub>29</sub>H<sub>30</sub>: 378.2348; Found: 378.2346.

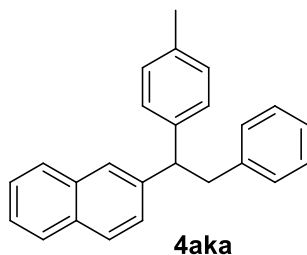

**2-(2-phenyl-1-(*p*-tolyl)ethyl)naphthalene (4aka).** The optimized procedure was followed by using 30.8 mg of 2-vinylnaphthalene (**1a**) (0.20 mmol), 38.4 mg of phenyldiazonium tetrafluoroborate (**2k**) (0.20 mmol), 32.6 mg of *p*-tolylboronic acid (**3a**) (0.24 mmol), 9.2 mg of Pd<sub>2</sub>(dba)<sub>3</sub> (0.01 mmol), 17.8 mg of lithium carbonate (0.24 mmol) and 1 mL of *t*-Amy-OH and stirred at rt. After 12 h, the reaction mixture was extracted water/EA. Then the organic layers were dried with Na<sub>2</sub>SO<sub>4</sub>, and concentrated to dryness. The crude product was purified by silica gel chromatography (silica gel, PE: EA = 100:1, v/v) to afford 49.0 mg of the product as a slight yellow oil (76%). <sup>1</sup>H NMR (500 MHz, CDCl<sub>3</sub>) δ 7.79 (dd, *J* = 8.0, 7.0 Hz, 2H), 7.74 (d, *J* = 8.5 Hz, 1H), 7.68 (s, 1H), 7.48 – 7.41 (m, 2H), 7.36 (dd, *J* = 8.5, 1.8 Hz, 1H), 7.22 – 7.16 (m, 4H), 7.16 – 7.12 (m, 1H), 7.09 (t, *J* = 8.2 Hz, 4H), 4.41 (t, *J* = 7.8 Hz, 1H), 3.54 – 3.44 (m, 2H), 2.32 (s, 3H). <sup>13</sup>C NMR (125 MHz, CDCl<sub>3</sub>) δ 142.1, 141.3, 140.3, 135.6, 133.4, 132.0, 129.0, 129.0, 128.0, 128.0, 127.9, 127.7, 127.5, 126.9, 126.0, 125.8, 125.8, 125.3, 52.6, 41.9, 21.0. HRMS (EI) *m/z*: calcd for: C<sub>25</sub>H<sub>22</sub>: 322.1722; Found: 322.1727.



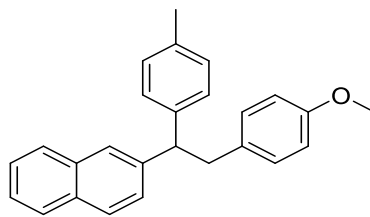

4ala

**2-(2-(4-methoxyphenyl)-1-(p-tolyl)ethyl)naphthalene (4ala).** The optimized procedure was followed by using 30.8 mg of 2-vinylnaphthalene (**1a**) (0.20 mmol), 44.4 mg of 4-methoxyphenyldiazonium tetrafluoroborate (**2l**) (0.20 mmol), 32.6 mg of *p*-tolylboronic acid (**3a**) (0.24 mmol), 9.2 mg of Pd<sub>2</sub>(dba)<sub>3</sub> (0.01 mmol), 17.8 mg of lithium carbonate (0.24 mmol) and 1 mL of *t*-Amy-OH and stirred at rt. After 12 h, the reaction mixture was extracted water/EA. Then the organic layers were dried with Na<sub>2</sub>SO<sub>4</sub>, and concentrated to dryness. The crude product was purified by silica gel chromatography (silica gel, PE: EA = 50:1, v/v) to afford 48.2 mg of the product as a slight yellow solid (69%). <sup>1</sup>H NMR (500 MHz, CDCl<sub>3</sub>) δ 7.83 – 7.79 (m, 2H), 7.77 (d, *J* = 8.5 Hz, 1H), 7.70 (s, 1H), 7.50 – 7.43 (m, 2H), 7.38 (dd, *J* = 8.5, 1.4 Hz, 1H), 7.20 (d, *J* = 8.0 Hz, 2H), 7.12 (d, *J* = 8.1 Hz, 2H), 7.00 (d, *J* = 8.5 Hz, 2H), 6.76 (d, *J* = 8.6 Hz, 2H), 4.38 (t, *J* = 7.7 Hz, 1H), 3.77 (s, 3H), 3.50 – 3.39 (m, 2H), 2.34 (s, 3H). <sup>13</sup>C NMR (125 MHz, CDCl<sub>3</sub>) δ 157.7, 142.2, 141.4, 135.6, 133.5, 132.4, 132.1, 129.9, 129.0, 128.0, 127.9, 127.8, 127.5, 126.9, 126.1, 125.8, 125.3, 113.5, 55.1, 53.0, 41.1, 21.0. HRMS (EI) *m/z*: calcd for: C<sub>26</sub>H<sub>24</sub>O: 352.1827; Found: 352.1833.

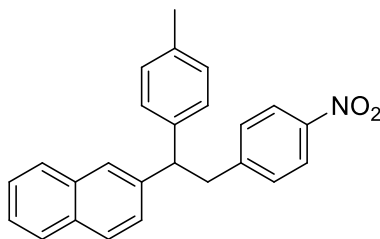

4ama

**2-(2-(4-nitrophenyl)-1-(p-tolyl)ethyl)naphthalene (4ama).** The optimized procedure was followed by using 30.8 mg of 2-vinylnaphthalene (**1a**) (0.20 mmol), 47.4 mg of 4-nitrophenyldiazonium tetrafluoroborate (**2m**) (0.20 mmol), 32.6 mg of *p*-tolylboronic acid (**3a**) (0.24 mmol), 9.2 mg of Pd<sub>2</sub>(dba)<sub>3</sub> (0.01 mmol), 17.8 mg of lithium carbonate (0.24 mmol) and 1 mL of *t*-Amy-OH and stirred at rt. After 12 h, the reaction mixture was extracted water/EA. Then the organic layers were dried with Na<sub>2</sub>SO<sub>4</sub>, and concentrated to dryness. The crude product was purified by silica gel chromatography (silica gel, PE: EA = 40:1, v/v) to afford 44.5 mg of the product as a yellow oil (61%). <sup>1</sup>H NMR (500 MHz, CDCl<sub>3</sub>) δ 8.04 – 8.02 (m, 1H), 8.02 – 8.00 (m, 1H), 7.80 – 7.74 (m, 3H), 7.65 (s, 1H), 7.49 – 7.42 (m, 2H), 7.32 (dd, *J* = 8.5, 1.8 Hz, 1H), 7.17 (d, *J* = 8.7 Hz, 2H), 7.13 (d, *J* = 8.2 Hz, 2H), 7.09 (d, *J* = 8.0 Hz, 2H), 4.38 (t, *J* = 7.9 Hz, 1H), 3.61 – 3.51 (m, 2H), 2.31 (s, 3H). <sup>13</sup>C NMR (125 MHz, CDCl<sub>3</sub>) δ 148.2, 146.3, 141.1, 140.2, 136.2, 133.3, 132.2, 129.8, 129.2, 128.2, 127.8, 127.7, 127.5, 126.4, 126.1, 125.9, 125.6, 123.3, 52.3, 41.7, 21.0. HRMS (EI) *m/z*: calcd for: C<sub>29</sub>H<sub>21</sub>NO<sub>2</sub>: 367.1572; Found: 367.1575.



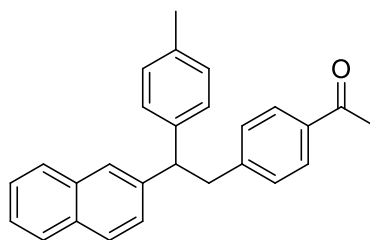

**4ana**

**1-(4-(2-(naphthalen-2-yl)-2-(p-tolyl)ethyl)phenyl)ethan-1-one (4ana).** The optimized procedure was followed by using 30.8 mg of 2-vinylnaphthalene (**1a**) (0.20 mmol), 50.2 mg of 4-acetylphenyldiazonium tetrafluoroborate (**2n**) (0.20 mmol), 32.6 mg of p-tolylboronic acid (**3a**) (0.24 mmol), 9.2 mg of Pd<sub>2</sub>(dba)<sub>3</sub> (0.01 mmol), 17.8 mg of lithium carbonate (0.24 mmol) and 1 mL of *t*-Amy-OH and stirred at 50 °C. After 12 h, the reaction mixture was extracted with water/EA. Then the organic layers were dried with Na<sub>2</sub>SO<sub>4</sub>, and concentrated to dryness. The crude product was purified by silica gel chromatography (silica gel, PE: EA = 40:1, v/v) to afford 30.5 mg of the product as a brown oil (42%). <sup>1</sup>H NMR (500 MHz, CDCl<sub>3</sub>) δ 7.76 (ddd, *J* = 9.3, 6.0, 4.0 Hz, 4H), 7.73 (d, *J* = 8.6 Hz, 1H), 7.65 (s, 1H), 7.43 (ddd, *J* = 5.4, 4.6, 1.5 Hz, 2H), 7.32 (dd, *J* = 8.5, 1.6 Hz, 1H), 7.13 (d, *J* = 8.3 Hz, 4H), 7.07 (d, *J* = 8.1 Hz, 2H), 4.39 (t, *J* = 7.8 Hz, 1H), 3.56 – 3.47 (m, 2H), 2.53 (s, 3H), 2.30 (s, 3H). <sup>13</sup>C NMR (125 MHz, CDCl<sub>3</sub>) δ 197.9, 146.1, 141.6, 140.8, 136.0, 135.1, 133.4, 132.2, 129.2, 129.2, 128.9, 128.4, 128.3, 128.1, 127.9, 127.7, 127.53, 126.7, 126.0, 125.45, 52.3, 41.9, 26.5, 21.0. HRMS (EI) *m/z*: calcd for: C<sub>27</sub>H<sub>24</sub>O: 364.1827; Found: 364.1831.

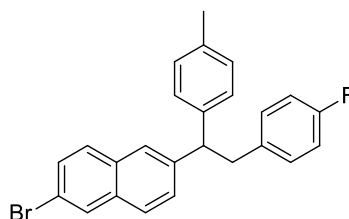

**4baa**

**2-bromo-6-(2-(4-fluorophenyl)-1-(p-tolyl)ethyl)naphthalene (4baa).** The optimized procedure was followed by using 46.4 mg of 2-bromo-6-vinylnaphthalene (**1b**) (0.20 mmol), 42.0 mg of 4-fluorophenyldiazonium tetrafluoroborate (**2a**) (0.20 mmol), 32.6 mg of p-tolylboronic acid (**3a**) (0.24 mmol), 9.2 mg of Pd<sub>2</sub>(dba)<sub>3</sub> (0.01 mmol), 17.8 mg of lithium carbonate (0.24 mmol) and 1 mL of *t*-Amy-OH and stirred at rt. After 12 h, the reaction mixture was extracted with water/EA. Then the organic layers were dried with Na<sub>2</sub>SO<sub>4</sub>, and concentrated to dryness. The crude product was purified by silica gel chromatography (silica gel, PE: EA = 100:1, v/v) to afford 55.6 mg of the product as a slight yellow solid (67%). <sup>1</sup>H NMR (500 MHz, CDCl<sub>3</sub>) δ 7.94 (d, *J* = 1.7 Hz, 1H), 7.63 (dd, *J* = 8.5, 5.9 Hz, 2H), 7.59 (s, 1H), 7.51 (dd, *J* = 8.8, 1.9 Hz, 1H), 7.34 (dd, *J* = 8.6, 1.7 Hz, 1H), 7.13 (d, *J* = 8.1 Hz, 2H), 7.09 (d, *J* = 8.2 Hz, 2H), 6.96 (dd, *J* = 8.5, 5.5 Hz, 2H), 6.85 (t, *J* = 8.7 Hz, 2H), 4.30 (t, *J* = 7.8 Hz, 1H), 3.41 (d, *J* = 7.8 Hz, 2H), 2.31 (s, 3H). <sup>13</sup>C NMR (125 MHz, CDCl<sub>3</sub>) δ 161.2 (d, *J* = 242.2 Hz), 142.4, 140.7, 136.0, 135.7 (d, *J* = 3.2 Hz), 133.2, 131.8, 130.4 (d, *J* = 7.8 Hz), 129.5, 129.3 (d, *J* = 13.2 Hz), 129.2, 127.9, 127.8, 127.1, 126.0, 119.3, 114.9, 114.8, 52.8, 41.0, 21.0. <sup>19</sup>F NMR (471 MHz, CDCl<sub>3</sub>) δ -117.2. HRMS (EI) *m/z*: calcd for: C<sub>25</sub>H<sub>20</sub>BrF: 418.0732; Found: 418.0727.



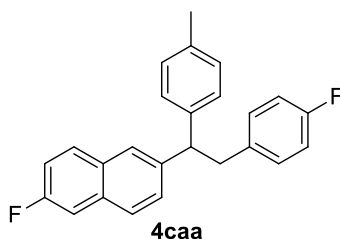

**2-fluoro-6-(2-(4-fluorophenyl)-1-(*p*-tolyl)ethyl)naphthalene (4caa).** The optimized procedure was followed by using 17.2 mg of 2-fluoro-6-vinylnaphthalene (**1c**) (0.10 mmol), 21.0 mg of 4-fluorophenyldiazonium tetrafluoroborate (**2a**) (0.10 mmol), 16.3 mg of *p*-tolylboronic acid (**3a**) (0.12 mmol), 4.6 mg of Pd<sub>2</sub>(dba)<sub>3</sub> (0.005 mmol), 8.9 mg of lithium carbonate (0.12 mmol) and 0.5 mL of *t*-Amy-OH and stirred at rt. After 12 h, the reaction mixture was extracted water/EA. Then the organic layers were dried with Na<sub>2</sub>SO<sub>4</sub>, and concentrated to dryness. The crude product was purified by silica gel chromatography (silica gel, PE: EA = 100:1, v/v) to afford 23.1 mg of the product as a slight yellow solid (65%). <sup>1</sup>H NMR (500 MHz, CDCl<sub>3</sub>) δ 7.73 (dd, *J* = 9.0, 5.6 Hz, 1H), 7.66 (d, *J* = 8.5 Hz, 1H), 7.61 (s, 1H), 7.38 (dd, *J* = 9.8, 2.5 Hz, 1H), 7.33 (d, *J* = 8.5 Hz, 1H), 7.22 (td, *J* = 8.7, 2.6 Hz, 1H), 7.12 (d, *J* = 8.1 Hz, 2H), 7.08 (d, *J* = 8.1 Hz, 2H), 6.96 (dd, *J* = 8.5, 5.5 Hz, 2H), 6.84 (t, *J* = 8.7 Hz, 2H), 4.29 (t, *J* = 7.8 Hz, 1H), 3.44 – 3.36 (m, 2H), 2.30 (s, 3H). <sup>13</sup>C NMR (125 MHz, CDCl<sub>3</sub>) δ 161.3 (d, *J* = 242.3 Hz), 160.4 (d, *J* = 243.8 Hz), 141.2, 140.9, 135.9, 135.8 (d, *J* = 3.2 Hz), 132.7 (d, *J* = 9.1 Hz), 130.4, 130.4 (d, *J* = 7.8 Hz), 130.3, 130.0 (d, *J* = 8.9 Hz), 129.1, 127.9, 127.8, 127.4 (d, *J* = 5.3 Hz), 126.0, 116.2 (d, *J* = 25.3 Hz), 114.9 (d, *J* = 21.1 Hz), 110.6 (d, *J* = 20.3 Hz), 52.7, 41.1, 21.0. <sup>19</sup>F NMR (471 MHz, CDCl<sub>3</sub>) δ -115.5, -117.3. HRMS (EI) *m/z*: calcd for: C<sub>25</sub>H<sub>20</sub>F<sub>2</sub>: 358.1533; Found: 358.1536.

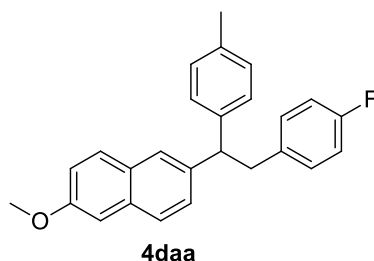

**2-(2-(4-fluorophenyl)-1-(*p*-tolyl)ethyl)-6-methoxynaphthalene (4daa).** The optimized procedure was followed by using 36.8 mg of 2-methoxy-6-vinylnaphthalene (**1d**) (0.20 mmol), 42.0 mg of 4-fluorophenyldiazonium tetrafluoroborate (**2a**) (0.20 mmol), 32.6 mg of *p*-tolylboronic acid (**3a**) (0.24 mmol), 9.2 mg of Pd<sub>2</sub>(dba)<sub>3</sub> (0.01 mmol), 17.8 mg of lithium carbonate (0.24 mmol) and 1 mL of *t*-Amy-OH and stirred at rt. After 12 h, the reaction mixture was extracted water/EA. Then the organic layers were dried with Na<sub>2</sub>SO<sub>4</sub>, and concentrated to dryness. The crude product was purified by silica gel chromatography (silica gel, PE: EA = 40:1, v/v) to afford 47.0 mg of the product as a field gray solid (63%). <sup>1</sup>H NMR (500 MHz, CDCl<sub>3</sub>) δ 7.65 (dd, *J* = 12.9, 8.7 Hz, 2H), 7.57 (s, 1H), 7.29 (dd, *J* = 8.4, 1.5 Hz, 1H), 7.15 – 7.12 (m, 3H), 7.08 (d, *J* = 8.2 Hz, 3H), 6.97 (dd, *J* = 8.3, 5.6 Hz, 2H), 6.85 (t, *J* = 8.7 Hz, 2H), 4.29 (t, *J* = 7.8 Hz, 1H), 3.91 (s, 3H), 3.46 – 3.36 (m, 2H), 2.31 (s, 3H). <sup>13</sup>C NMR (125 MHz, CDCl<sub>3</sub>) δ 161.2 (d, *J* = 242.8 Hz), 157.4, 141.3, 139.6, 136.0 (d, *J* = 3.1 Hz), 135.7, 133.1, 130.4 (d, *J* = 7.8 Hz), 129.1 (d, *J* = 16.5 Hz), 128.9, 127.9, 127.3, 126.9, 125.9, 118.7, 114.9, 114.7, 105.8, 55.3, 52.7, 41.2, 21.0. <sup>19</sup>F NMR (471 MHz, CDCl<sub>3</sub>) δ -117.5. HRMS (EI) *m/z*: calcd for: C<sub>26</sub>H<sub>23</sub>FO: 370.1733; Found: 370.1737.



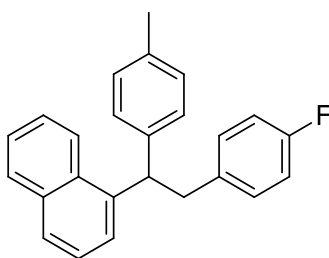

**4eaa**

**1-(2-(4-fluorophenyl)-1-(*p*-tolyl)ethyl)naphthalene (4eaa).** The optimized procedure was followed by using 30.8 mg of 1-vinylnaphthalene (**1e**) (0.20 mmol), 42.0 mg of 4-fluorophenyldiazonium tetrafluoroborate (**2a**) (0.20 mmol), 32.6 mg of *p*-tolylboronic acid (**3a**) (0.24 mmol), 9.2 mg of Pd<sub>2</sub>(dba)<sub>3</sub> (0.01 mmol), 17.8 mg of lithium carbonate (0.24 mmol) and 1 mL of *t*-Amy-OH and stirred at rt. After 12 h, the reaction mixture was extracted water/EA. Then the organic layers were dried with Na<sub>2</sub>SO<sub>4</sub>, and concentrated to dryness. The crude product was purified by silica gel chromatography (silica gel, PE: EA = 100:1, v/v) to afford 51.7 mg of the product as a yellow oil (76%). <sup>1</sup>H NMR (500 MHz, CDCl<sub>3</sub>) δ 8.05 (d, *J* = 9.0 Hz, 1H), 7.85 – 7.81 (m, 1H), 7.75 (d, *J* = 8.1 Hz, 1H), 7.58 (d, *J* = 7.1 Hz, 1H), 7.49 (t, *J* = 7.7 Hz, 1H), 7.42 (p, *J* = 6.9 Hz, 2H), 7.01 (ddd, *J* = 13.8, 12.7, 6.8 Hz, 6H), 6.86 (t, *J* = 8.4 Hz, 2H), 4.98 – 4.91 (m, 1H), 3.50 (dd, *J* = 13.8, 6.3 Hz, 1H), 3.41 (dd, *J* = 13.8, 9.0 Hz, 1H), 2.27 (s, 3H). <sup>13</sup>C NMR (125 MHz, CDCl<sub>3</sub>) δ 161.3 (d, *J* = 242.1 Hz), 140.8, 140.0, 136.0 (d, *J* = 3.1 Hz), 135.7, 134.0, 131.7, 130.4 (d, *J* = 7.8 Hz), 129.0, 128.8, 128.1, 127.1, 125.9, 125.3 (d, *J* = 4.0 Hz), 124.4, 123.6, 114.9, 114.7, 47.9, 41.8, 21.0. <sup>19</sup>F NMR (471 MHz, CDCl<sub>3</sub>) δ -117.4. HRMS (EI) *m/z*: calcd for: C<sub>25</sub>H<sub>21</sub>F: 340.1627; Found: 340.1621.

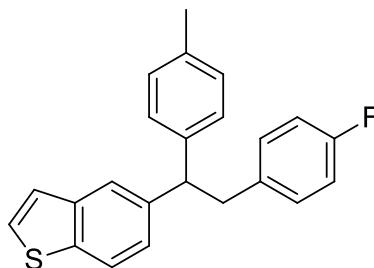

**4faa**

**5-(2-(4-fluorophenyl)-1-(*p*-tolyl)ethyl)benzo[*b*]thiophene (4faa).** The optimized procedure was followed by using 16.0 mg of 5-vinylbenzo[*b*]thiophene (**1f**) (0.10 mmol), 21.0 mg of 4-fluorophenyldiazonium tetrafluoroborate (**2a**) (0.10 mmol), 16.3 mg of *p*-tolylboronic acid (**3a**) (0.12 mmol), 4.6 mg of Pd<sub>2</sub>(dba)<sub>3</sub> (0.005 mmol), 8.9 mg of lithium carbonate (0.12 mmol) and 1 mL of *t*-Amy-OH and stirred at rt. After 12 h, the reaction mixture was extracted water/EA. Then the organic layers were dried with Na<sub>2</sub>SO<sub>4</sub>, and concentrated to dryness. The crude product was purified by silica gel chromatography (silica gel, PE: EA = 80:1, v/v) to afford 14.9 mg of the product as a slight yellow solid (44%). <sup>1</sup>H NMR (500 MHz, CDCl<sub>3</sub>) δ 7.74 (d, *J* = 8.4 Hz, 1H), 7.63 (d, *J* = 1.6 Hz, 1H), 7.40 (d, *J* = 5.4 Hz, 1H), 7.25 (d, *J* = 5.4 Hz, 1H), 7.17 (dd, *J* = 8.4, 1.7 Hz, 1H), 7.12 (d, *J* = 8.1 Hz, 2H), 7.07 (d, *J* = 8.0 Hz, 2H), 6.98 – 6.93 (m, 2H), 6.87 – 6.81 (m, 2H), 4.27 (t, *J* = 7.8 Hz, 1H), 3.38 (d, *J* = 7.8 Hz, 2H), 2.29 (s, 3H). <sup>13</sup>C NMR (125 MHz, CDCl<sub>3</sub>) δ 161.2 (d, *J* = 242.0 Hz), 141.4, 140.7, 139.8, 137.6, 136.0 (d, *J* = 3.2 Hz), 135.8, 130.4 (d, *J* = 7.8 Hz), 129.1, 127.8, 126.5, 124.9, 123.8, 122.4 (d, *J* = 24.2 Hz), 114.9, 114.7, 52.7, 41.4, 21.0.



$^{19}\text{F}$  NMR (471 MHz,  $\text{CDCl}_3$ )  $\delta$  -117.5. HRMS (EI)  $m/z$ : calcd for:  $\text{C}_{23}\text{H}_{19}\text{FS}$ : 346.1191; Found: 346.1189.

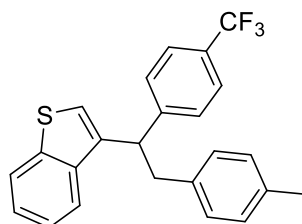

**4gbi**

**3-(2-(*p*-tolyl)-1-(4-(trifluoromethyl)phenyl)ethyl)benzo[*b*]thiophene (4gbi).** The optimized procedure was followed by using 32.0 mg of 3-vinylbenzo[*b*]thiophene (**1g**) (0.20 mmol), 41.2 mg of *p*-tolyl diazonium tetrafluoroborate (**2b**) (0.20 mmol), 4-(trifluoromethyl)phenylboronic acid (**3i**) (0.24 mmol), 9.2 mg of  $\text{Pd}_2(\text{dba})_3$  (0.01 mmol), 17.8 mg of lithium carbonate (0.024 mmol) and 1.0 mL of *t*-Amy-OH and stirred at rt. After 12 h, the reaction mixture was extracted water/EA. Then the organic layers were dried with  $\text{Na}_2\text{SO}_4$ , and concentrated to dryness. The crude product was purified by silica gel chromatography (silica gel, PE: EA = 200:1, v/v) to afford 43 mg of the product as a light yellow oil (55%).  $^1\text{H}$  NMR (500 MHz,  $\text{CDCl}_3$ )  $\delta$  7.85 (d,  $J$  = 7.9 Hz, 1H), 7.52 (d,  $J$  = 8.0 Hz, 1H), 7.46 (d,  $J$  = 8.1 Hz, 2H), 7.38 (s, 1H), 7.31 (dd,  $J$  = 11.1, 4.0 Hz, 1H), 7.29 – 7.26 (m, 1H), 7.23 (d,  $J$  = 8.1 Hz, 2H), 7.02 (d,  $J$  = 7.8 Hz, 2H), 6.91 (d,  $J$  = 7.9 Hz, 2H), 4.61 (dd,  $J$  = 9.3, 5.9 Hz, 1H), 3.57 (dd,  $J$  = 13.7, 5.9 Hz, 1H), 3.27 (dd,  $J$  = 13.6, 9.4 Hz, 1H), 2.30 (s, 3H).  $^{13}\text{C}$  NMR (125 MHz,  $\text{CDCl}_3$ )  $\delta$  147.0, 140.5, 138.3, 138.0, 136.0, 135.8, 129.0, 128.8, 128.7 (q,  $J$  = 75.8, 43.5 Hz), 128.4, 125.3 (q,  $J$  = 3.7 Hz), 124.4, 124.0, 122.9, 122.2, 122.0, 47.1, 41.8, 21.0.  $^{19}\text{F}$  NMR (471 MHz,  $\text{CDCl}_3$ )  $\delta$  -62.3. HRMS (EI)  $m/z$ : calcd for:  $\text{C}_{24}\text{H}_{19}\text{F}_3\text{S}$ : 396.1160; Found: 396.1161.

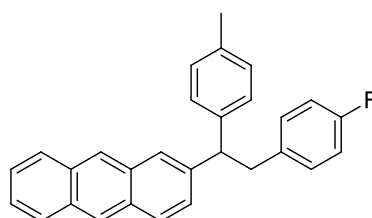

**4haa**

**2-(2-(4-fluorophenyl)-1-(*p*-tolyl)ethyl)anthracene (4haa).** The optimized procedure was followed by using 20.4 mg of 2-vinylanthracene (**1h**) (0.10 mmol), 21.0 mg of 4-fluorophenyldiazonium tetrafluoroborate (**2a**) (0.10 mmol), 16.3 mg of *p*-tolylboronic acid (**3a**) (0.12 mmol), 4.6 mg of  $\text{Pd}_2(\text{dba})_3$  (0.005 mmol), 8.9 mg of lithium carbonate (0.12 mmol) and 0.5 mL of *t*-Amy-OH and stirred at rt. After 12 h, the reaction mixture was extracted water/EA. Then the organic layers were dried with  $\text{Na}_2\text{SO}_4$ , and concentrated to dryness. The crude product was purified by silica gel chromatography (silica gel, PE: EA = 100:1, v/v) to afford 29 mg of the product as a brown solid (74%).  $^1\text{H}$  NMR (500 MHz,  $\text{CDCl}_3$ )  $\delta$  8.35 (s, 1H), 8.34 (s, 1H), 7.98 (dd,  $J$  = 9.2, 3.4 Hz, 2H), 7.89 (d,  $J$  = 8.8 Hz, 1H), 7.78 (s, 1H), 7.47 – 7.44 (m, 2H), 7.29 (dd,  $J$  = 8.8, 1.7 Hz, 1H), 7.16 (d,  $J$  = 8.1 Hz, 2H), 7.10 (s, 1H), 7.09 (s, 1H), 6.99 (d,  $J$  = 3.2 Hz, 1H), 6.98 (s, 1H), 6.85 (t,  $J$  = 8.8 Hz, 2H), 4.33 (t,  $J$  = 7.8 Hz, 1H), 3.49 (dd,  $J$  = 13.7, 7.8 Hz, 1H), 3.42 (dd,  $J$



= 13.7, 7.7 Hz, 1H), 2.31 (s, 3H).  $^{13}\text{C}$  NMR (125 MHz,  $\text{CDCl}_3$ )  $\delta$  161.2 (d,  $J$  = 242.1 Hz), 141.1, 140.7, 135.9 (d,  $J$  = 2.9 Hz), 131.8, 131.7, 131.5, 130.6, 130.4 (d,  $J$  = 7.8 Hz), 129.1, 129.0, 128.8 (d,  $J$  = 15.6 Hz), 128.3, 128.1, 128.1, 128.0, 126.8, 125.9, 125.6, 125.3, 125.1, 114.9, 114.8, 53.0, 40.8, 21.0.  $^{19}\text{F}$  NMR (471 MHz,  $\text{CDCl}_3$ )  $\delta$  -117.4. HRMS (EI)  $m/z$ : calcd for:  $\text{C}_{29}\text{H}_{23}\text{F}$ : 390.1784; Found:390.1787.

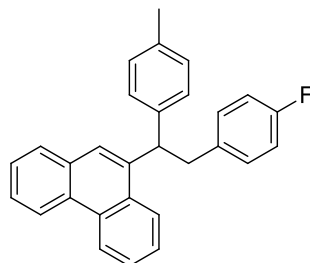

**4iaa**

**9-(2-(4-fluorophenyl)-1-(*p*-tolyl)ethyl)phenanthrene (4iaa).** The optimized procedure was followed by using 40.8 mg of 9-vinylphenanthrene (**1i**) (0.20 mmol), 42.0 mg of 4-fluorophenyldiazonium tetrafluoroborate (**2a**) (0.20 mmol), 32.6 mg of *p*-tolylboronic acid (**3a**) (0.24 mmol), 9.2 mg of  $\text{Pd}_2(\text{dba})_3$  (0.01 mmol), 17.8 mg of lithium carbonate (0.24 mmol) and 1 mL of *t*-Amy-OH and stirred at rt. After 12 h, the reaction mixture was extracted water/EA. Then the organic layers were dried with  $\text{Na}_2\text{SO}_4$ , and concentrated to dryness. The crude product was purified by silica gel chromatography (silica gel, PE: EA = 100:1, v/v) to afford 56.2 mg of the product as a slight yellow solid (72%).  $^1\text{H}$  NMR (500 MHz,  $\text{CDCl}_3$ )  $\delta$  8.73 (d,  $J$  = 8.1 Hz, 1H), 8.68 (d,  $J$  = 7.5 Hz, 1H), 8.12 (d,  $J$  = 8.1 Hz, 1H), 7.94 (dd,  $J$  = 7.6, 1.5 Hz, 1H), 7.88 (s, 1H), 7.67 – 7.58 (m, 3H), 7.54 – 7.50 (m, 1H), 7.07 (d,  $J$  = 8.1 Hz, 2H), 7.02 (td,  $J$  = 8.2, 5.5 Hz, 4H), 6.90 (t,  $J$  = 8.7 Hz, 2H), 4.94 (dd,  $J$  = 9.1, 5.9 Hz, 1H), 3.62 (dd,  $J$  = 13.7, 5.9 Hz, 1H), 3.45 (dd,  $J$  = 13.7, 9.2 Hz, 1H), 2.28 (s, 3H).  $^{13}\text{C}$  NMR (125 MHz,  $\text{CDCl}_3$ )  $\delta$  161.3 (d,  $J$  = 242.1 Hz), 140.4, 137.9, 136.0 (d,  $J$  = 3.2 Hz), 135.8, 131.5, 131.1, 130.9, 130.5 (d,  $J$  = 7.8 Hz), 129.7, 129.0, 128.5, 128.1, 126.6 (d,  $J$  = 9.8 Hz), 126.4, 126.1, 125.2, 124.5, 123.1, 122.4, 114.9, 114.8, 48.2, 41.9, 21.0.  $^{19}\text{F}$  NMR (471 MHz,  $\text{CDCl}_3$ )  $\delta$  -117.4. HRMS (EI)  $m/z$ : calcd for:  $\text{C}_{29}\text{H}_{23}\text{F}$ : 390.1784; Found:390.1786.

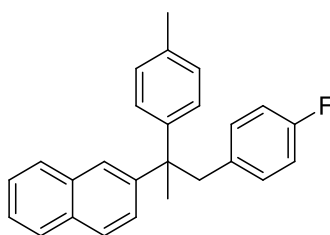

**4kaa**

**2-(1-(4-fluorophenyl)-2-(*p*-tolyl)propan-2-yl)naphthalene (4kaa).** The optimized procedure was followed by using 16.8 mg of 2-(prop-1-en-2-yl)naphthalene (**1k**) (0.10 mmol), 21.0 mg of 4-fluorophenyldiazonium tetrafluoroborate (**2a**) (0.10 mmol), 16.3 mg of *p*-tolylboronic acid (**3a**) (0.12 mmol), 4.6 mg of  $\text{Pd}_2(\text{dba})_3$  (0.005 mmol), 8.9 mg of lithium carbonate (0.12 mmol) and 0.5mL of *t*-Amy-OH and stirred at rt. After 12 h, the reaction mixture was extracted water/EA. Then the organic layers were dried with  $\text{Na}_2\text{SO}_4$ , and concentrated to dryness. The crude product was purified by silica gel chromatography (silica gel, PE: EA = 100:1, v/v) to afford 25.0 mg of the product as a slight yellow solid (70%).  $^1\text{H}$  NMR (500 MHz,  $\text{CDCl}_3$ )  $\delta$  7.80 (t,  $J$  = 8.7 Hz, 2H),



7.74 – 7.68 (m, 2H), 7.48 (p,  $J = 6.9$  Hz, 2H), 7.21 (d,  $J = 8.8$  Hz, 1H), 7.08 (s, 4H), 6.89 – 6.70 (m, 2H), 6.60 – 6.50 (m, 2H), 3.51 (q,  $J = 12.7$  Hz, 2H), 2.35 (s, 3H), 1.61 (s, 3H).  $^{13}\text{C}$  NMR (125 MHz,  $\text{CDCl}_3$ )  $\delta$  161.4 (d,  $J = 242.4$  Hz), 146.4, 145.7, 135.4, 133.7 (d,  $J = 3.2$  Hz), 133.0, 132.0 (d,  $J = 7.8$  Hz), 131.8, 130.6, 128.7, 128.0, 127.6, 127.4 (d,  $J = 13.4$  Hz), 125.9, 125.6, 124.9, 114.2, 114.0, 46.9, 46.5, 26.8, 20.9.  $^{19}\text{F}$  NMR (471 MHz,  $\text{CDCl}_3$ )  $\delta$  -117.5. HRMS (EI)  $m/z$ : calcd for:  $\text{C}_{26}\text{H}_{24}\text{O}$ : 354.1784; Found: 354.1794.

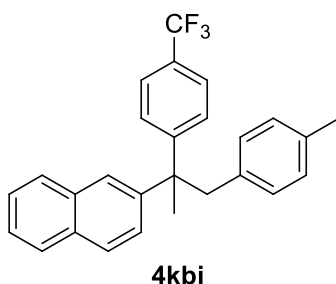

**2-(1-(*p*-tolyl)-2-(4-(trifluoromethyl)phenyl)propan-2-yl)naphthalene (4kbi).** The optimized procedure was followed by using 33.6 mg of 2-(prop-1-en-2-yl)naphthalene (**1k**) (0.20 mmol), 41.2 mg of *p*-tolyl diazonium tetrafluoroborate (**2b**) (0.20 mmol), 45.6 mg of 4-(trifluoromethyl)phenylboronic acid (**3i**) (0.24 mmol), 9.2 mg of  $\text{Pd}_2(\text{dba})_3$  (0.01 mmol), 17.8 mg of lithium carbonate (0.24 mmol) and 1.0 mL of *t*-Amy-OH and stirred at rt. After 12 h, the reaction mixture was extracted water/EA. Then the organic layers were dried with  $\text{Na}_2\text{SO}_4$ , and concentrated to dryness. The crude product was purified by silica gel chromatography (silica gel, PE: EA = 200:1, v/v) to afford 66.1 mg of the product as a slight yellow oil (82%).  $^1\text{H}$  NMR (500 MHz,  $\text{CDCl}_3$ )  $\delta$  7.83 (dd,  $J = 8.8, 5.6$  Hz, 2H), 7.75 (d,  $J = 9.4$  Hz, 2H), 7.54 – 7.48 (m, 4H), 7.31 (d,  $J = 8.2$  Hz, 2H), 7.17 (dd,  $J = 8.6, 1.9$  Hz, 1H), 6.88 (d,  $J = 7.8$  Hz, 2H), 6.52 (d,  $J = 7.9$  Hz, 2H), 3.58 (d,  $J = 12.6$  Hz, 1H), 3.51 (d,  $J = 12.6$  Hz, 1H), 2.26 (s, 3H), 1.68 (s, 3H).  $^{13}\text{C}$  NMR (125 MHz,  $\text{CDCl}_3$ )  $\delta$  153.2, 145.7, 135.7, 134.1, 133.0, 131.9, 130.5, 128.2, 128.2, 128.0, 127.7, 127.4, 127.2, 126.1, 125.8, 125.6 (q,  $J = 272.3$  Hz), 125.1, 124.8 (q,  $J = 3.7$  Hz), 47.5, 46.8, 26.8, 20.9.  $^{19}\text{F}$  NMR (471 MHz,  $\text{CDCl}_3$ )  $\delta$  -62.2. HRMS (EI)  $m/z$ : calcd for:  $\text{C}_{27}\text{H}_{23}\text{F}_3$ : 404.1752; Found: 404.1749.

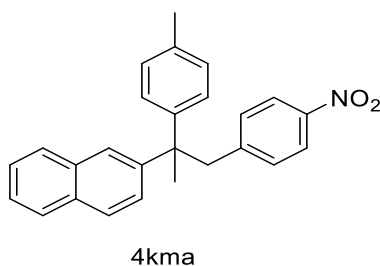

**2-(1-(4-nitrophenyl)-2-(*p*-tolyl)propan-2-yl)naphthalene (4kma).** The optimized procedure was followed by using 33.6 mg of 2-(prop-1-en-2-yl)naphthalene (**1k**) (0.20 mmol), 47.4 mg of 4-nitrophenyl diazonium tetrafluoroborate (**2m**) (0.20 mmol), 32.6 mg of *p*-tolylboronic acid (**3a**) (0.24 mmol), 9.2 mg of  $\text{Pd}_2(\text{dba})_3$  (0.01 mmol), 17.8 mg of lithium carbonate (0.24 mmol) and 1 mL of *t*-Amy-OH and stirred at rt. After 12 h, the reaction mixture was extracted water/EA. Then the organic layers were dried with  $\text{Na}_2\text{SO}_4$ , and concentrated to dryness. The crude product was purified by silica gel chromatography (silica gel, PE: EA = 40:1, v/v) to afford 40.6 mg of the product as a slight yellow oil (53%).  $^1\text{H}$  NMR (500 MHz,  $\text{CDCl}_3$ )  $\delta$  7.89 (d,  $J = 8.6$  Hz, 2H), 7.82



– 7.79 (m, 1H), 7.78 – 7.75 (m, 1H), 7.72 (d,  $J = 8.7$  Hz, 1H), 7.68 (s, 1H), 7.50 – 7.46 (m, 2H), 7.18 (dd,  $J = 8.6, 1.7$  Hz, 1H), 7.06 (q,  $J = 8.3$  Hz, 4H), 6.76 (d,  $J = 8.6$  Hz, 2H), 3.62 (q,  $J = 12.3$  Hz, 2H), 2.33 (s, 3H), 1.56 (s, 3H).  $^{13}\text{C}$  NMR (125 MHz,  $\text{CDCl}_3$ )  $\delta$  146.4, 146.2, 145.9, 145.7, 144.9, 135.7, 131.7, 131.3, 128.7, 127.9, 127.7, 127.4, 127.3, 127.1, 126.0, 125.7, 124.6, 122.4, 47.2, 47.0, 26.8, 20.8. HRMS (EI)  $m/z$ : calcd for:  $\text{C}_{26}\text{H}_{23}\text{NO}_2$ : 381.1729; Found: 381.1732.

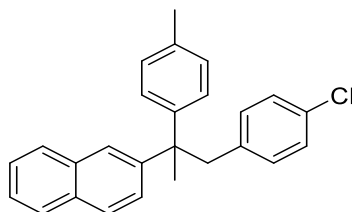

4kfa

**2-(1-(4-chlorophenyl)-2-(*p*-tolyl)propan-2-yl)naphthalene (4kfa).** The optimized procedure was followed by using 33.6 mg of 2-(prop-1-en-2-yl)naphthalene (**1k**) (0.20 mmol), 45.4 mg of 4-chlorophenyldiazonium tetrafluoroborate (**2f**) (0.20 mmol), 32.6 mg of *p*-tolylboronic acid (**3a**) (0.24 mmol), 9.2 mg of  $\text{Pd}_2(\text{dba})_3$  (0.01 mmol), 17.8 mg of lithium carbonate (0.24 mmol) and 1 mL of *t*-Amy-OH and stirred at rt. After 12 h, the reaction mixture was extracted water/EA. Then the organic layers were dried with  $\text{Na}_2\text{SO}_4$ , and concentrated to dryness. The crude product was purified by silica gel chromatography (silica gel, PE: EA = 100:1, v/v) to afford 26.1 mg of the product as a slight yellow oil (35%).  $^1\text{H}$  NMR (500 MHz,  $\text{CDCl}_3$ )  $\delta$  7.79 (dd,  $J = 7.1, 4.7$  Hz, 2H), 7.71 (d,  $J = 8.0$  Hz, 2H), 7.51 – 7.44 (m, 2H), 7.20 (ddd,  $J = 8.5, 5.8, 2.5$  Hz, 1H), 7.06 (s, 4H), 7.04 – 6.98 (m, 2H), 6.54 (dd,  $J = 8.3, 2.7$  Hz, 2H), 3.50 (q,  $J = 12.6$  Hz, 2H), 2.33 (s, 3H), 1.59 (s, 3H).  $^{13}\text{C}$  NMR (125 MHz,  $\text{CDCl}_3$ )  $\delta$  146.3, 145.6, 136.5, 135.5, 133.0, 132.4, 132.0, 131.8, 131.8, 128.7, 128.0, 127.6, 127.5, 127.4, 127.4, 125.9, 125.6, 124.8, 46.9, 46.7, 26.8, 20.9. HRMS (EI)  $m/z$ : calcd for:  $\text{C}_{26}\text{H}_{23}\text{Cl}$ : 370.1488; Found: 370.1486.

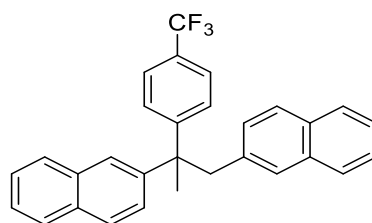

4koi

**2,2'-(2-(4-(trifluoromethyl)phenyl)propane-1,2-diyl)dinaphthalene (4koi).** The optimized procedure was followed by using 33.6 mg of 2-(prop-1-en-2-yl)naphthalene (**1k**) (0.20 mmol), 48.4 mg of 2-naphthalenediazonium tetrafluoroborate (**2o**) (0.20 mmol), 45.6 mg of (4-(trifluoromethyl)phenyl)boronic acid (**3i**) (0.24 mmol), 9.2 mg of  $\text{Pd}_2(\text{dba})_3$  (0.01 mmol), 17.8 mg of lithium carbonate (0.24 mmol) and 1.0 mL of *t*-Amy-OH and stirred at rt. After further 12 h, the reaction mixture was extracted water/EA. Then the organic layers were dried with  $\text{Na}_2\text{SO}_4$ , and concentrated to dryness. The crude product was purified by silica gel chromatography (silica gel, PE: EA = 200:1, v/v) to afford 70.8 mg of the product as a slight yellow oil (80%).  $^1\text{H}$  NMR (500 MHz,  $\text{CDCl}_3$ )  $\delta$  7.88 – 7.84 (m, 1H), 7.80 (dt,  $J = 12.8, 6.1$  Hz, 3H), 7.75 (dd,  $J = 5.6, 3.7$  Hz, 1H), 7.62 – 7.58 (m, 1H), 7.52 (dt,  $J = 12.3, 8.6$  Hz, 5H), 7.44 – 7.40 (m, 2H), 7.32 (d,  $J = 8.2$  Hz, 2H), 7.23 – 7.18 (m, 2H), 6.62 (dd,  $J = 8.4, 1.5$  Hz, 1H), 3.78 (d,  $J = 12.5$  Hz, 1H), 3.71 (d,  $J =$



12.5 Hz, 1H), 1.73 (s, 3H).  $^{13}\text{C}$  NMR (126 MHz,  $\text{CDCl}_3$ )  $\delta$  153.0, 145.6, 135.0, 133.0, 132.9, 132.0, 131.9, 129.4, 129.0, 128.3, 128.1, 127.8, 127.5, 127.4, 127.4, 127.2, 126.7, 126.1, 125.9, 125.8 (q,  $J = 213.8$  Hz), 125.7, 125.4, 125.1, 124.8 (q,  $J = 3.6$  Hz), 47.8, 47.5, 26.8.  $^{19}\text{F}$  NMR (471 MHz,  $\text{CDCl}_3$ )  $\delta$  -62.2. HRMS (EI)  $m/z$ : calcd for:  $\text{C}_{30}\text{H}_{23}\text{F}_3$ : 440.1752; Found: 440.1747.

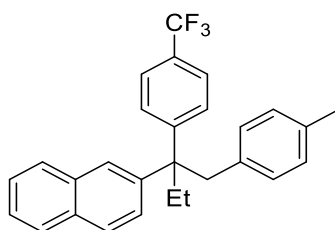

4lbi

**2-(1-(*p*-tolyl)-2-(4-(trifluoromethyl)phenyl)butan-2-yl)naphthalene (4lbi).** The optimized procedure was followed by using 36.4 mg of 2-(but-1-en-2-yl)naphthalene (**1l**) (0.20 mmol), 41.2 mg of *p*-tolyl diazonium tetrafluoroborate (**2b**) (0.20 mmol), 45.6 mg of (4-(trifluoromethyl)phenyl)boronic acid (**3i**) (0.24 mmol), 9.2 mg of  $\text{Pd}_2(\text{dba})_3$  (0.01 mmol), 17.8 mg of lithium carbonate (0.24 mmol) and 1 mL of *t*-Amy-OH and stirred at rt. After further 12 h, the reaction mixture was extracted water/EA. Then the organic layers were dried with  $\text{Na}_2\text{SO}_4$ , and concentrated to dryness. The crude product was purified by silica gel chromatography (silica gel, PE: EA = 100:1, v/v) to afford 41.1 mg of the product as a slight yellow oil (49%).  $^1\text{H}$  NMR (500 MHz,  $\text{CDCl}_3$ )  $\delta$  7.81 (dd,  $J = 6.4, 2.8$  Hz, 2H), 7.75 – 7.70 (m, 2H), 7.52 – 7.46 (m, 4H), 7.22 (d,  $J = 8.2$  Hz, 2H), 7.07 (dd,  $J = 8.7, 1.8$  Hz, 1H), 6.85 (d,  $J = 7.8$  Hz, 2H), 6.43 (d,  $J = 7.9$  Hz, 2H), 3.55 (d,  $J = 12.8$  Hz, 1H), 3.43 (d,  $J = 12.8$  Hz, 1H), 2.24 (s, 3H), 2.18 – 2.06 (m, 2H), 0.79 (t,  $J = 7.3$  Hz, 3H).  $^{13}\text{C}$  NMR (125 MHz,  $\text{CDCl}_3$ )  $\delta$  152.4, 144.7, 135.7, 134.0, 132.9, 131.9, 130.2, 128.9, 128.2, 128.1, 128.1, 127.7, 127.6, 127.4, 126.7 (q,  $J = 294.9$  Hz), 126.0 (d,  $J = 2.2$  Hz), 125.8, 124.6 (q,  $J = 3.6$  Hz), 123.2, 51.2, 42.1, 28.4, 21.0, 8.9.  $^{19}\text{F}$  NMR (471 MHz,  $\text{CDCl}_3$ )  $\delta$  -62.2. HRMS (EI)  $m/z$ : calcd for:  $\text{C}_{28}\text{H}_{25}\text{F}_3$ : 418.1908; Found: 418.1905.

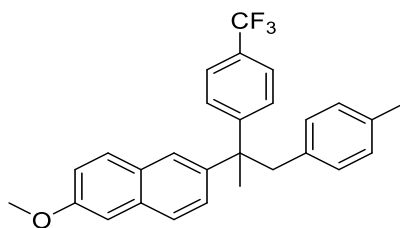

4mbi

**2-methoxy-6-(1-(*p*-tolyl)-2-(4-(trifluoromethyl)phenyl)propan-2-yl)naphthalene (4mbi).** The optimized procedure was followed by using 39.8 mg of 2-methoxy-6-(prop-1-en-2-yl)naphthalene (**1m**) (0.20 mmol), 41.2 mg of *p*-tolyl diazonium tetrafluoroborate (**2b**) (0.20 mmol), 45.6 mg of (4-(trifluoromethyl)phenyl)boronic acid (**3i**) (0.24 mmol), 9.2 mg of  $\text{Pd}_2(\text{dba})_3$  (0.01 mmol), 17.8 mg of lithium carbonate (0.24 mmol) and 1 mL of *t*-Amy-OH and stirred at rt. After further 12 h, the reaction mixture was extracted water/EA. Then the organic layers were dried with  $\text{Na}_2\text{SO}_4$ , and concentrated to dryness. The crude product was purified by silica gel chromatography (silica gel, PE: EA = 100:1, v/v) to afford 51.2 mg of the product as a pale yellow oil (59%).  $^1\text{H}$  NMR (500 MHz,  $\text{CDCl}_3$ )  $\delta$  7.70 (d,  $J = 8.9$  Hz, 1H), 7.67 – 7.63 (m, 2H), 7.52 (dd,  $J = 13.2, 8.4$  Hz, 2H), 7.30 (t,  $J = 7.2$  Hz, 2H), 7.18 – 7.15 (m, 1H), 7.12 (d,  $J = 6.7$  Hz, 2H), 6.87 (d,  $J = 7.8$  Hz, 2H),



6.50 (d,  $J = 7.8$  Hz, 2H), 3.93 (s, 3H), 3.58 – 3.45 (m, 2H), 2.25 (s, 3H), 1.64 (s, 3H).  $^{13}\text{C}$  NMR (125 MHz,  $\text{CDCl}_3$ )  $\delta$  157.7, 153.4, 143.4, 135.6, 134.2, 132.9, 130.9, 130.5, 129.6, 129.0 (d,  $J = 32.3$  Hz), 128.4, 128.2, 128.2, 127.7, 126.6, 124.9, 124.74 (q,  $J = 3.7$  Hz), 118.7, 105.5, 55.3, 47.3, 46.9, 26.8, 20.9.  $^{19}\text{F}$  NMR (471 MHz,  $\text{CDCl}_3$ )  $\delta$  -62.2. HRMS (EI)  $m/z$ : calcd for:  $\text{C}_{28}\text{H}_{25}\text{F}_3\text{O}$ : 434.1858; Found: 434.1857.

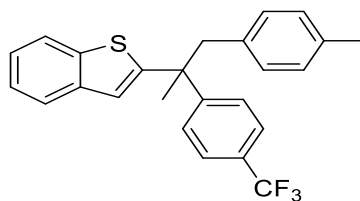

4nbi

**2-(1-(*p*-tolyl)-2-(4-(trifluoromethyl)phenyl)propan-2-yl)benzo[*b*]thiophene (4nbi).** The optimized procedure was followed by using 34.8 mg of 2-(prop-1-en-2-yl)benzo[*b*]thiophene (**1n**) (0.20 mmol), 41.2 mg of *p*-tolyl diazonium tetrafluoroborate (**2b**) (0.20 mmol), 45.6 mg of (4-(trifluoromethyl)phenyl)boronic acid (**3i**) (0.24 mmol), 9.2 mg of  $\text{Pd}_2(\text{dba})_3$  (0.01 mmol), 17.8 mg of lithium carbonate (0.24 mmol) and 1 mL of *t*-Amy-OH and stirred at rt. After further 12 h, the reaction mixture was extracted water/EA. Then the organic layers were dried with  $\text{Na}_2\text{SO}_4$ , and concentrated to dryness. The crude product was purified by silica gel chromatography (silica gel, PE: EA = 100:1, v/v) to afford 44.4 mg of the product as a yellow oil (54%).  $^1\text{H}$  NMR (500 MHz,  $\text{CDCl}_3$ )  $\delta$  7.76 (dd,  $J = 7.8, 3.5$  Hz, 1H), 7.71 (d,  $J = 7.8$  Hz, 1H), 7.56 (dd,  $J = 15.1, 8.3$  Hz, 2H), 7.42 (d,  $J = 9.6$  Hz, 1H), 7.40 – 7.33 (m, 2H), 7.32 – 7.28 (m, 1H), 7.11 (d,  $J = 11.6$  Hz, 1H), 6.90 (dd,  $J = 33.8, 7.9$  Hz, 2H), 6.63 (d,  $J = 7.9$  Hz, 2H), 3.55 (dt,  $J = 24.6, 8.5$  Hz, 2H), 2.28 (s, 3H), 1.72 (s, 3H).  $^{13}\text{C}$  NMR (125 MHz,  $\text{CDCl}_3$ )  $\delta$  155.1, 151.3, 139.4, 136.1, 133.5, 130.8, 130.4, 128.4, 127.7, 127.6, 124.9 (q,  $J = 3.7$  Hz), 124.2, 124.0, 123.3, 122.2, 122.1, 120.8, 48.2, 46.5, 27.4, 21.0.  $^{19}\text{F}$  NMR (471 MHz,  $\text{CDCl}_3$ )  $\delta$  -62.3. HRMS (EI)  $m/z$ : calcd for:  $\text{C}_{25}\text{H}_{21}\text{F}_3\text{S}$ : 410.1316; Found: 410.1326.

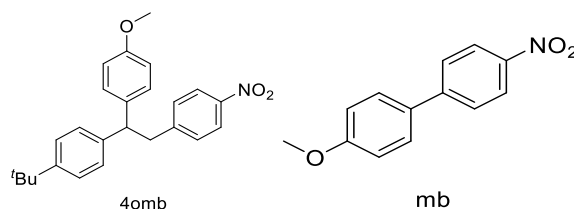

- 1-(*tert*-butyl)-4-(1-(4-methoxyphenyl)-2-(4-nitrophenyl)ethyl)benzene (4omb).** The procedure was followed by using 474 mg of *p*-nitrophenyldiazonium tetrafluoroborate (**2m**) (2.0 mmol), 365 mg of (4-methoxyphenyl)boronic acid (**3b**) (2.4 mmol), 46 mg of  $\text{Pd}_2(\text{dba})_3$  (0.05 mmol), 178 mg of lithium carbonate (2.4 mmol), 160 mg of 1-(*tert*-butyl)-4-vinylbenzene (**1o**) (1 mmol) and 6 mL of *t*-Amy-OH and stirred at 40 °C. After further 12 h, the reaction mixture was extracted water/EA. Then the organic layers were dried with  $\text{Na}_2\text{SO}_4$ , and concentrated to dryness. The crude product was purified by silica gel chromatography (silica gel, PE: EA = 100:3, v/v) to afford 60.5 mg of the product with byproduct (mb) as a yellow solid (7% analyzed by NMR). HRMS (EI)  $m/z$ : calcd for:  $\text{C}_{25}\text{H}_{27}\text{NO}_3$ : 389.1991; Found: 389.1996.



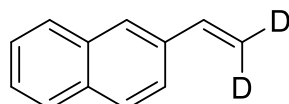

**1a-D<sub>2</sub>**

**2-(vinyl-2,2-*d*<sub>2</sub>)naphthalene (1a-D<sub>2</sub>).**<sup>2</sup> The operation process was on the basis of reference 2. The desired product was got as a white solid (39%, 71% D). And the determination of the rates of deuteration was based on the peak area of <sup>1</sup>H NMR of the corresponding 1H. <sup>1</sup>H NMR (500 MHz, CDCl<sub>3</sub>) δ 7.88 – 7.83 (m, 3H), 7.80 (s, 1H), 7.69 (dd, *J* = 8.5, 1.5 Hz, 1H), 7.54 – 7.47 (m, 2H), 6.97 – 6.91 (m, 1H), 5.96 – 5.90 (m, 0.29H), 5.39 (dd, *J* = 10.9, 7.4 Hz, 0.29H). <sup>13</sup>C NMR (125 MHz, CDCl<sub>3</sub>) δ 136.8 (dd, *J* = 13.7, 10.9 Hz), 134.9, 133.5, 133.1, 128.1, 128.0, 127.6, 126.3, 126.2, 125.9, 123.1, 114.1.

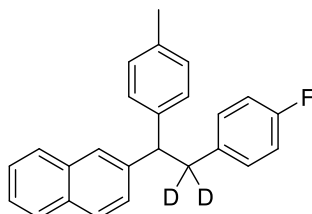

**4aaa-D<sub>2</sub>**

**2-(2-(4-fluorophenyl)-1-(*p*-tolylethyl)-2,2-*d*<sub>2</sub>)naphthalene (4aaa-D<sub>2</sub>).** The optimized procedure was followed by using 31.2 mg of 2-(vinyl-2,2-*d*<sub>2</sub>)naphthalene **1a-D<sub>2</sub>** (0.20 mmol), 42.0 mg of 4-fluorophenyldiazonium tetrafluoroborate (**2a**) (0.20 mmol), 32.6 mg of *p*-tolylboronic acid (**3a**) (0.24 mmol), 9.2 mg of Pd<sub>2</sub>(dba)<sub>3</sub> (0.01 mmol), 17.8 mg of lithium carbonate (0.24 mmol) and 1 mL of *t*-Amy-OH and stirred at rt. After 12 h, the reaction mixture was extracted water/EA. Then the organic layers were dried with Na<sub>2</sub>SO<sub>4</sub>, and concentrated to dryness. The crude product was purified by silica gel chromatography (silica gel, PE: EA = 100:1, v/v) to afford 41.1 mg of the product as a yellowish oil (60%, 2x71% D). <sup>1</sup>H NMR (500 MHz, CDCl<sub>3</sub>) δ 7.78 (dd, *J* = 8.6, 7.3 Hz, 2H), 7.74 (d, *J* = 8.5 Hz, 1H), 7.65 (s, 1H), 7.45 (pd, *J* = 6.8, 1.4 Hz, 2H), 7.33 (dd, *J* = 8.5, 1.3 Hz, 1H), 7.14 (d, *J* = 8.0 Hz, 2H), 7.09 (d, *J* = 8.0 Hz, 2H), 7.00 – 6.95 (m, 2H), 6.91 – 6.80 (m, 2H), 4.37 – 4.29 (m, 1H), 3.48 – 3.38 (m, 0.58H), 2.31 (s, 3H). <sup>13</sup>C NMR (125 MHz, CDCl<sub>3</sub>) δ 161.2 (d, *J* = 243.4 Hz), 141.8, 141.0, 135.8, 133.4, 132.1, 130.4 (d, *J* = 7.8 Hz), 129.1, 127.96 (d, *J* = 8.4 Hz), 127.7, 127.5, 126.8, 125.9 (d, *J* = 10.7 Hz), 125.4, 114.9, 114.7, 52.8, 52.7, 21.0. <sup>19</sup>F NMR (471 MHz, CDCl<sub>3</sub>) δ -117.4. HRMS (EI) *m/z*: calcd for: C<sub>25</sub>H<sub>19</sub>D<sub>2</sub>F:342.1753; Found: 342.1762.

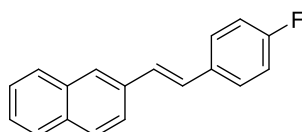

**5**



**(E)-2-(4-fluorostyryl)naphthalene (5).**<sup>3</sup> The optimized procedure was followed by using 303 mg of 2-vinylnaphthalene (**1a**) (2.0 mmol), 420 mg of 4-fluorophenyldiazonium tetrafluoroborate (**2a**) (2.0 mmol), 394 mg of (4-propylphenyl)boronic acid (**3d**) (2.4 mmol), 91.5 mg of Pd<sub>2</sub>(dba)<sub>3</sub> (0.1 mmol), 178 mg of lithium carbonate (2.4 mmol) and 8 mL of *t*-Amy-OH and stirred at rt. After 12 h, the reaction mixture was extracted water/EA. Then the organic layers were dried with Na<sub>2</sub>SO<sub>4</sub>, and concentrated to dryness. The crude product was purified by silica gel chromatography (silica gel, PE: EA = 100:1, v/v) to afford 446 mg of the product as a slight yellow solid (62%) along with 10% of the byproduct (**6**) as a slight yellow oil and 14% of Heck-type product (**5**) as a white solid. <sup>1</sup>H NMR (500 MHz, CDCl<sub>3</sub>) δ 7.84 (dd, *J* = 8.4, 4.1 Hz, 4H), 7.73 (dd, *J* = 8.6, 1.7 Hz, 1H), 7.55 – 7.51 (m, 2H), 7.47 (ddd, *J* = 8.3, 7.2, 1.5 Hz, 2H), 7.20 (s, 2H), 7.12 – 7.06 (m, 2H). <sup>13</sup>C NMR (125 MHz, CDCl<sub>3</sub>) δ 162.3 (d, *J* = 246.3 Hz), 134.6, 133.7, 133.5 (d, *J* = 3.4 Hz), 133.0, 128.5 (d, *J* = 2.4 Hz), 128.3, 128.0, 128.0, 127.7 (d, *J* = 9.2 Hz), 126.6, 126.4, 125.9, 123.4, 115.7, 115.6.

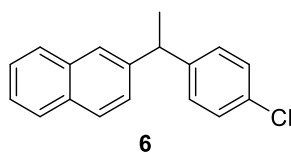

**2-(1-(4-chlorophenyl)ethyl)naphthalene (6).**<sup>4</sup> <sup>1</sup>H NMR (500 MHz, CDCl<sub>3</sub>) δ 7.80 (d, *J* = 8.2 Hz, 2H), 7.75 (d, *J* = 8.5 Hz, 1H), 7.68 (s, 1H), 7.46 (tdd, *J* = 9.3, 6.9, 1.4 Hz, 2H), 7.29 – 7.26 (m, 2H), 7.26 – 7.25 (m, 1H), 7.21 – 7.16 (m, 2H), 4.29 (q, *J* = 7.2 Hz, 1H), 1.72 (d, *J* = 7.2 Hz, 3H). <sup>13</sup>C NMR (125 MHz, CDCl<sub>3</sub>) δ 144.7, 143.2, 133.5, 132.1, 131.8, 129.1, 128.5, 128.1, 127.7, 127.6, 126.6, 126.1, 125.5, 125.3, 44.2, 21.7.



#### 4. Preliminary mechanistic studies

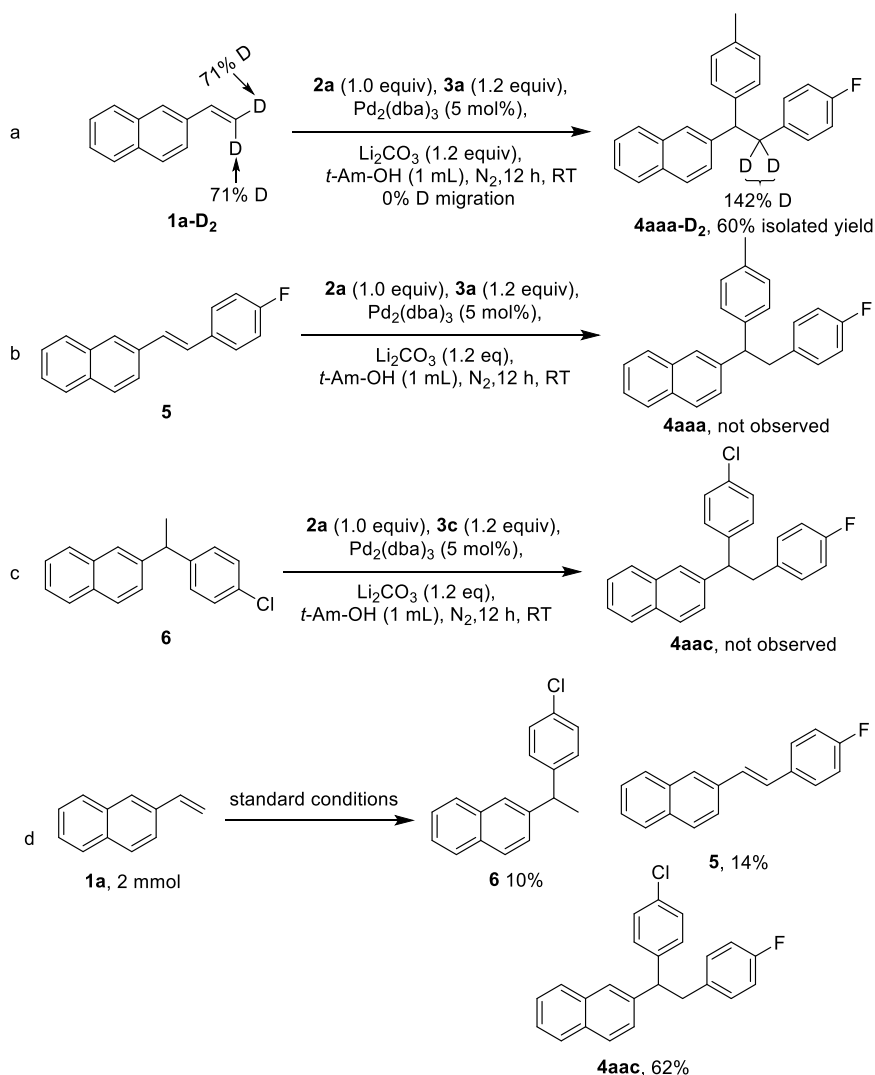

The reaction (eq a) was carried out under the optimized conditions with the D-labeled 2-vinylnaphthalene **1a-D<sub>2</sub>** (71% D). Subsequently, the compound **4aaa-D<sub>2</sub>** was isolated as a yellow oil in 60% yield with 71% D. By deuterium label experiments, we found that the deuterium ratio of  $\beta$  was almost no change, and the  $\alpha$  was no deuterium replacement.

In the process of optimizing conditions, we found the Heck byproduct and hydroarylation byproduct were detected, so we prepared these two products accordingly and subjected them to the standard conditions (compounds **5** and **6** in eq b and eq c), no corresponding desired products were detected. These results suggested that the above two byproducts were not key intermediates for this transformation.

To understand the mechanism of this transformation, a scale-up reaction was conducted with 2 mmol of **1a** with **2a** and **3c** under the standard condition, the corresponding desired product **4aac** was obtained in 62% yield along with 10% of 2-(1-(4-chlorophenyl)ethyl)naphthalene (**6**) and 14% of Heck-type product **5** (eq d), and the structures of both **5** and **6** were verified by corresponding spectroscopic analysis.



**2-(2-(4-fluorophenyl)-1-(*p*-tolyl)ethyl)naphthalene (4aaa)**

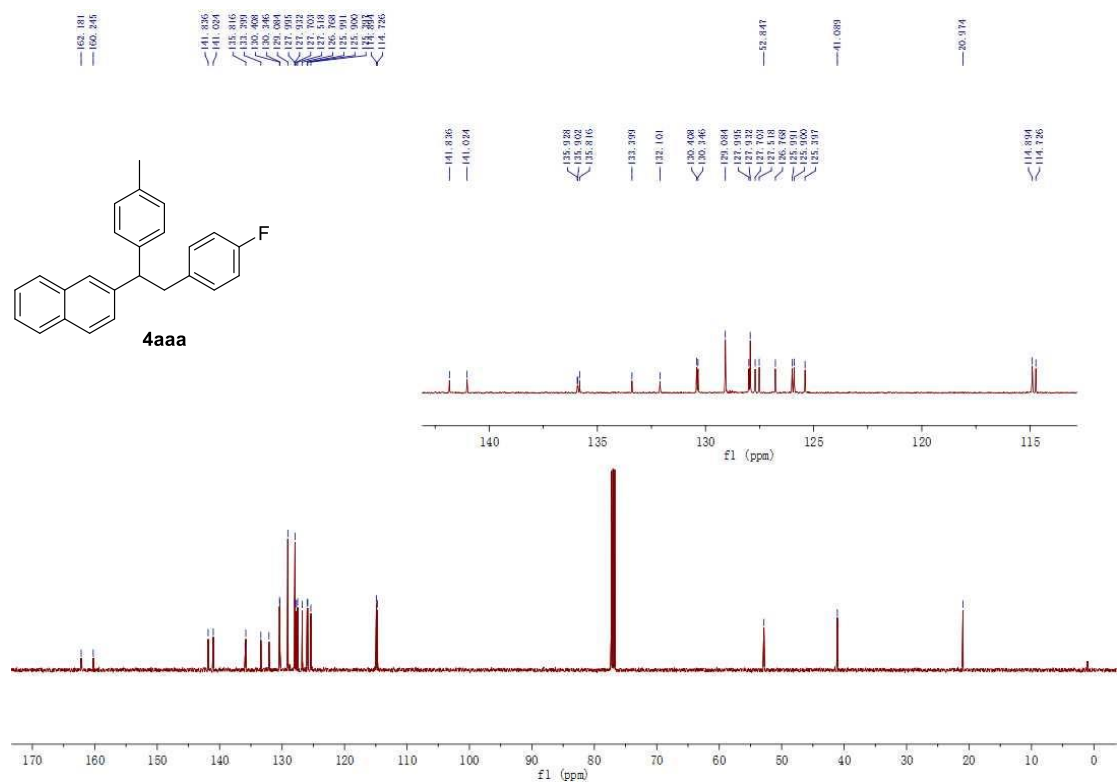



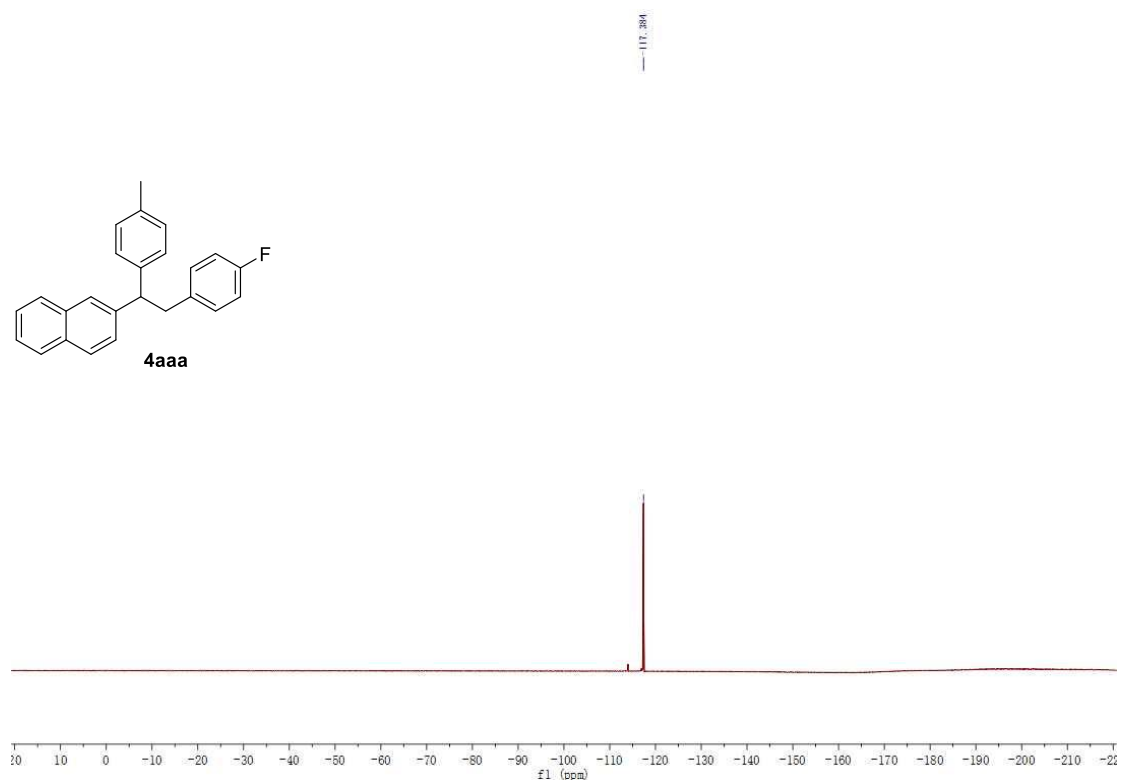

**4aab**

<sup>1</sup>H NMR spectrum (CDCl<sub>3</sub>) of compound **4aab**. The spectrum shows peaks in the aromatic region (6.8–7.8 ppm), a methoxy singlet (3.8 ppm), and aliphatic protons (1.0–2.1 ppm). Integration values are provided below the baseline, and chemical shift ranges for each multiplet are shown above the peaks.



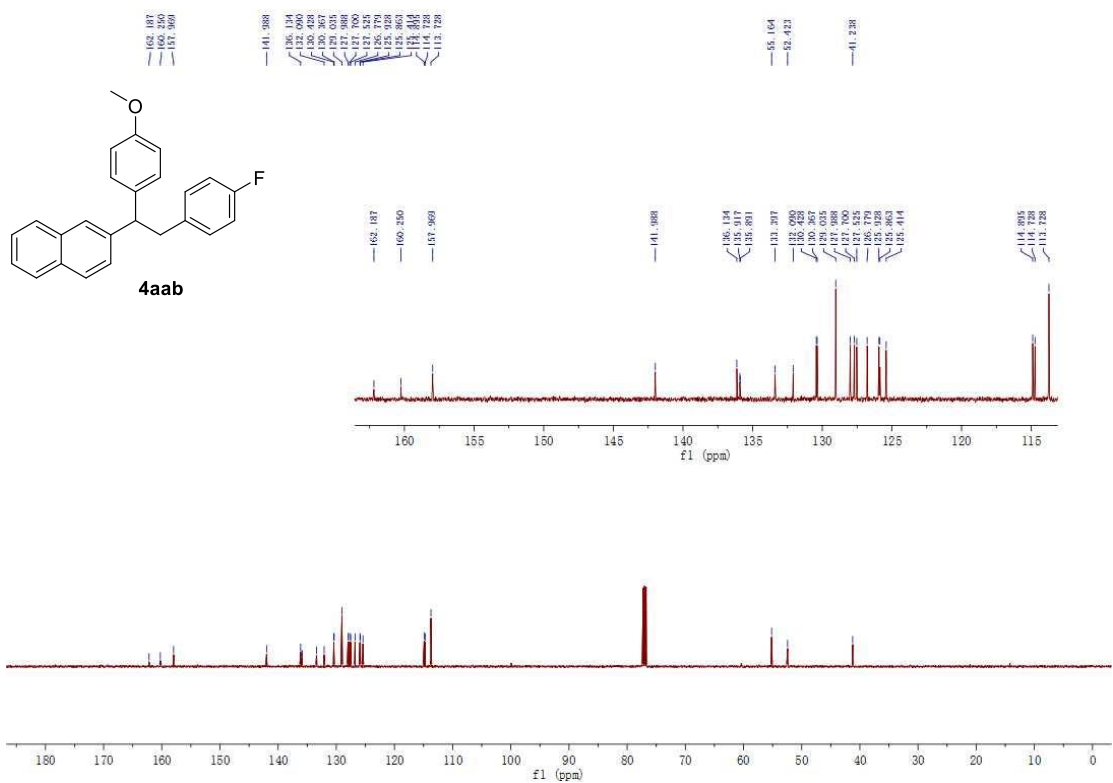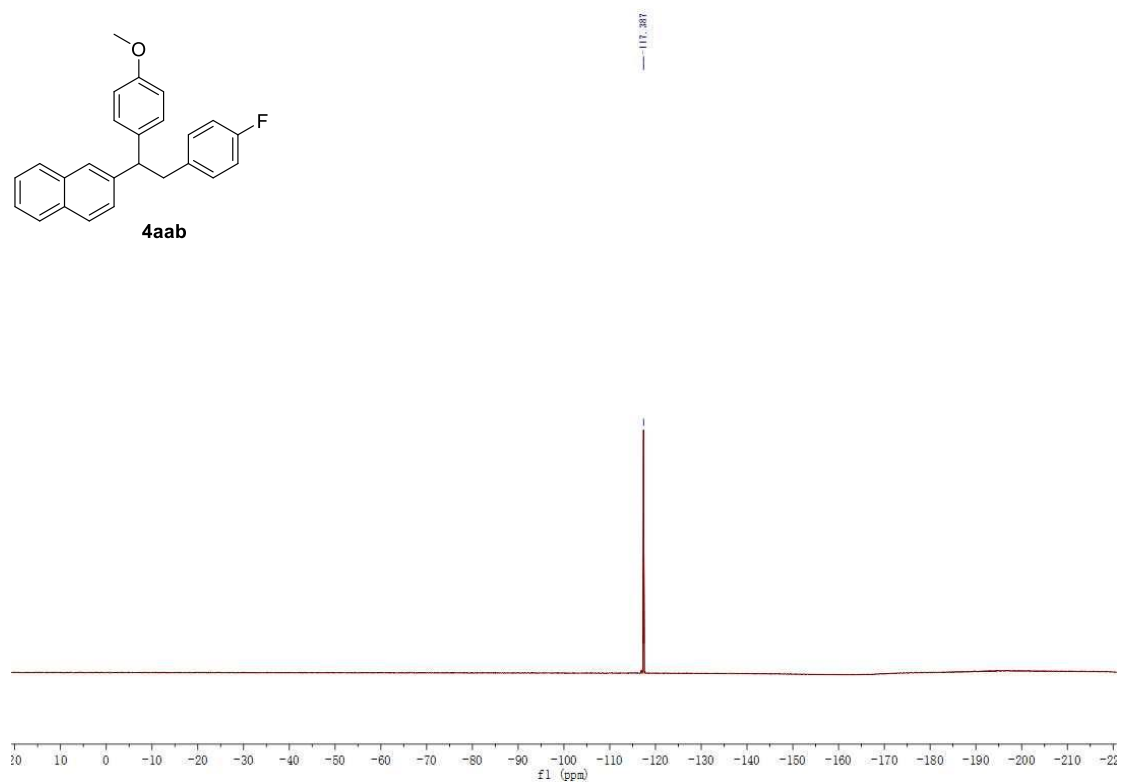



**2-(1-(4-chlorophenyl)-2-(4-fluorophenyl)ethyl)naphthalene (4aac)**

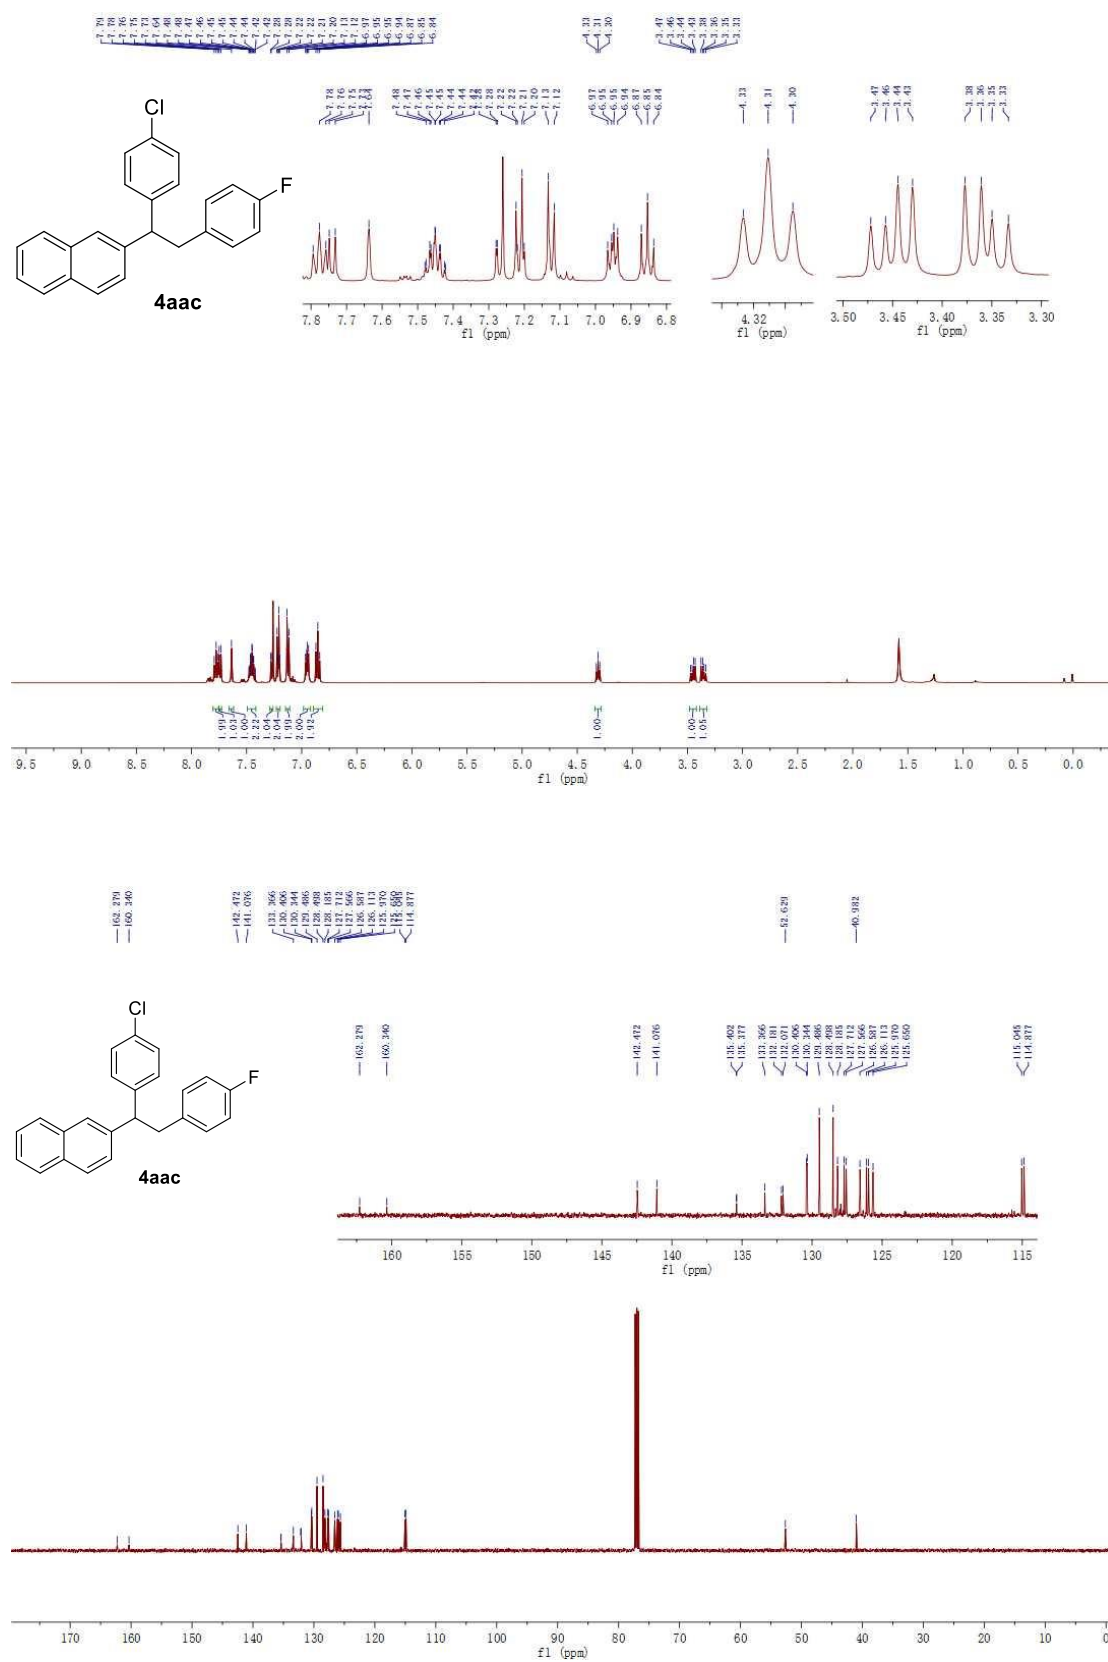



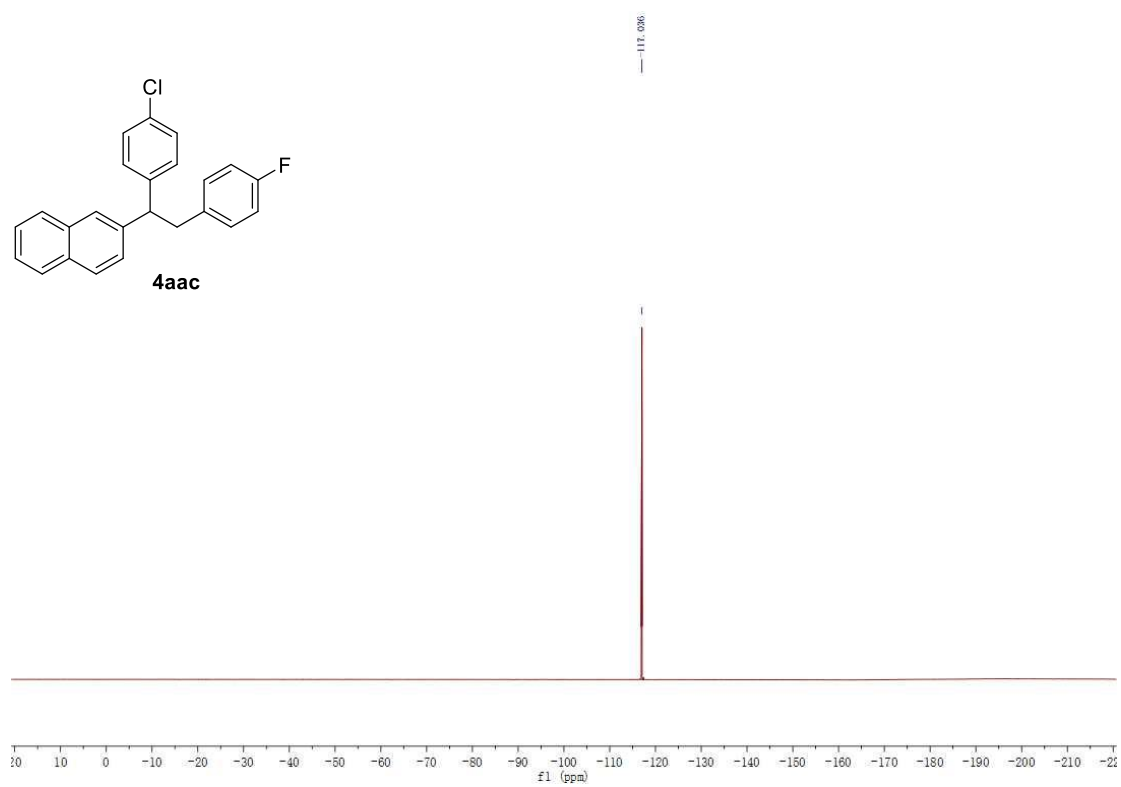



Chemical structure of **4aad** is shown. The <sup>1</sup>H NMR spectrum (CDCl<sub>3</sub>) displays peaks in the aromatic region (6.8–7.8 ppm) and aliphatic region (0.9–3.6 ppm). Integration values are provided for each peak.

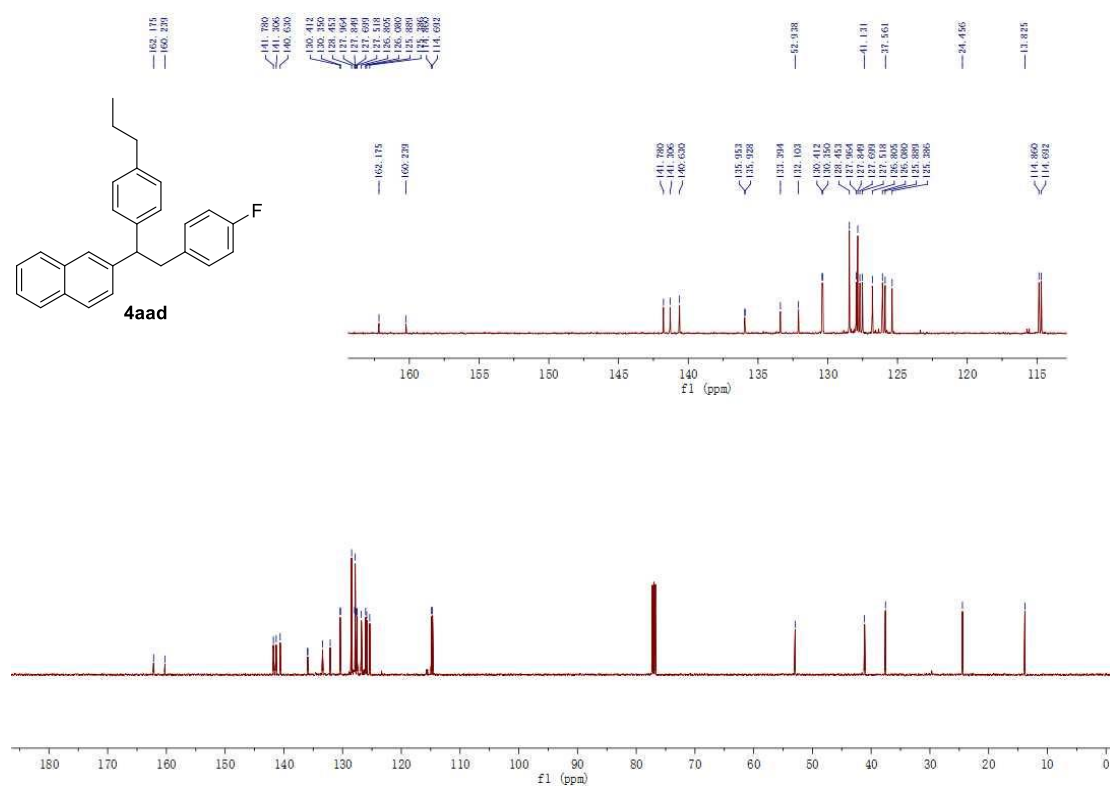



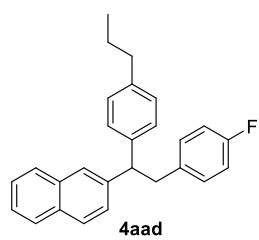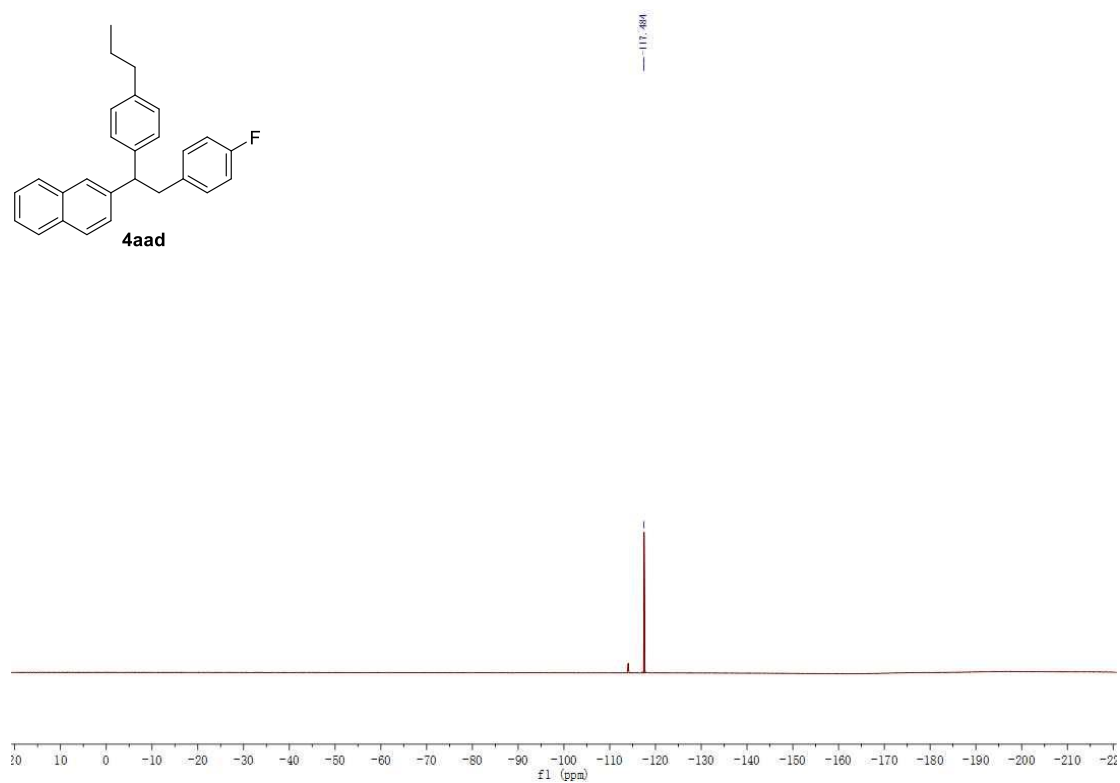



**4aae**

Chemical structure of **4aae** is shown. The <sup>1</sup>H NMR spectrum (CDCl<sub>3</sub>) displays peaks in the aromatic region (6.8–7.8 ppm) and aliphatic region (2.3–2.9 ppm). Integration values are indicated above the peaks.

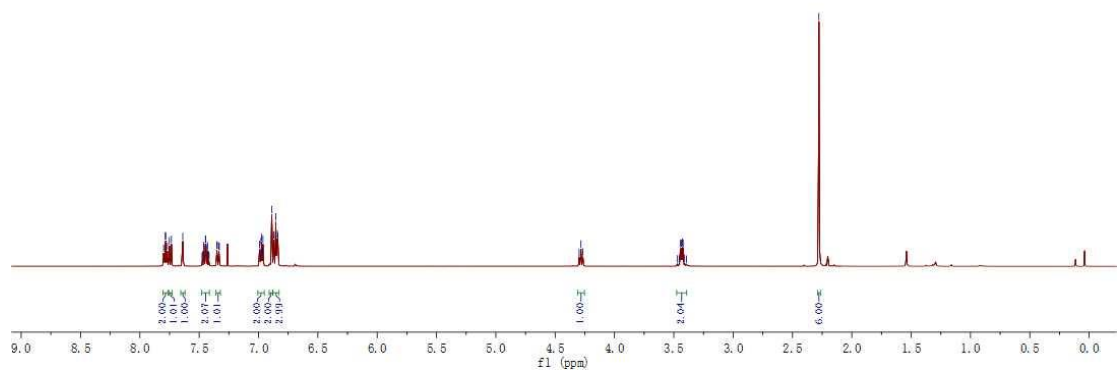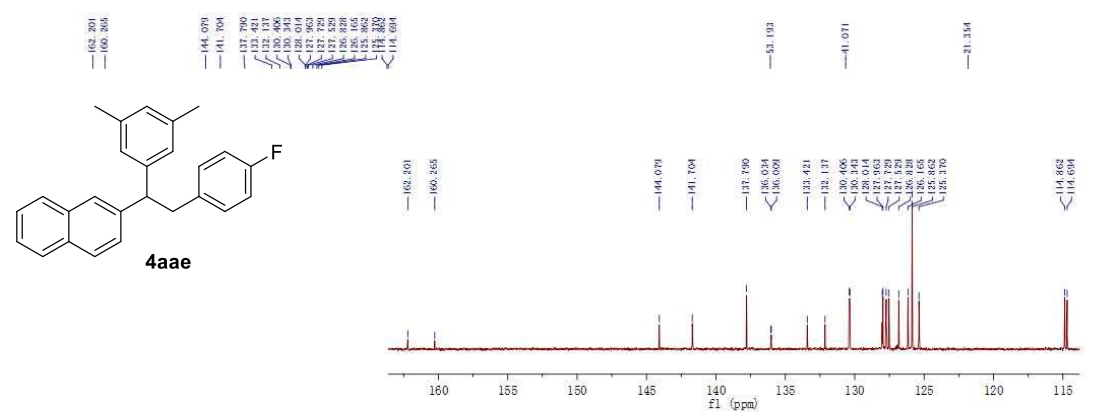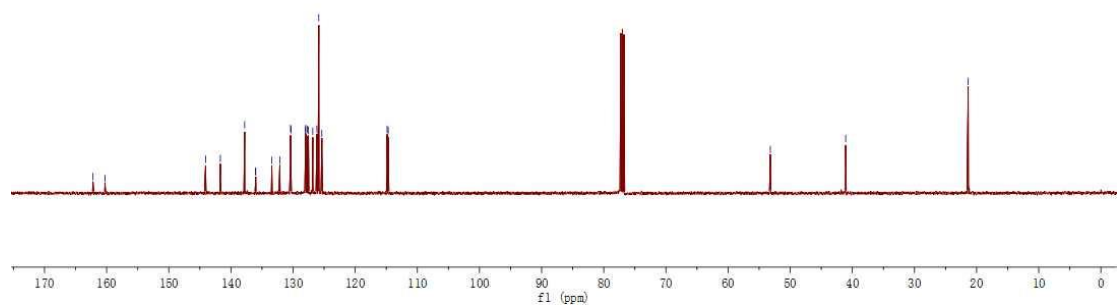



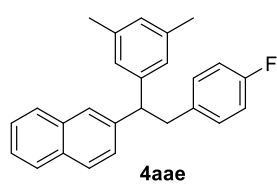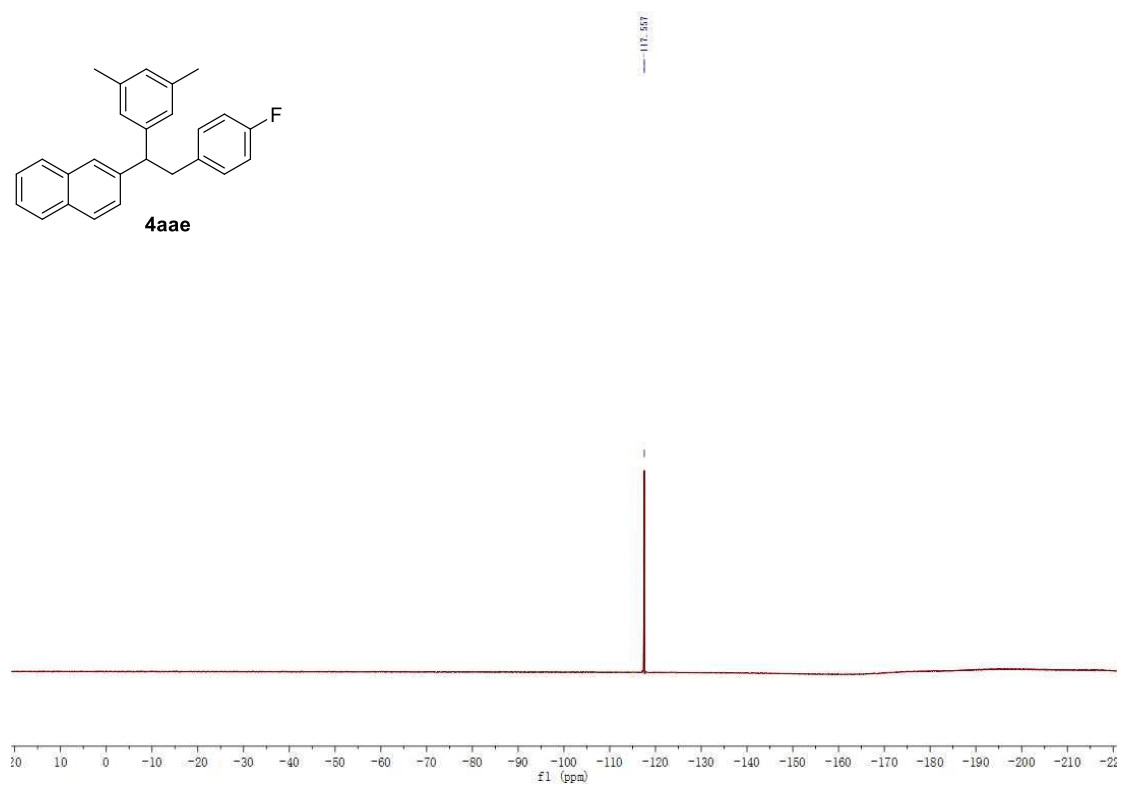



Chemical structure of **4aaf** is shown. The <sup>1</sup>H NMR spectrum (CDCl<sub>3</sub>) displays peaks from 2.384 to 7.801 ppm. Integration values are provided for several peak groups.

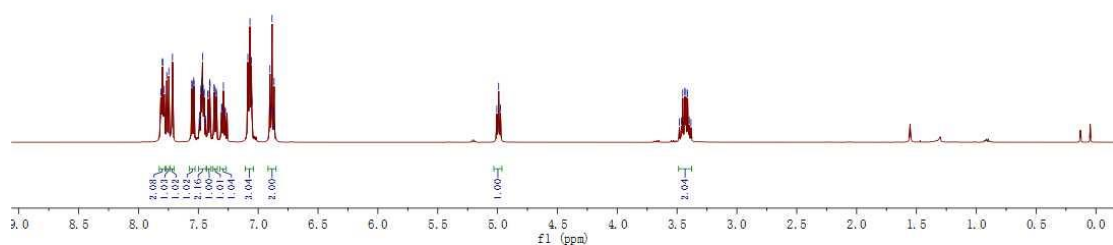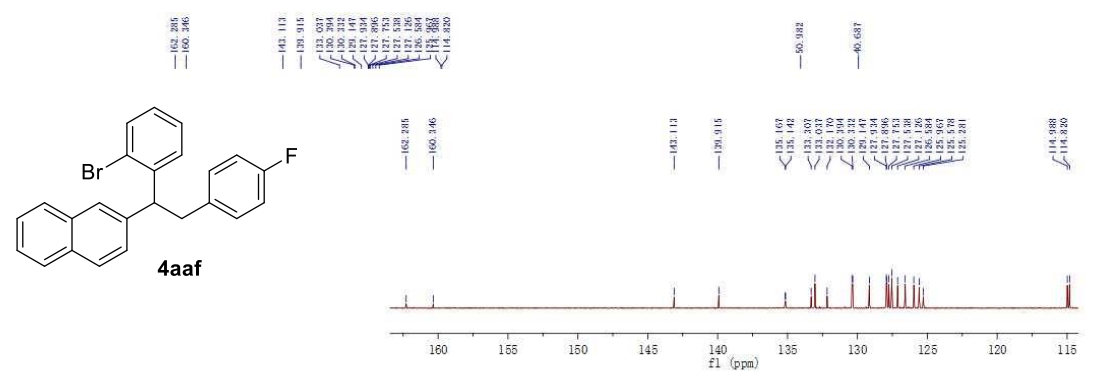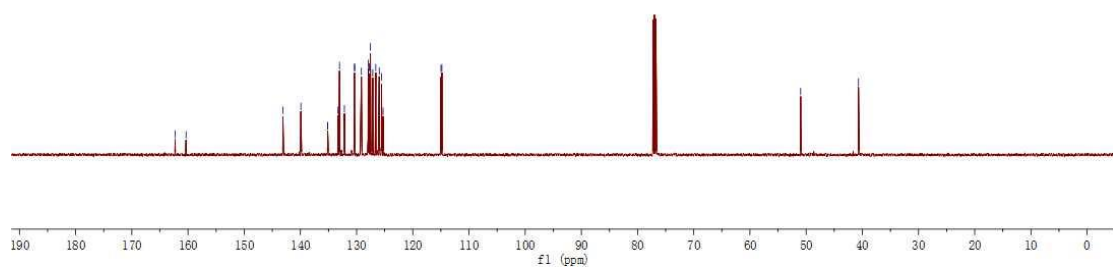



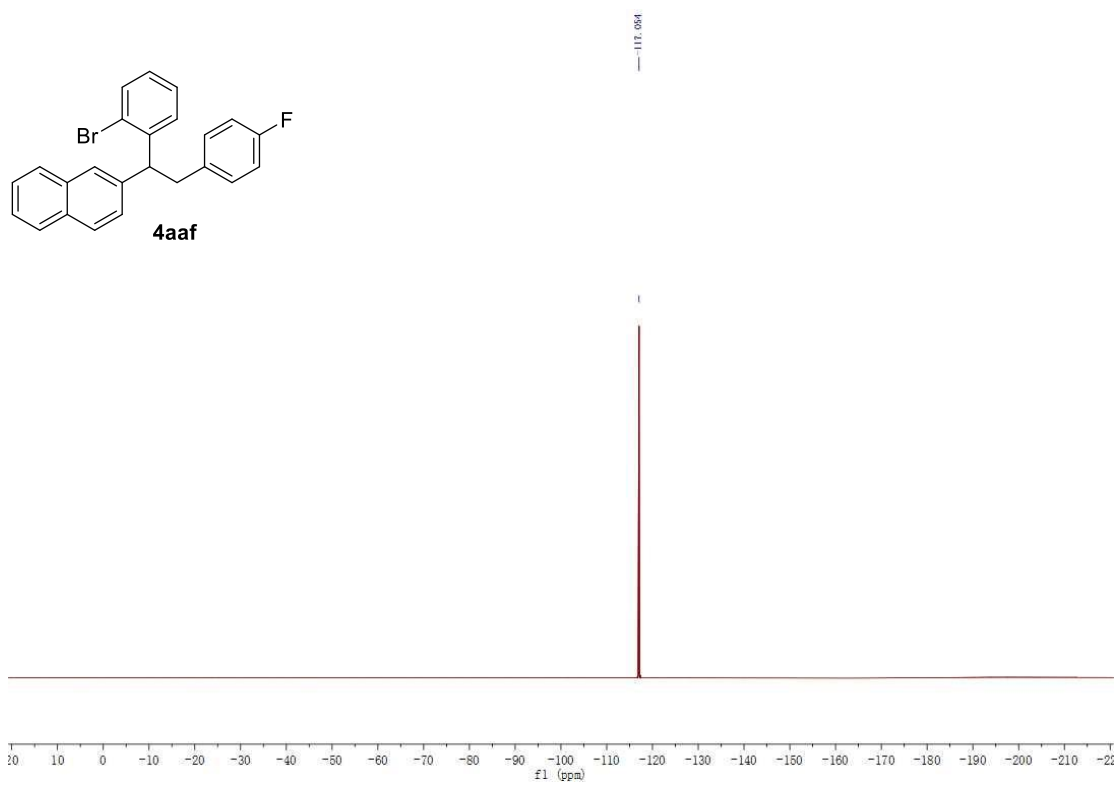



**Chemical structure of 4aag:** Cc1ccccc1C(c2ccccc2)Cc3ccc(F)cc3

**<sup>1</sup>H NMR spectrum (400 MHz, CDCl<sub>3</sub>):**

- Chemical shift range: 0.0 to 8.5 ppm.
- Integration values: 1.01, 0.99, 3.01, 2.00, 1.01, 1.00, 1.94, 1.00, 2.06, 3.00.
- Peak list (ppm): 7.77, 7.72, 7.71, 7.60, 7.54, 7.44, 7.43, 7.42, 7.40, 7.25, 7.18, 7.15, 7.14, 7.12, 7.10, 7.09, 6.94, 6.93, 6.92, 6.91, 6.86, 6.83, 4.54, 4.51, 3.45, 3.43, 3.41, 3.40, 3.38, 3.37, 2.14.

**<sup>13</sup>C NMR spectrum (100 MHz, CDCl<sub>3</sub>):**

- Chemical shift range: 10 to 160 ppm.
- Peak list (ppm): 162.268, 160.329, 142.099, 141.132, 136.472, 135.452, 134.306, 132.825, 127.695, 127.096, 127.055, 126.111, 126.291, 126.080, 125.884, 114.726, 114.394, 114.126, 88.371, 41.316, 19.835.



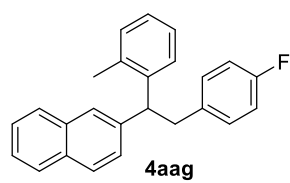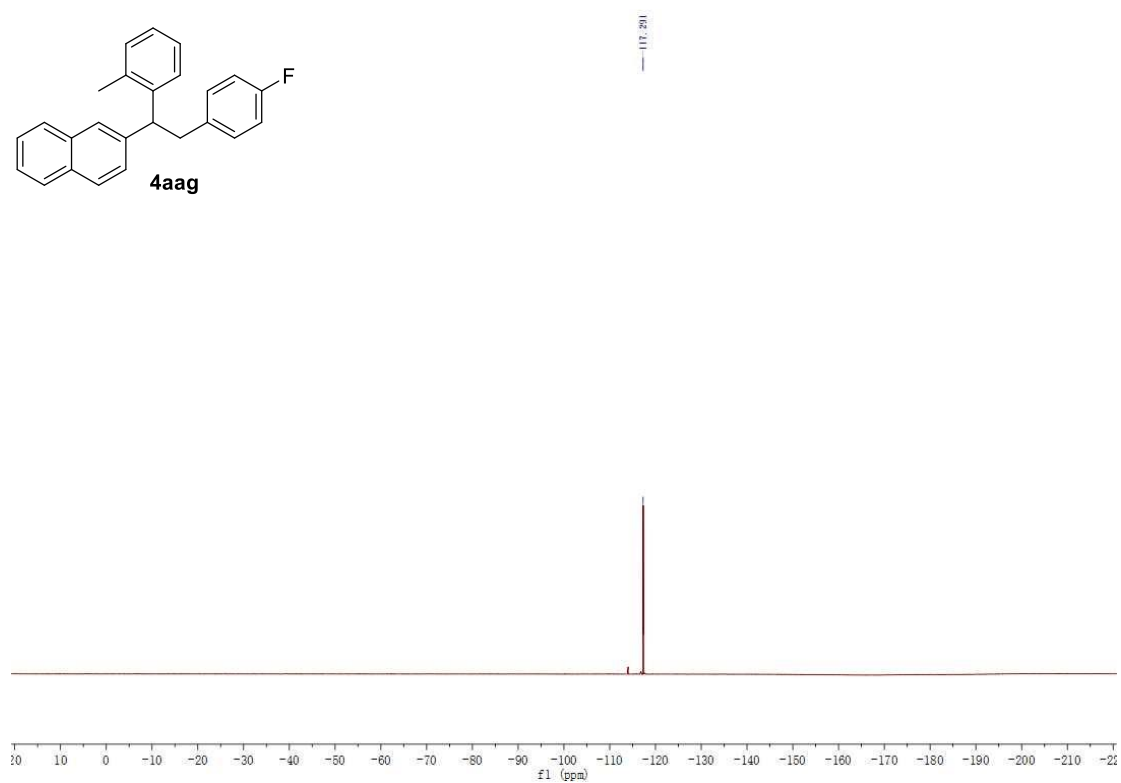



## 2-(2-(4-fluorophenyl)-1-phenylethyl)naphthalene (4aah)

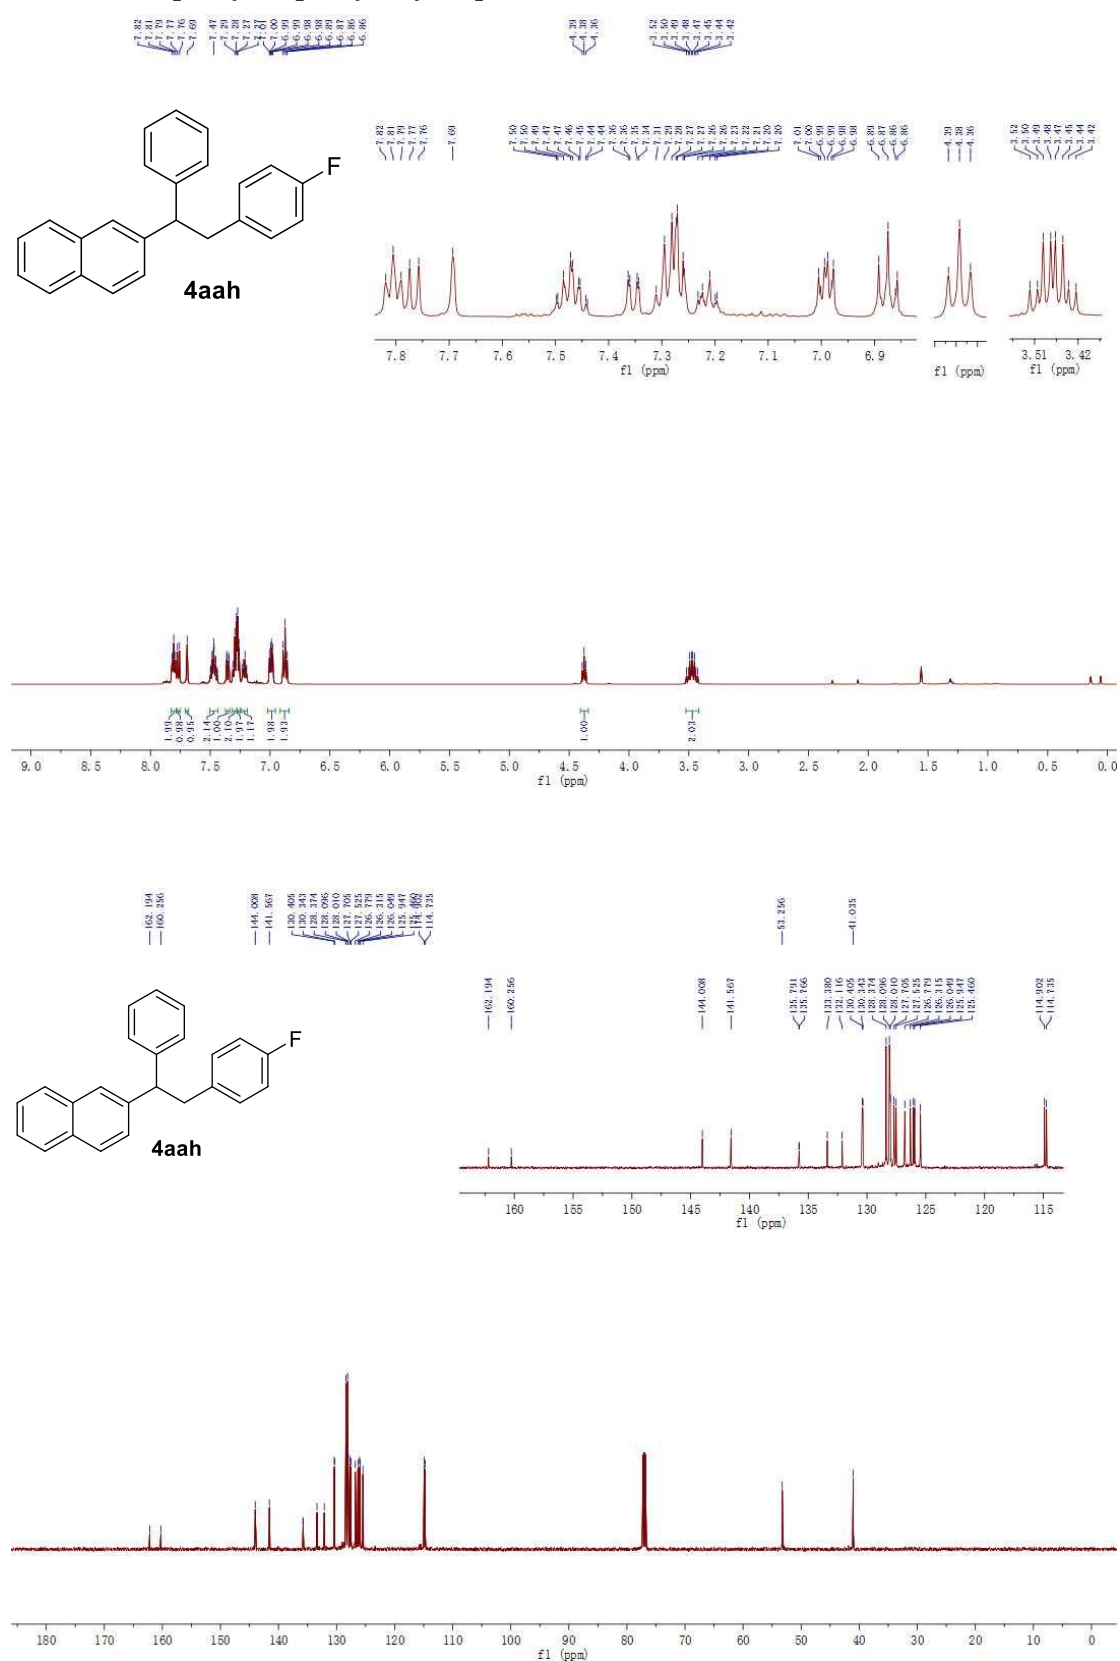



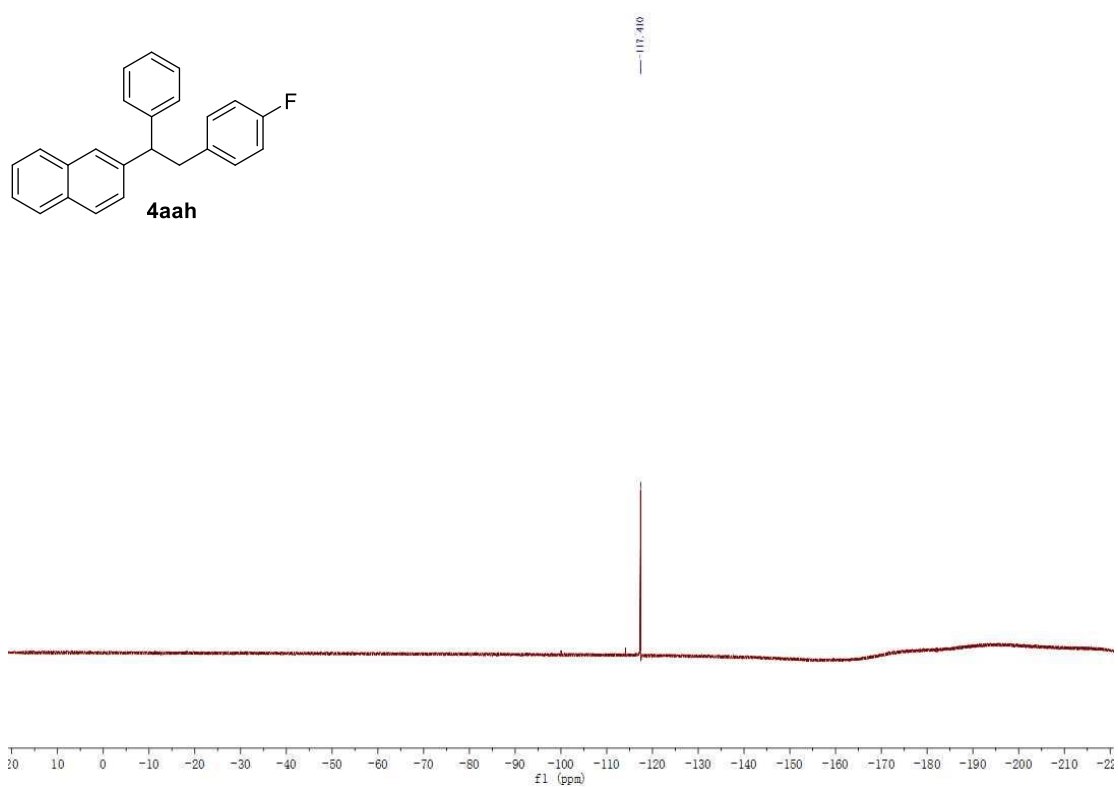



The figure displays the chemical structure of compound 4aai and its corresponding <sup>1</sup>H and <sup>13</sup>C NMR spectra.

**Chemical Structure of 4aai:** FC1=CC=C(C=C1)CC(Cc2ccc(C(F)(F)F)cc2)c3ccc4ccccc4c3

**<sup>1</sup>H NMR Spectrum (CDCl<sub>3</sub>):** The spectrum shows peaks in the aromatic region (6.9–7.8 ppm) and aliphatic region (3.4–4.4 ppm). Integration values are provided below the peaks.

**<sup>13</sup>C NMR Spectrum (CDCl<sub>3</sub>):** The spectrum shows peaks in the aromatic region (114–136 ppm) and aliphatic region (125–135 ppm).



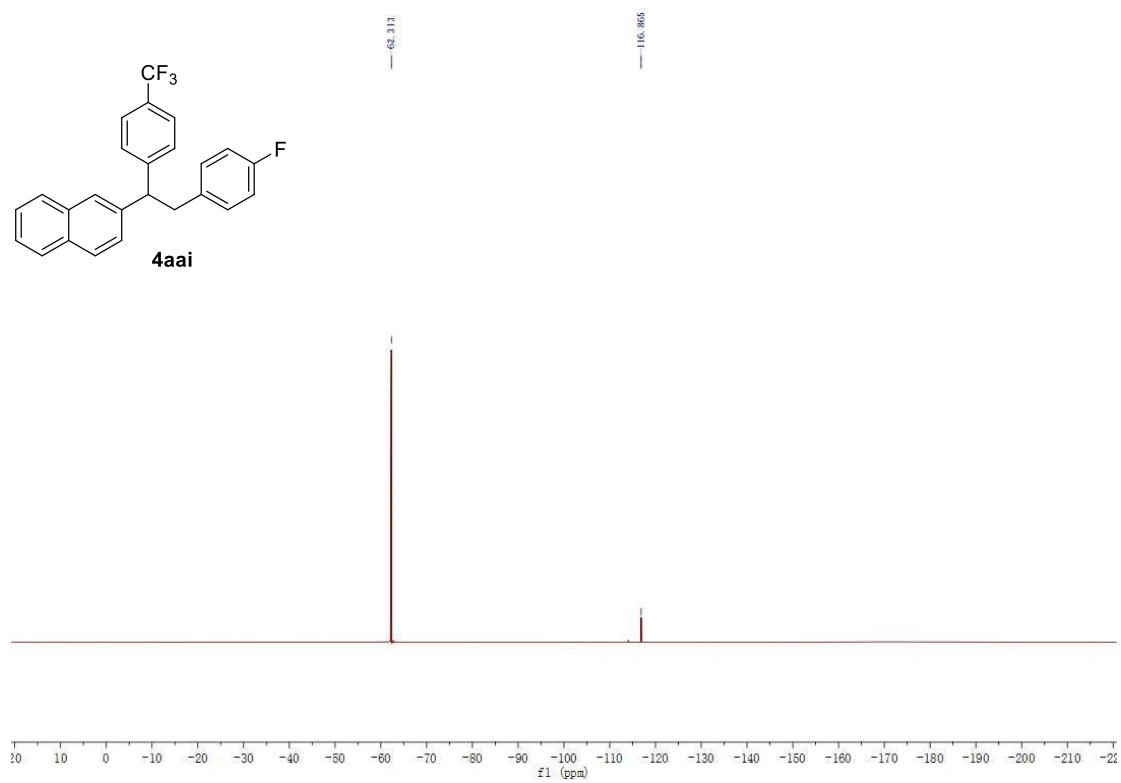



## 2-(1,2-bis(4-fluorophenyl)ethyl)naphthalene (4aaj)

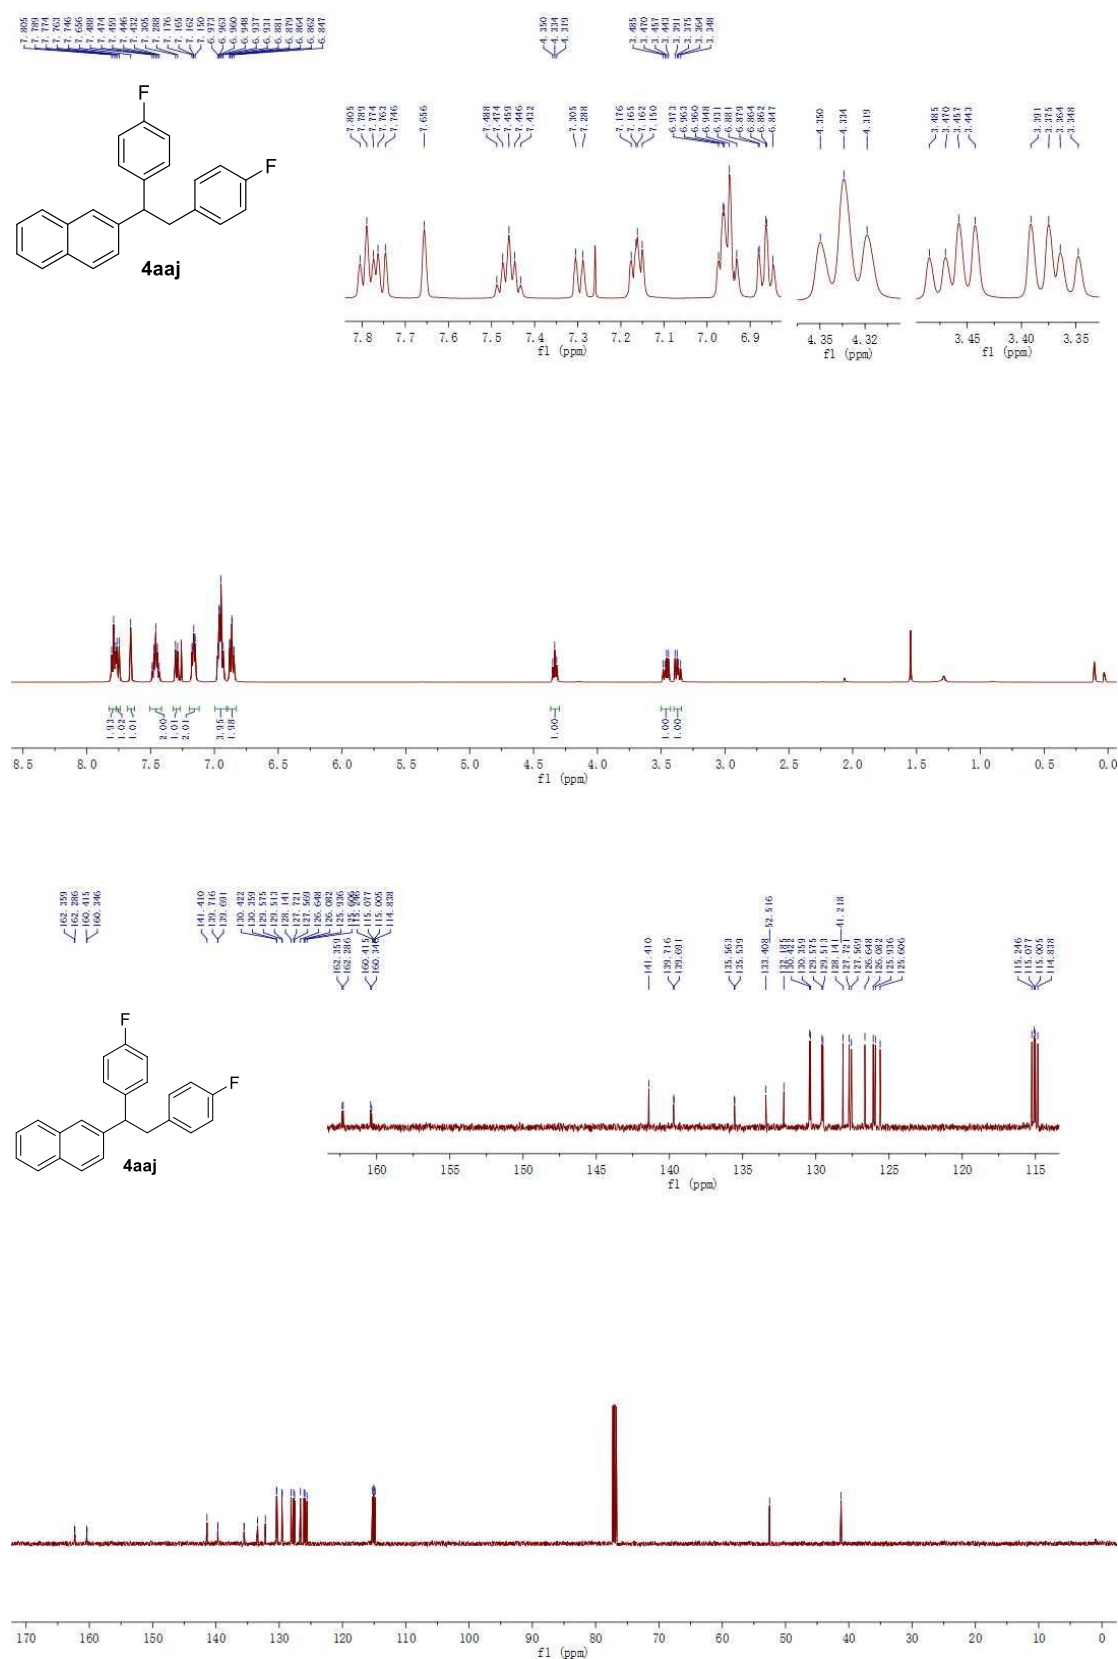



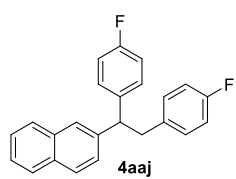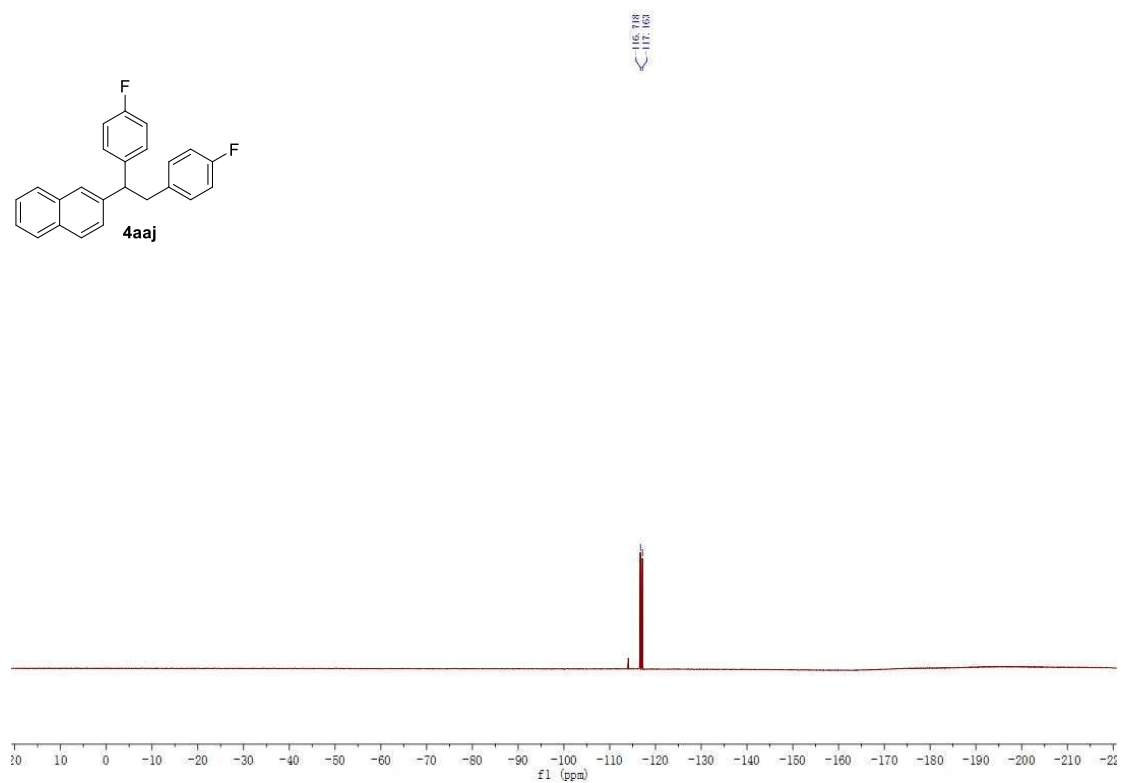



The figure displays the chemical structure of compound 4aak and its corresponding <sup>1</sup>H and <sup>13</sup>C NMR spectra.

**Chemical Structure of 4aak:** CC(C)(C)c1ccc(cc1)C(Cc2ccc(F)cc2)c3ccc4ccccc4c3

**<sup>1</sup>H NMR Spectrum (CDCl<sub>3</sub>):**

- Chemical shift range: 7.8 to 1.3 ppm.
- Integration values: 3.34, 0.98, 2.20, 2.21, 2.28, 2.04, 2.01, 1.03, 1.99, 9.09.
- Peak assignments (ppm): 7.73, 7.72, 7.71, 7.70, 7.69, 7.68, 7.67, 7.66, 7.65, 7.64, 7.63, 7.62, 7.61, 7.60, 7.59, 7.58, 7.57, 7.56, 7.55, 7.54, 7.53, 7.52, 7.51, 7.50, 7.49, 7.48, 7.47, 7.46, 7.45, 7.44, 7.43, 7.42, 7.41, 7.40, 7.39, 7.38, 7.37, 7.36, 7.35, 7.34, 7.33, 7.32, 7.31, 7.30, 7.29, 7.28, 7.27, 7.26, 7.25, 7.24, 7.23, 7.22, 7.21, 7.20, 7.19, 7.18, 7.17, 7.16, 7.15, 7.14, 7.13, 7.12, 7.11, 7.10, 7.09, 7.08, 7.07, 7.06, 7.05, 7.04, 7.03, 7.02, 7.01, 7.00, 6.99, 6.98, 6.97, 6.96, 6.95, 6.94, 6.93, 6.92, 6.91, 6.90, 6.89, 6.88, 6.87, 6.86, 6.85, 6.84, 6.83, 6.82, 6.81, 6.80, 6.79, 6.78, 6.77, 6.76, 6.75, 6.74, 6.73, 6.72, 6.71, 6.70, 6.69, 6.68, 6.67, 6.66, 6.65, 6.64, 6.63, 6.62, 6.61, 6.60, 6.59, 6.58, 6.57, 6.56, 6.55, 6.54, 6.53, 6.52, 6.51, 6.50, 6.49, 6.48, 6.47, 6.46, 6.45, 6.44, 6.43, 6.42, 6.41, 6.40, 6.39, 6.38, 6.37, 6.36, 6.35, 6.34, 6.33, 6.32, 6.31, 6.30, 6.29, 6.28, 6.27, 6.26, 6.25, 6.24, 6.23, 6.22, 6.21, 6.20, 6.19, 6.18, 6.17, 6.16, 6.15, 6.14, 6.13, 6.12, 6.11, 6.10, 6.09, 6.08, 6.07, 6.06, 6.05, 6.04, 6.03, 6.02, 6.01, 6.00, 5.99, 5.98, 5.97, 5.96, 5.95, 5.94, 5.93, 5.92, 5.91, 5.90, 5.89, 5.88, 5.87, 5.86, 5.85, 5.84, 5.83, 5.82, 5.81, 5.80, 5.79, 5.78, 5.77, 5.76, 5.75, 5.74, 5.73, 5.72, 5.71, 5.70, 5.69, 5.68, 5.67, 5.66, 5.65, 5.64, 5.63, 5.62, 5.61, 5.60, 5.59, 5.58, 5.57, 5.56, 5.55, 5.54, 5.53, 5.52, 5.51, 5.50, 5.49, 5.48, 5.47, 5.46, 5.45, 5.44, 5.43, 5.42, 5.41, 5.40, 5.39, 5.38, 5.37, 5.36, 5.35, 5.34, 5.33, 5.32, 5.31, 5.30, 5.29, 5.28, 5.27, 5.26, 5.25, 5.24, 5.23, 5.22, 5.21, 5.20, 5.19, 5.18, 5.17, 5.16, 5.15, 5.14, 5.13, 5.12, 5.11, 5.10, 5.09, 5.08, 5.07, 5.06, 5.05, 5.04, 5.03, 5.02, 5.01, 5.00, 4.99, 4.98, 4.97, 4.96, 4.95, 4.94, 4.93, 4.92, 4.91, 4.90, 4.89, 4.88, 4.87, 4.86, 4.85, 4.84, 4.83, 4.82, 4.81, 4.80, 4.79, 4.78, 4.77, 4.76, 4.75, 4.74, 4.73, 4.72, 4.71, 4.70, 4.69, 4.68, 4.67, 4.66, 4.65, 4.64, 4.63, 4.62, 4.61, 4.60, 4.59, 4.58, 4.57, 4.56, 4.55, 4.54, 4.53, 4.52, 4.51, 4.50, 4.49, 4.48, 4.47, 4.46, 4.45, 4.44, 4.43, 4.42, 4.41, 4.40, 4.39, 4.38, 4.37, 4.36, 4.35, 4.34, 4.33, 4.32, 4.31, 4.30, 4.29, 4.28, 4.27, 4.26, 4.25, 4.24, 4.23, 4.22, 4.21, 4.20, 4.19, 4.18, 4.17, 4.16, 4.15, 4.14, 4.13, 4.12, 4.11, 4.10, 4.09, 4.08, 4.07, 4.06, 4.05, 4.04, 4.03, 4.02, 4.01, 4.00, 3.99, 3.98, 3.97, 3.96, 3.95, 3.94, 3.93, 3.92, 3.91, 3.90, 3.89, 3.88, 3.87, 3.86, 3.85, 3.84, 3.83, 3.82, 3.81, 3.80, 3.79, 3.78, 3.77, 3.76, 3.75, 3.74, 3.73, 3.72, 3.71, 3.70, 3.69, 3.68, 3.67, 3.66, 3.65, 3.64, 3.63, 3.62, 3.61, 3.60, 3.59, 3.58, 3.57, 3.56, 3.55, 3.54, 3.53, 3.52, 3.51, 3.50, 3.49, 3.48, 3.47, 3.46, 3.45, 3.44, 3.43, 3.42, 3.41, 3.40, 3.39, 3.38, 3.37, 3.36, 3.35, 3.34, 3.33, 3.32, 3.31, 3.30, 3.29, 3.28, 3.27, 3.26, 3.25, 3.24, 3.23, 3.22, 3.21, 3.20, 3.19, 3.18, 3.17, 3.16, 3.15, 3.14, 3.13, 3.12, 3.11, 3.10, 3.09, 3.08, 3.07, 3.06, 3.05, 3.04, 3.03, 3.02, 3.01, 3.00, 2.99, 2.98, 2.97, 2.96, 2.95, 2.94, 2.93, 2.92, 2.91, 2.90, 2.89, 2.88, 2.87, 2.86, 2.85, 2.84, 2.83, 2.82, 2.81, 2.80, 2.79, 2.78, 2.77, 2.76, 2.75, 2.74, 2.73, 2.72, 2.71, 2.70, 2.69, 2.68, 2.67, 2.66, 2.65, 2.64, 2.63, 2.62, 2.61, 2.60, 2.59, 2.58, 2.57, 2.56, 2.55, 2.54, 2.53, 2.52, 2.51, 2.50, 2.49, 2.48, 2.47, 2.46, 2.45, 2.44, 2.43, 2.42, 2.41, 2.40, 2.39, 2.38, 2.37, 2.36, 2.35, 2.34, 2.33, 2.32, 2.31, 2.30, 2.29, 2.28, 2.27, 2.26, 2.25, 2.24, 2.23, 2.22, 2.21, 2.20, 2.19, 2.18, 2.17, 2.16, 2.15, 2.14, 2.13, 2.12, 2.11, 2.10, 2.09, 2.08, 2.07, 2.06, 2.05, 2.04, 2.03, 2.02, 2.01, 2.00, 1.99, 1.98, 1.97, 1.96, 1.95, 1.94, 1.93, 1.92, 1.91, 1.90, 1.89, 1.88, 1.87, 1.86, 1.85, 1.84, 1.83, 1.82, 1.81, 1.80, 1.79, 1.78, 1.77, 1.76, 1.75, 1.74, 1.73, 1.72, 1.71, 1.70, 1.69, 1.68, 1.67, 1.66, 1.65, 1.64, 1.63, 1.62, 1.61, 1.60, 1.59, 1.58, 1.57, 1.56, 1.55, 1.54, 1.53, 1.52, 1.51, 1.50, 1.49, 1.48, 1.47, 1.46, 1.45, 1.44, 1.43, 1.42, 1.41, 1.40, 1.39, 1.38, 1.37, 1.36, 1.35, 1.34, 1.33, 1.32, 1.31, 1.



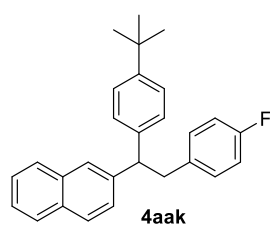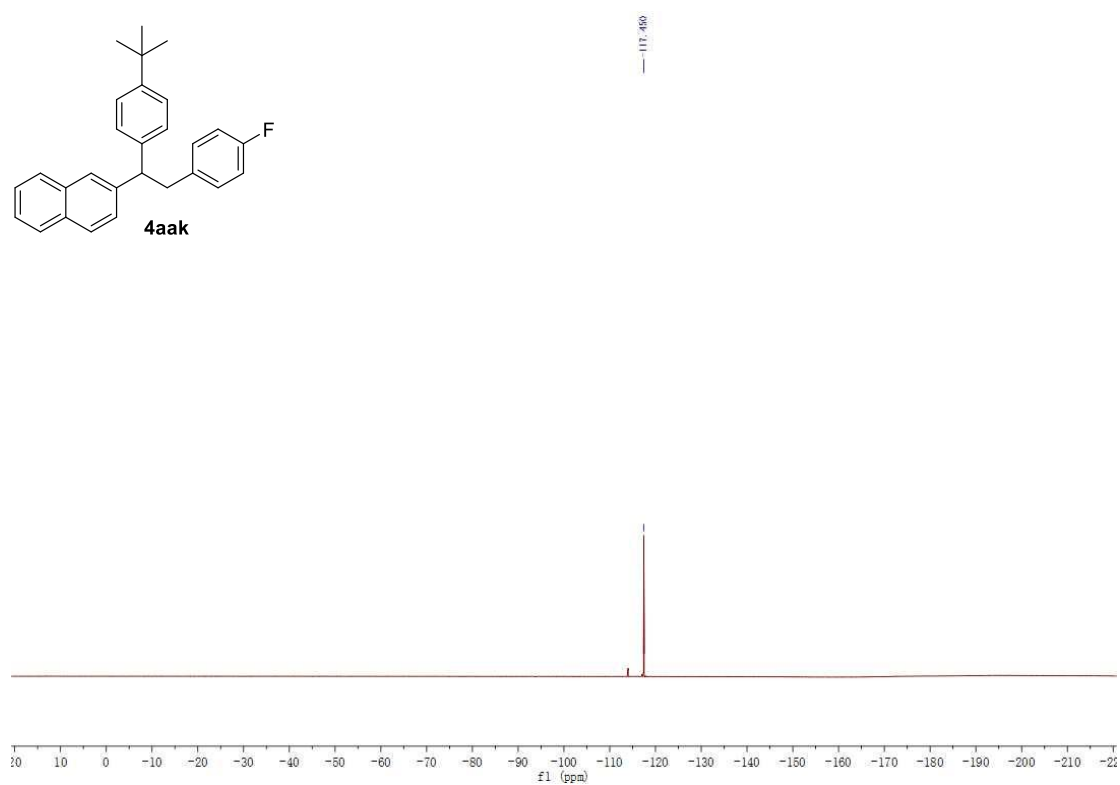



ethyl 4-(2-(4-fluorophenyl)-1-(naphthalen-2-yl)ethyl)benzoate (4aai)

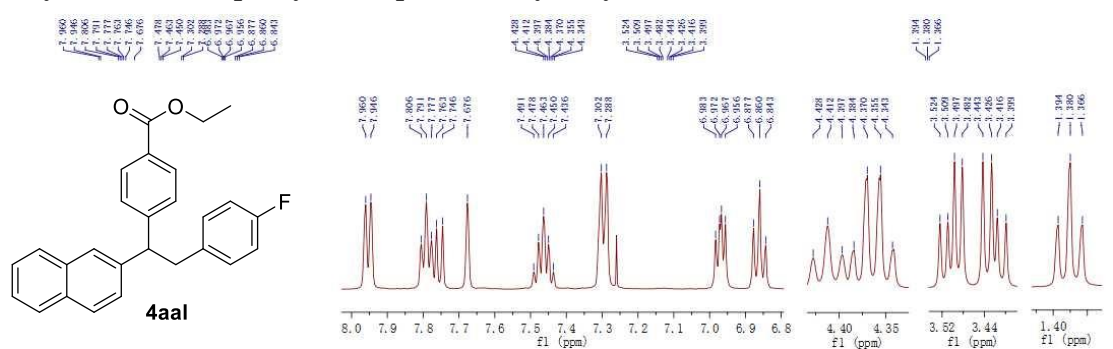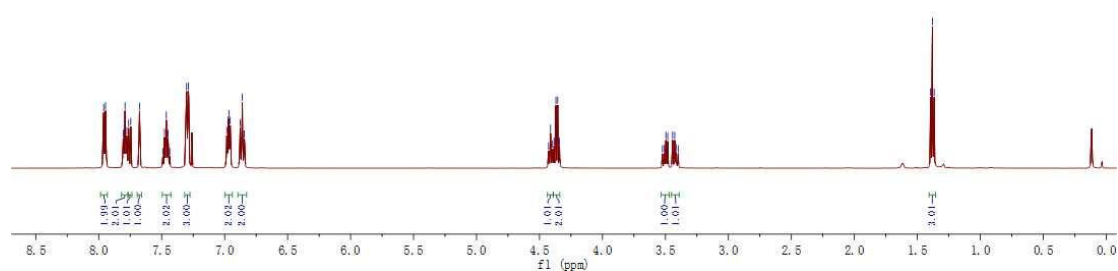



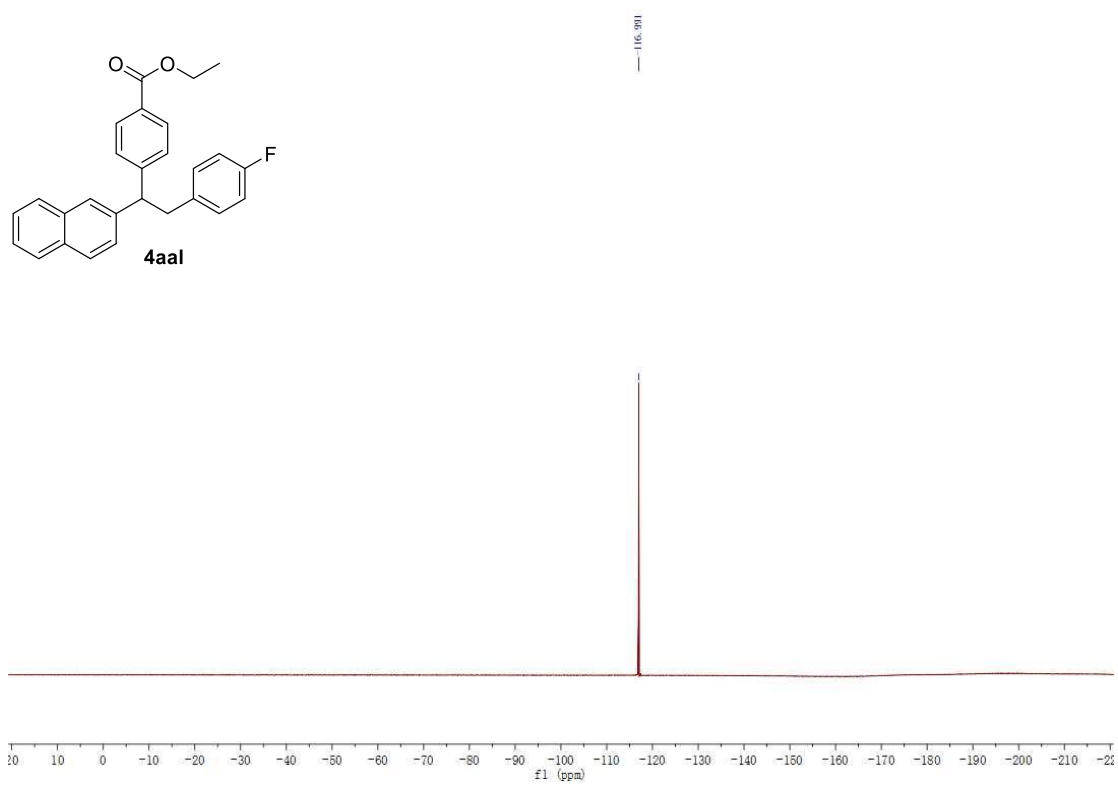



**2,2'-(2-(*p*-tolyl)ethane-1,1-diyl)dinaphthalene(4abm)**

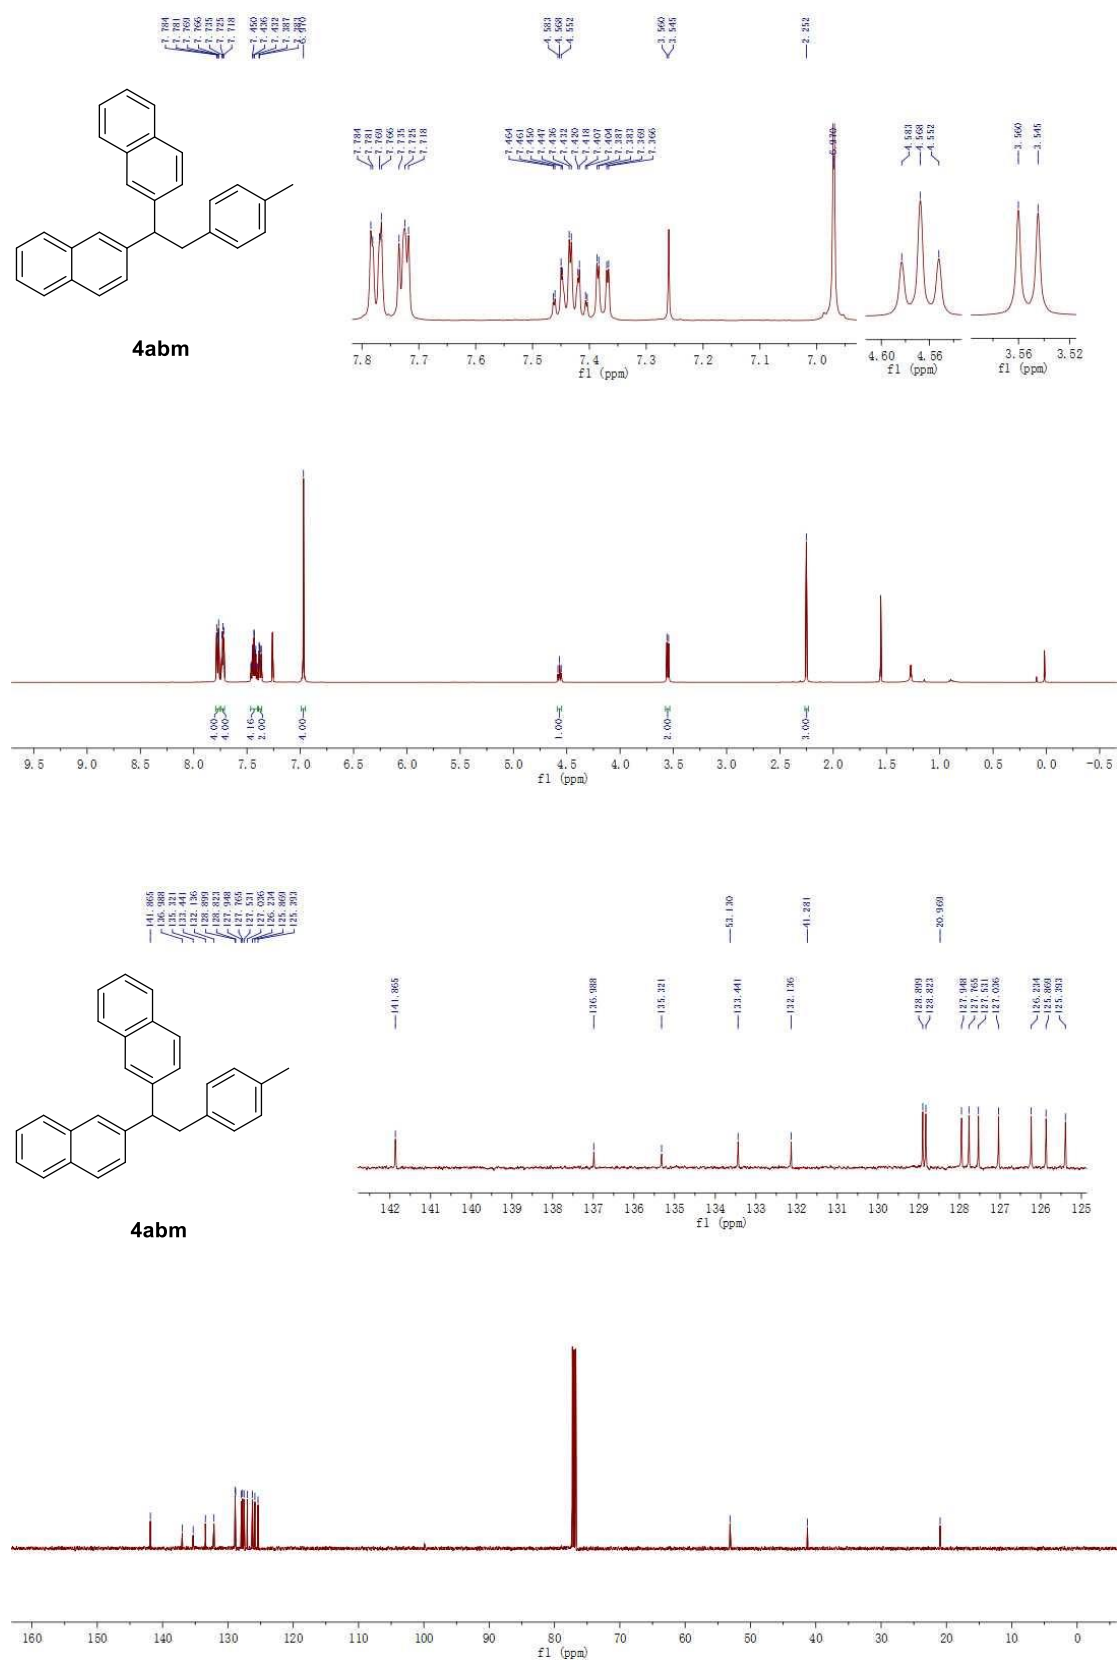



**(E)-2-(4-phenyl-1-(p-tolyl)but-3-en-2-yl)naphthalene(4abn)**

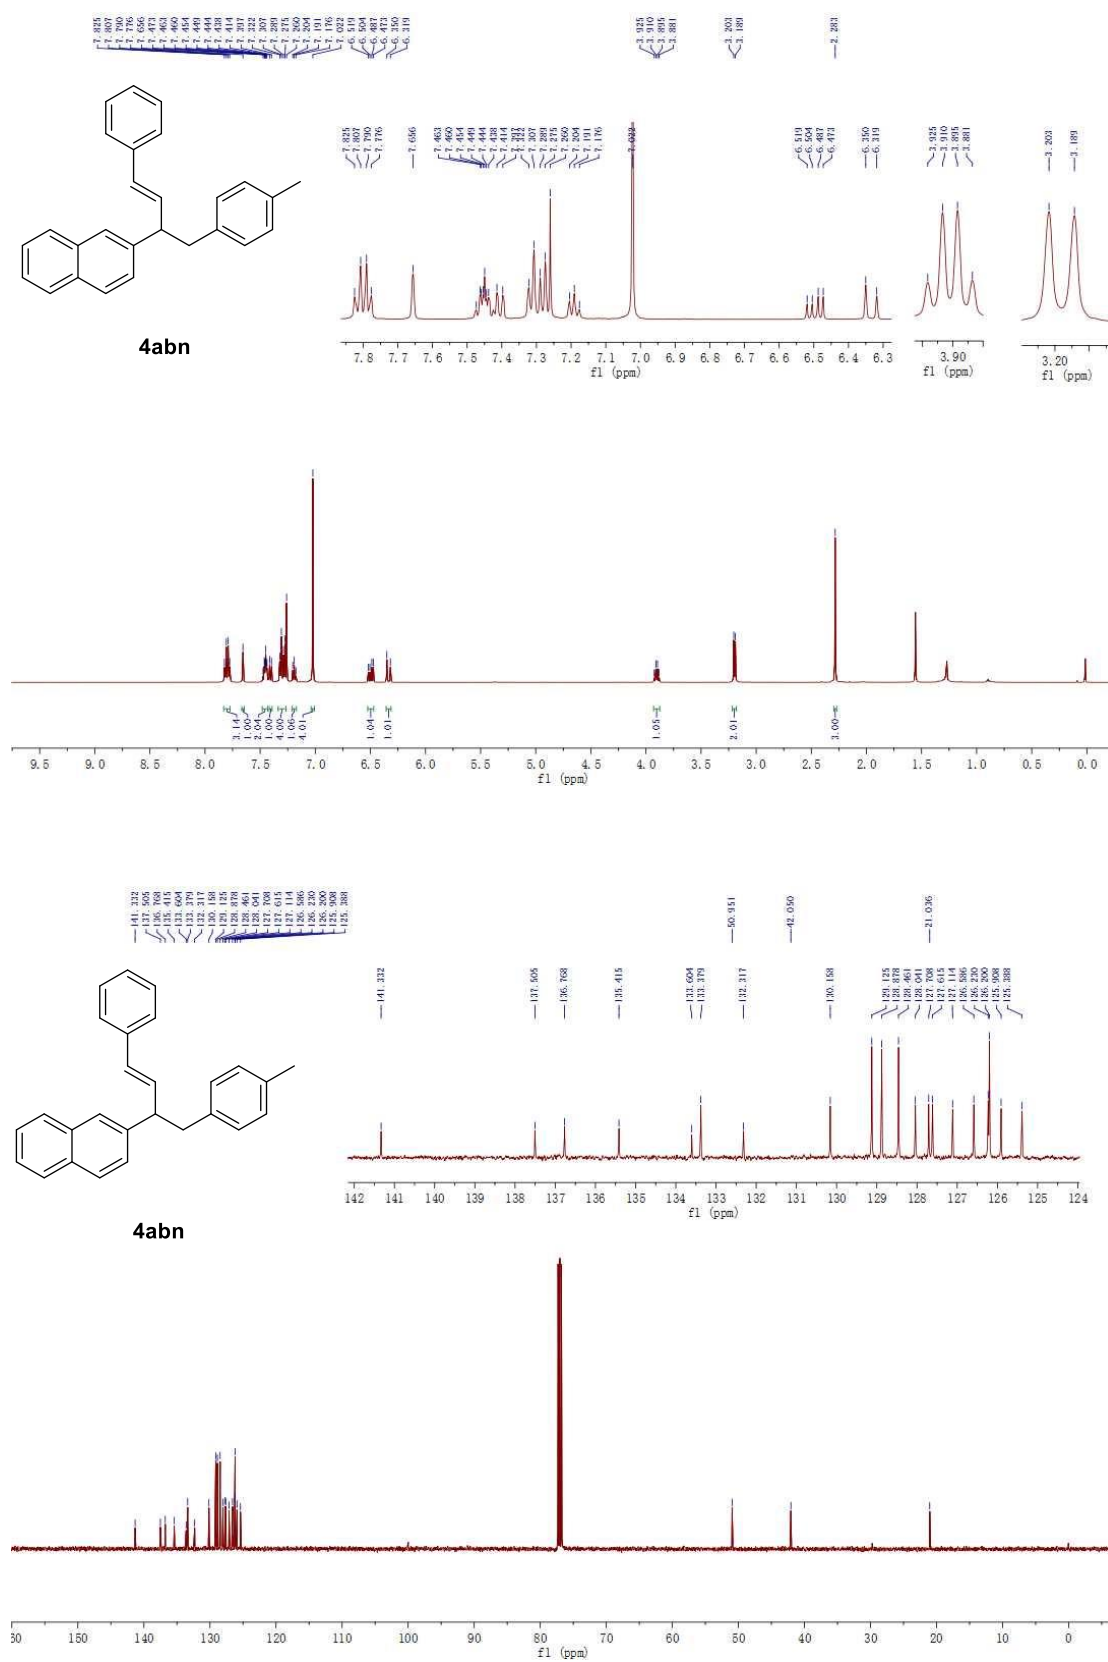



**4abo**

<sup>1</sup>H NMR spectrum (CDCl<sub>3</sub>) of compound **4abo**. The spectrum shows peaks in the aromatic region (7.1–7.9 ppm) and aliphatic region (3.6–4.0 ppm). Integration values are provided above the peaks.

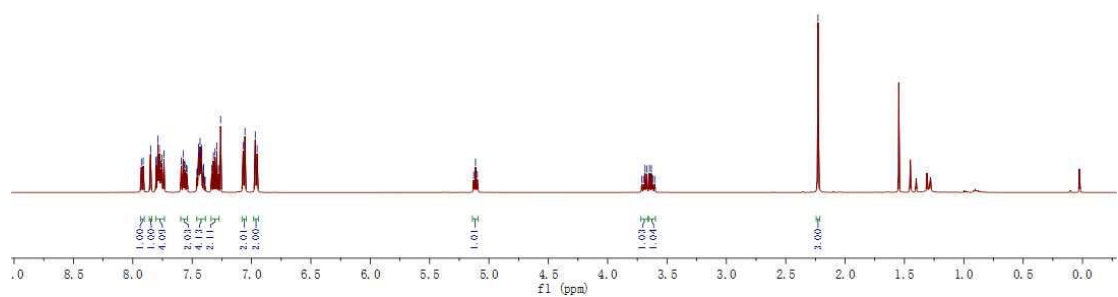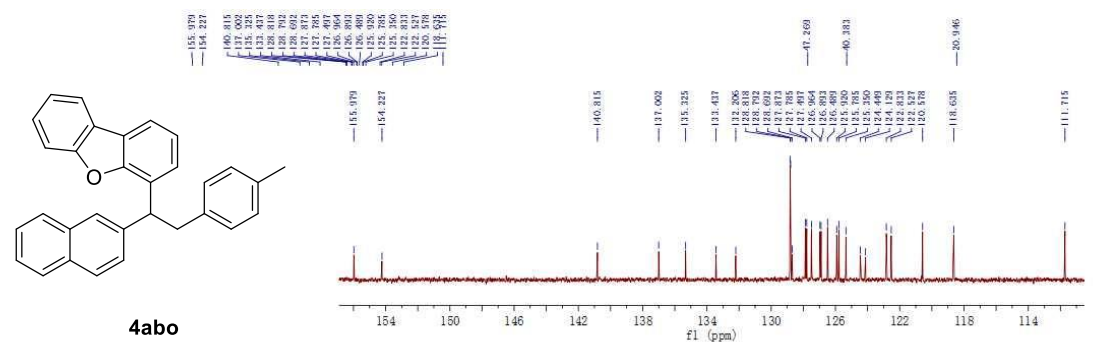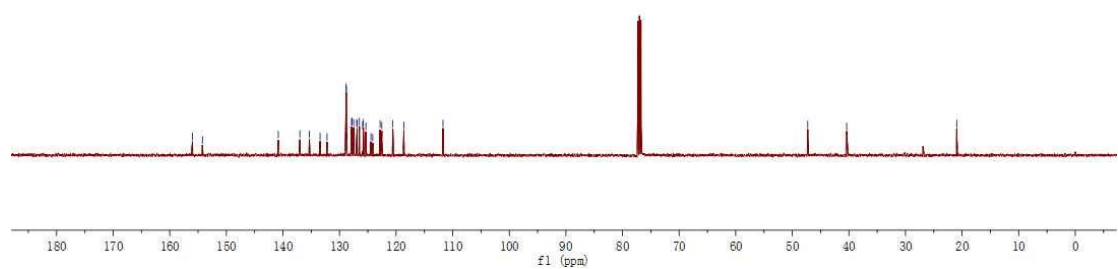



## 2-(2-(3-bromophenyl)-1-(*p*-tolyl)ethyl)naphthalene (4aca)

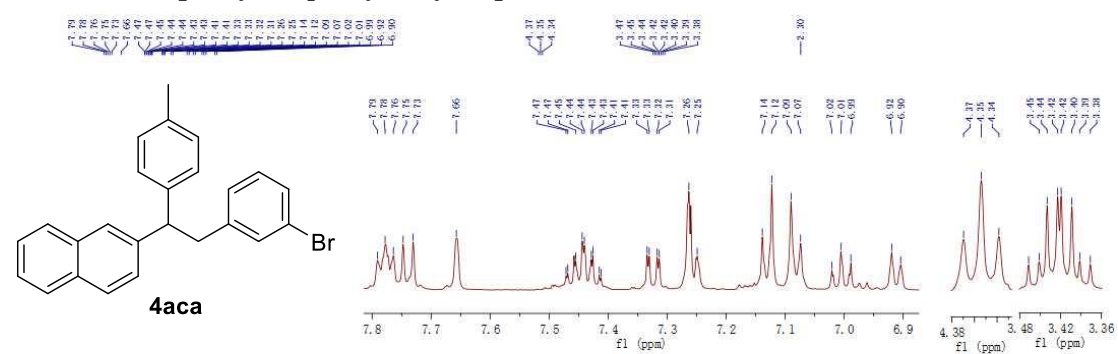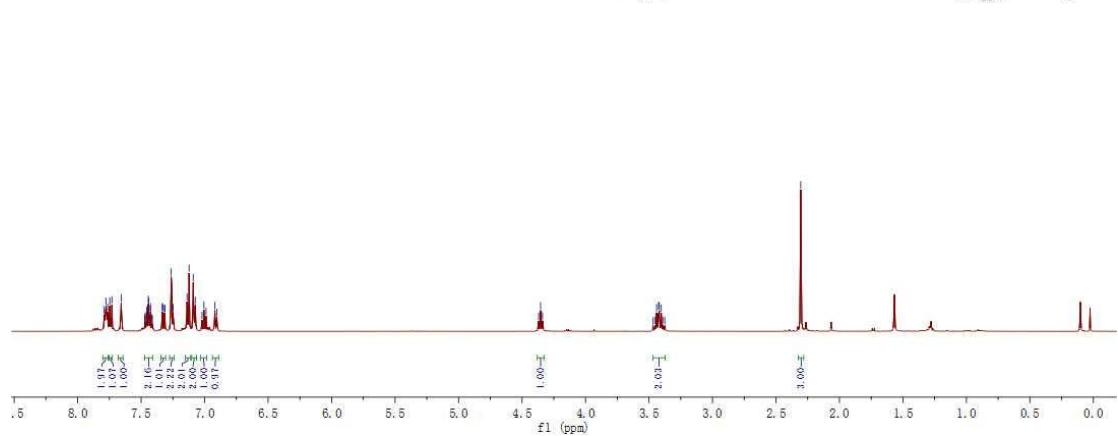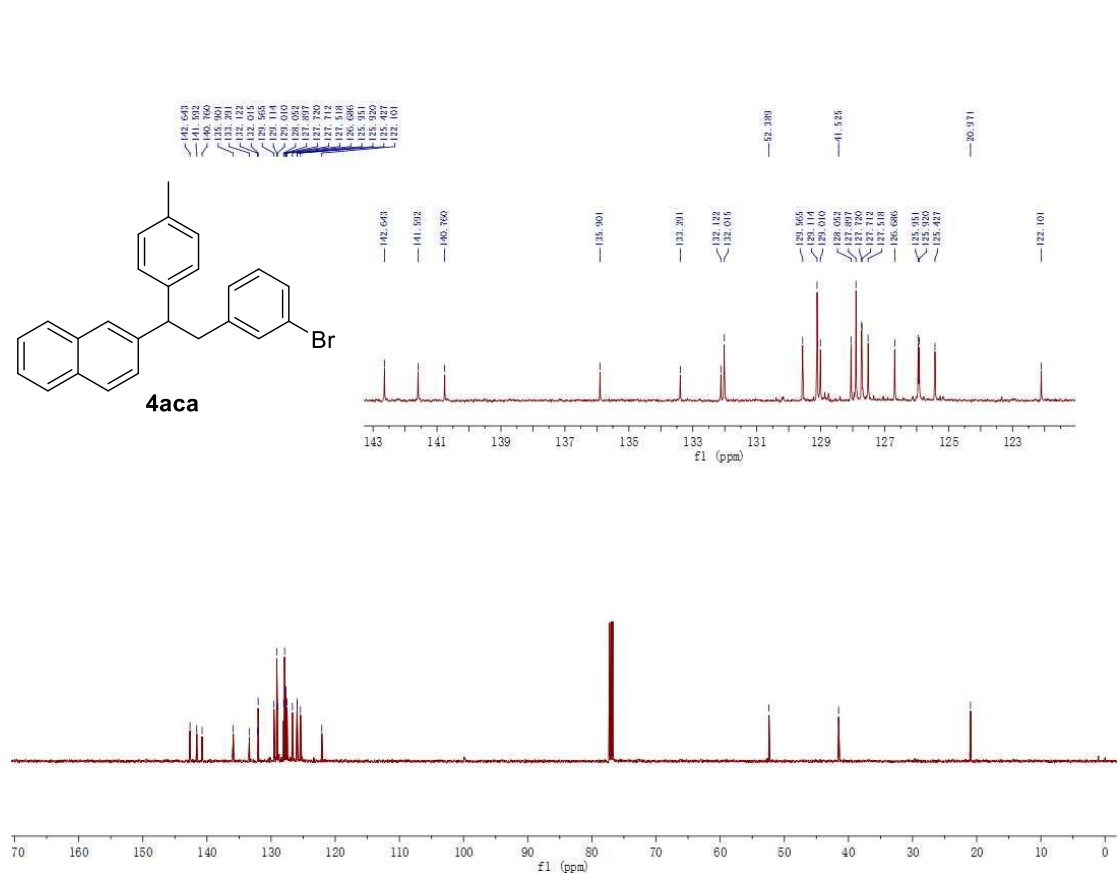



## 2-(2-(2-fluorophenyl)-1-(*p*-tolyl)ethyl)naphthalene (4ada)

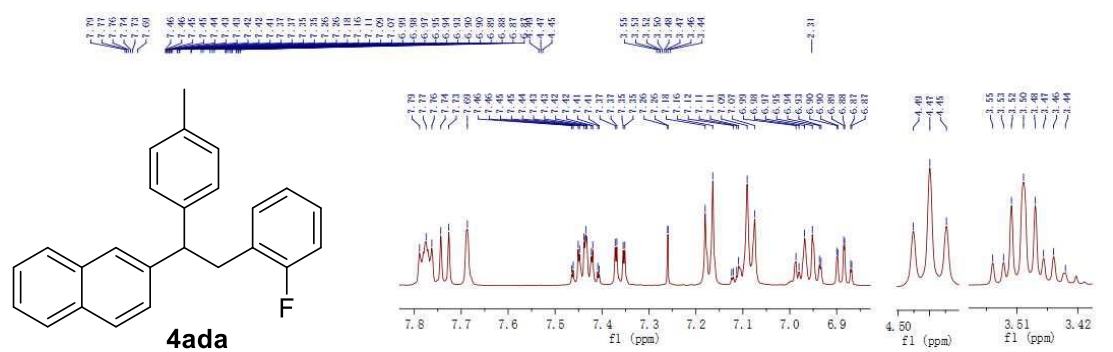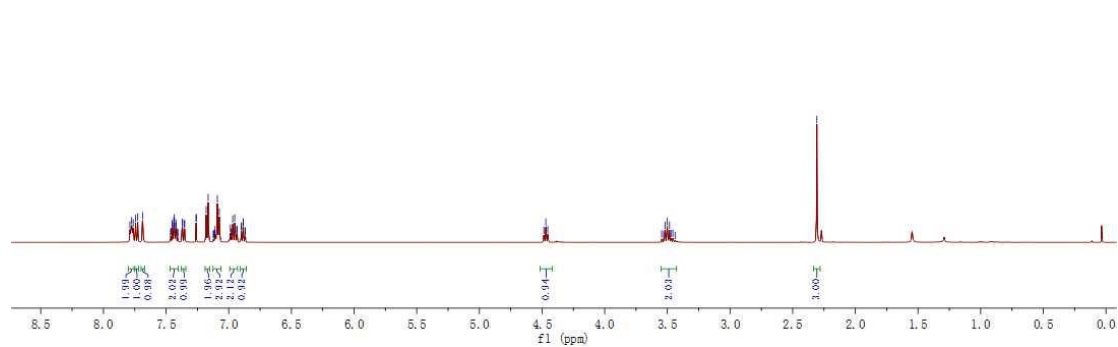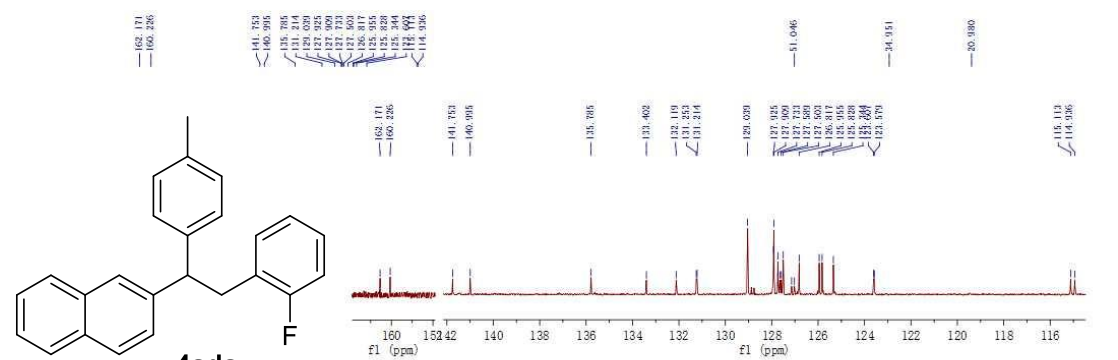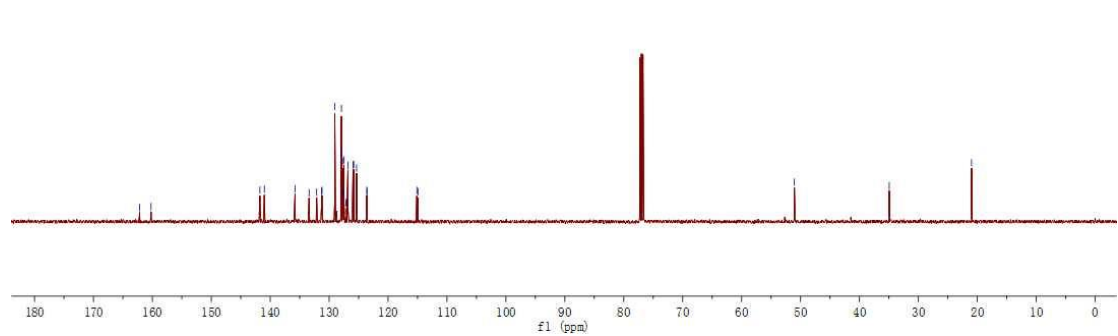



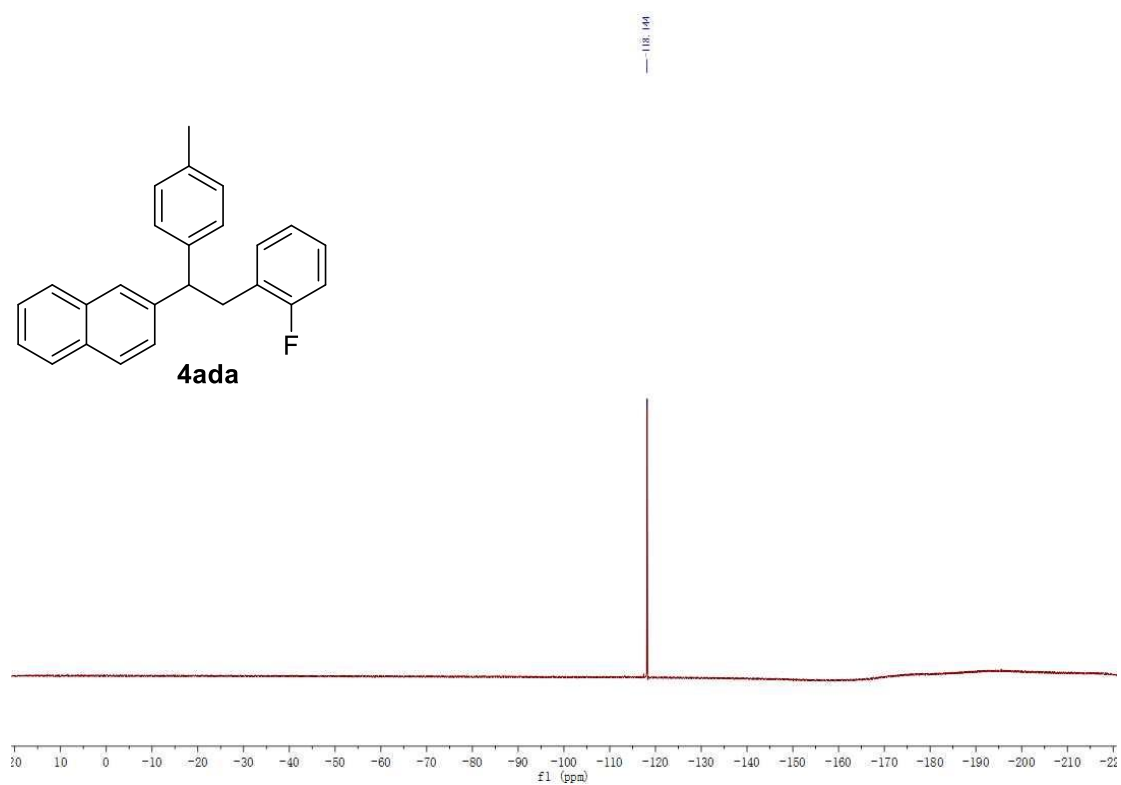



**4aea**

<sup>1</sup>H NMR (400 MHz, CDCl<sub>3</sub>) spectrum showing peaks from 7.8 to 3.4 ppm. Integration values are provided below the peaks.

<sup>13</sup>C NMR (100 MHz, CDCl<sub>3</sub>) spectrum showing peaks from 163 to 112 ppm.



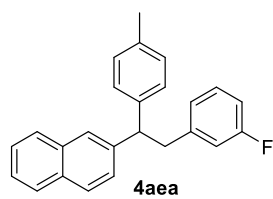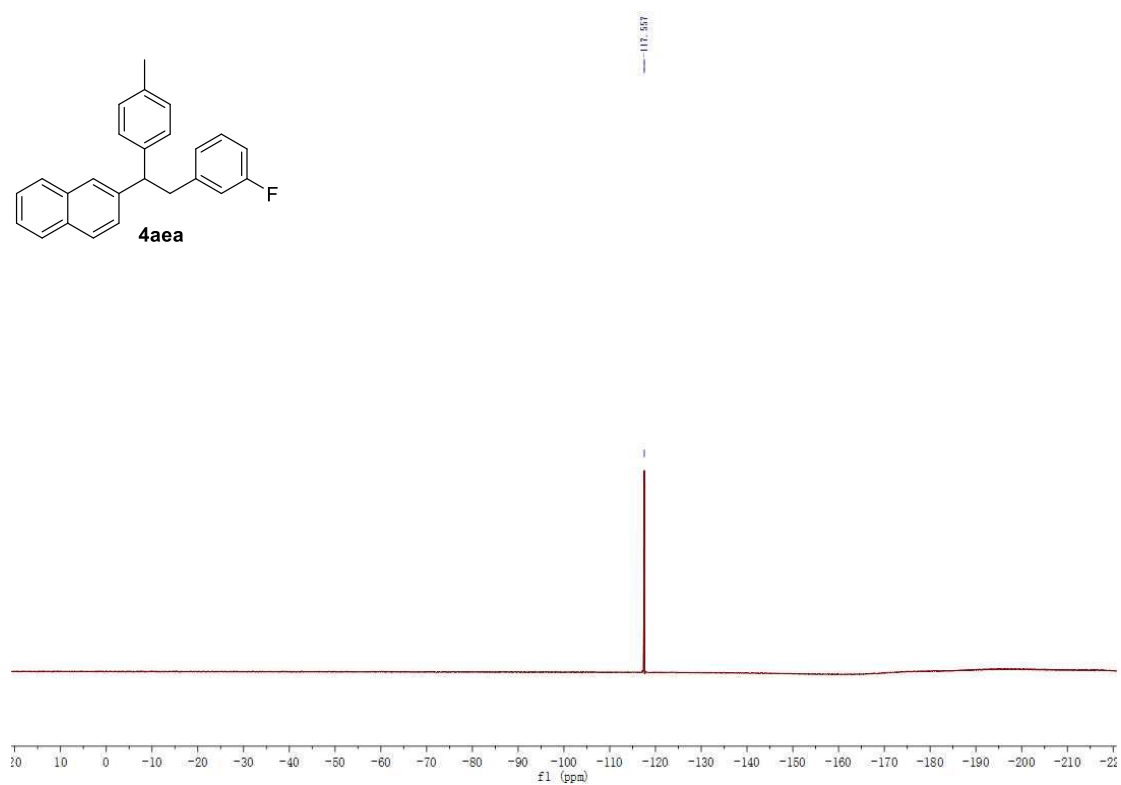



## 2-(2-(4-chlorophenyl)-1-(*p*-tolylethyl)naphthalene (4afa)

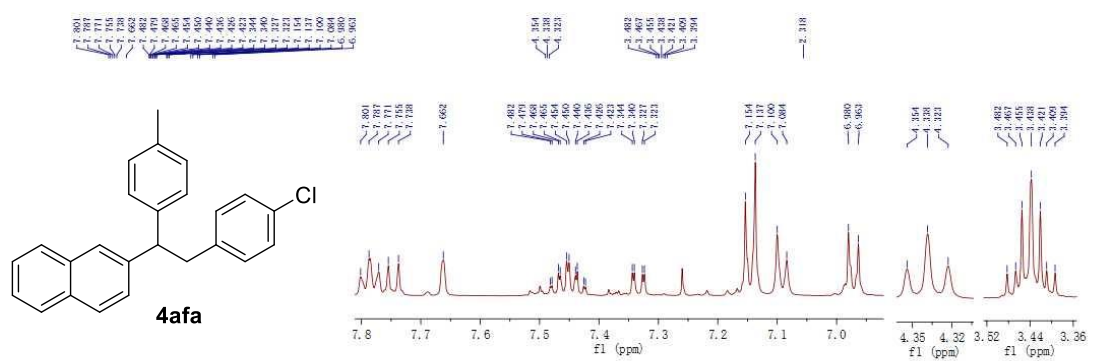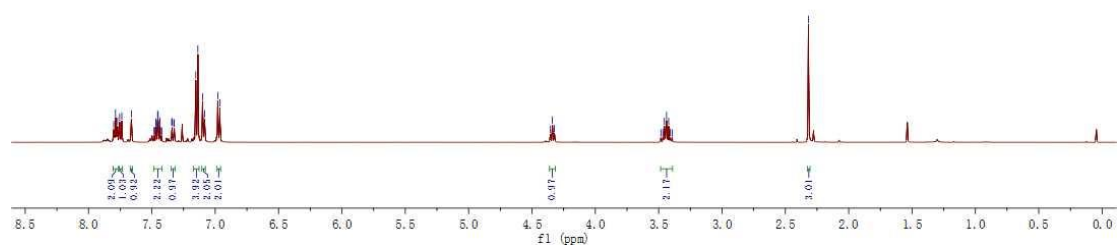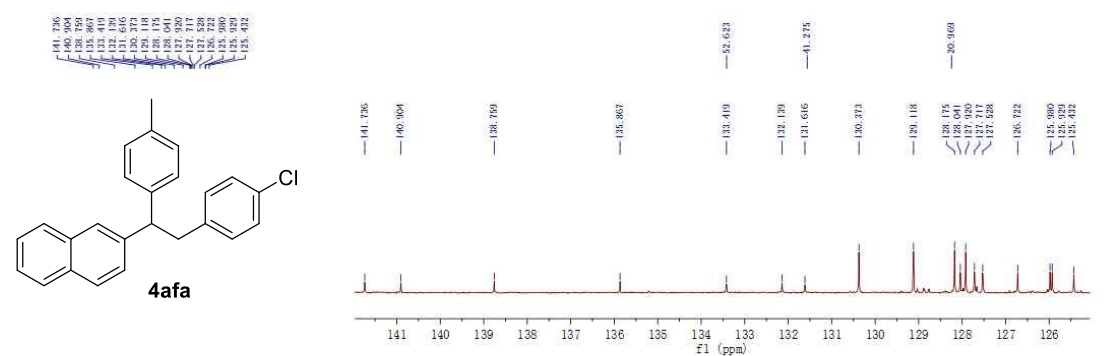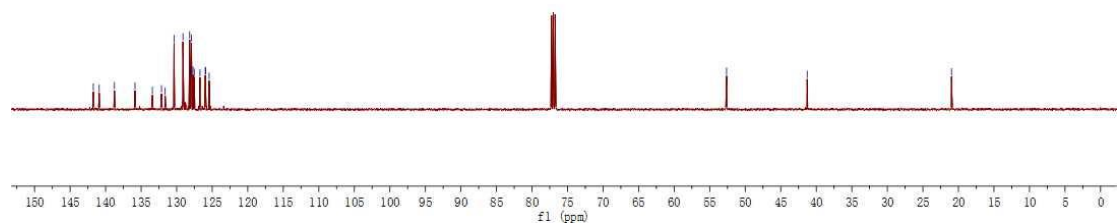



**2-(2-(o-tolyl)-1-(p-tolyl)ethyl)naphthalene (4aga)**

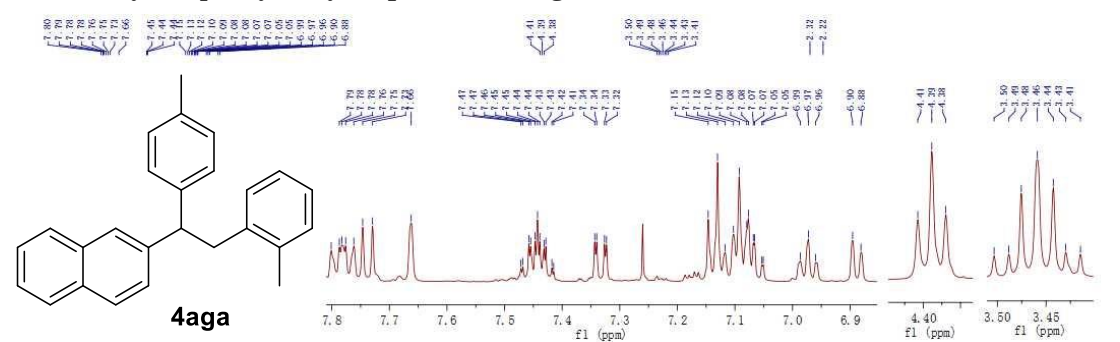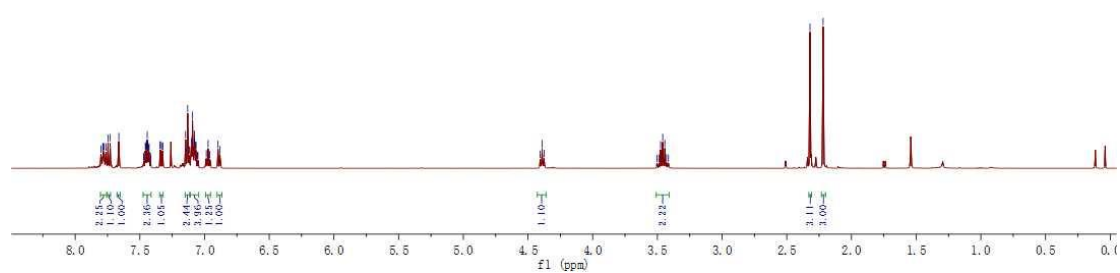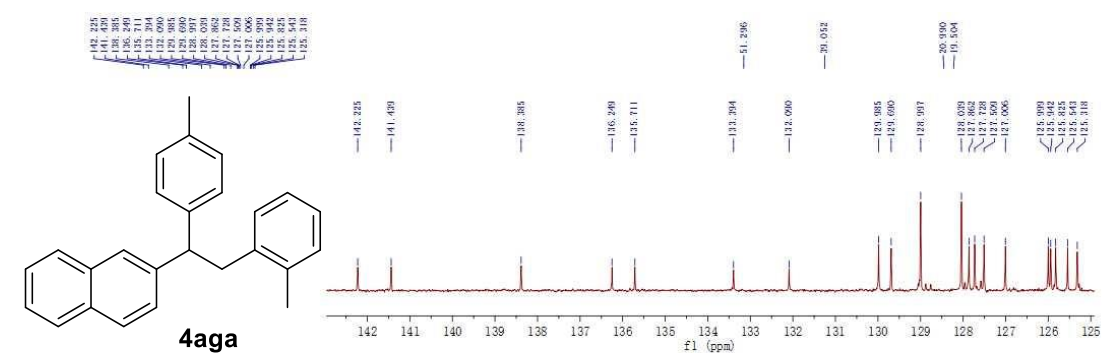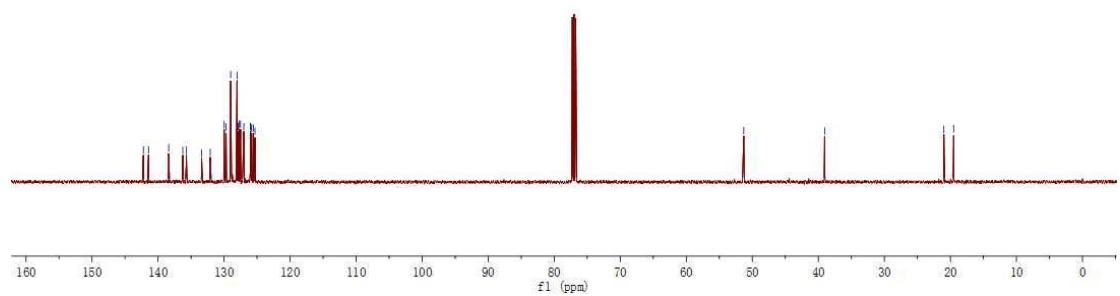



Chemical structure of **4a** (1-(4-ethylphenyl)-2-(naphthalen-1-yl)ethane) is shown. The  $^1\text{H}$  NMR spectrum (CDCl<sub>3</sub>) displays peaks in the aromatic region (7.0–7.8 ppm) and aliphatic region (1.0–2.5 ppm). The spectrum includes integration values for each peak group.

**Chemical Structure:** CCc1ccc(cc1)CC(c2ccccc2c3ccccc3)c4ccccc4

**$^1\text{H}$  NMR Spectrum (CDCl<sub>3</sub>):**

- Aromatic Region (7.0–7.8 ppm):**
  - 7.78 (d, 1H, integration 1.00)
  - 7.75 (d, 1H, integration 1.00)
  - 7.72 (d, 1H, integration 1.00)
  - 7.68 (d, 1H, integration 1.00)
  - 7.65 (d, 1H, integration 1.00)
  - 7.45 (m, 1H, integration 1.00)
  - 7.42 (m, 1H, integration 1.00)
  - 7.40 (m, 1H, integration 1.00)
  - 7.38 (m, 1H, integration 1.00)
  - 7.35 (m, 1H, integration 1.00)
  - 7.28 (m, 1H, integration 1.00)
  - 7.25 (m, 1H, integration 1.00)
  - 7.18 (m, 1H, integration 1.00)
  - 7.10 (m, 1H, integration 1.00)
  - 7.08 (m, 1H, integration 1.00)
  - 7.03 (m, 1H, integration 1.00)
  - 7.01 (m, 1H, integration 1.00)
  - 7.00 (m, 1H, integration 1.00)
  - 6.99 (m, 1H, integration 1.00)
- Aliphatic Region (1.0–2.5 ppm):**
  - 2.48 (m, 2H, integration 2.00)
  - 2.42 (m, 2H, integration 2.00)
  - 2.38 (m, 2H, integration 2.00)
  - 2.35 (m, 2H, integration 2.00)
  - 2.32 (m, 2H, integration 2.00)
  - 2.28 (m, 2H, integration 2.00)
  - 2.25 (m, 2H, integration 2.00)
  - 2.22 (m, 2H, integration 2.00)
  - 2.18 (m, 2H, integration 2.00)
  - 2.15 (m, 2H, integration 2.00)
  - 2.12 (m, 2H, integration 2.00)
  - 2.08 (m, 2H, integration 2.00)
  - 2.03 (m, 2H, integration 2.00)
  - 2.01 (m, 2H, integration 2.00)
  - 2.00 (m, 2H, integration 2.00)
  - 1.99 (m, 2H, integration 2.00)

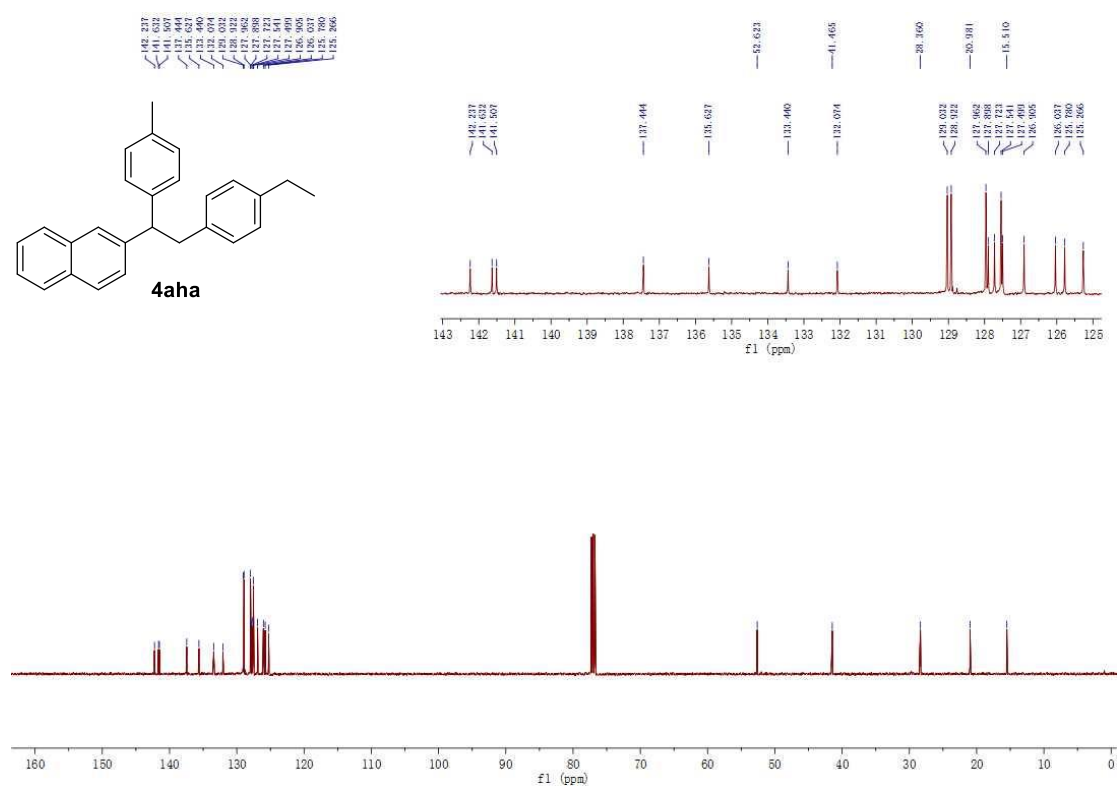



Chemical structure of **4aia** is shown. The <sup>1</sup>H NMR spectrum (CDCl<sub>3</sub>) displays peaks from 7.8 to 1.2 ppm. The integration values are: 7.8 (1.79), 7.7 (1.07), 7.6 (1.07), 7.5 (1.07), 7.4 (1.07), 7.3 (1.07), 7.2 (1.07), 7.1 (1.07), 7.0 (1.07), 4.0 (1.07), 3.48 (1.07), 2.85 (1.07), 2.80 (1.07), 1.20 (1.07).

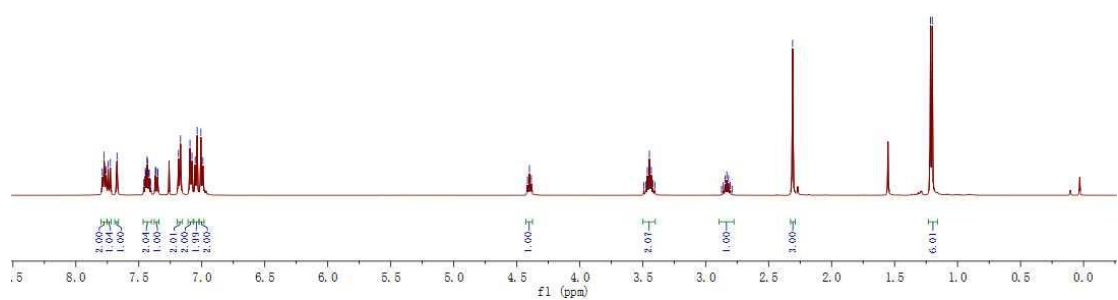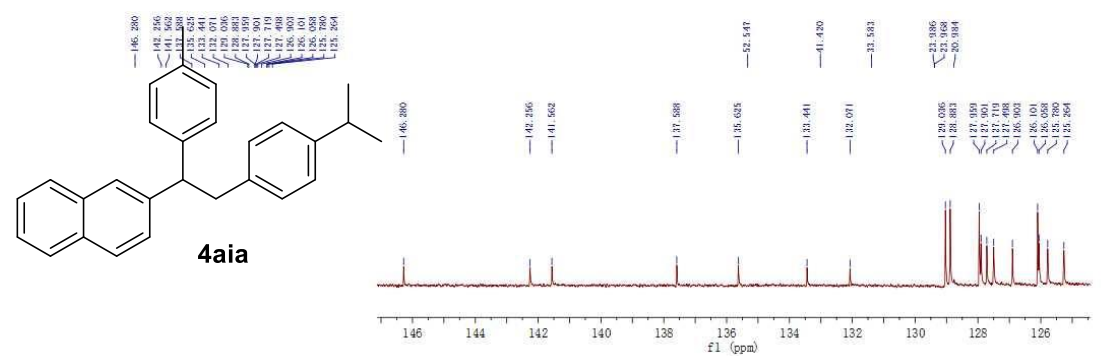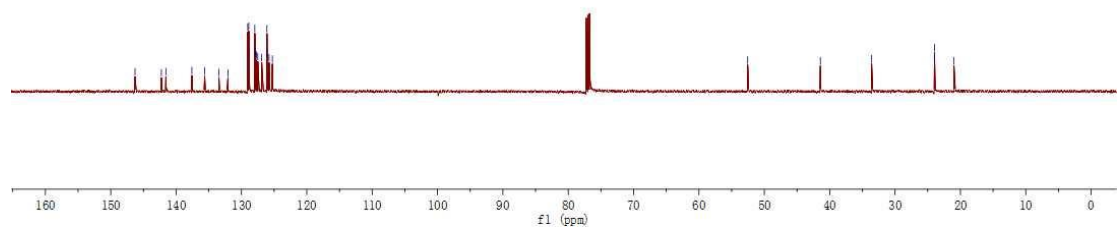



**2-(2-(4-(*tert*-butyl)phenyl)-1-(*p*-tolyl)ethyl)naphthalene (4aja)**

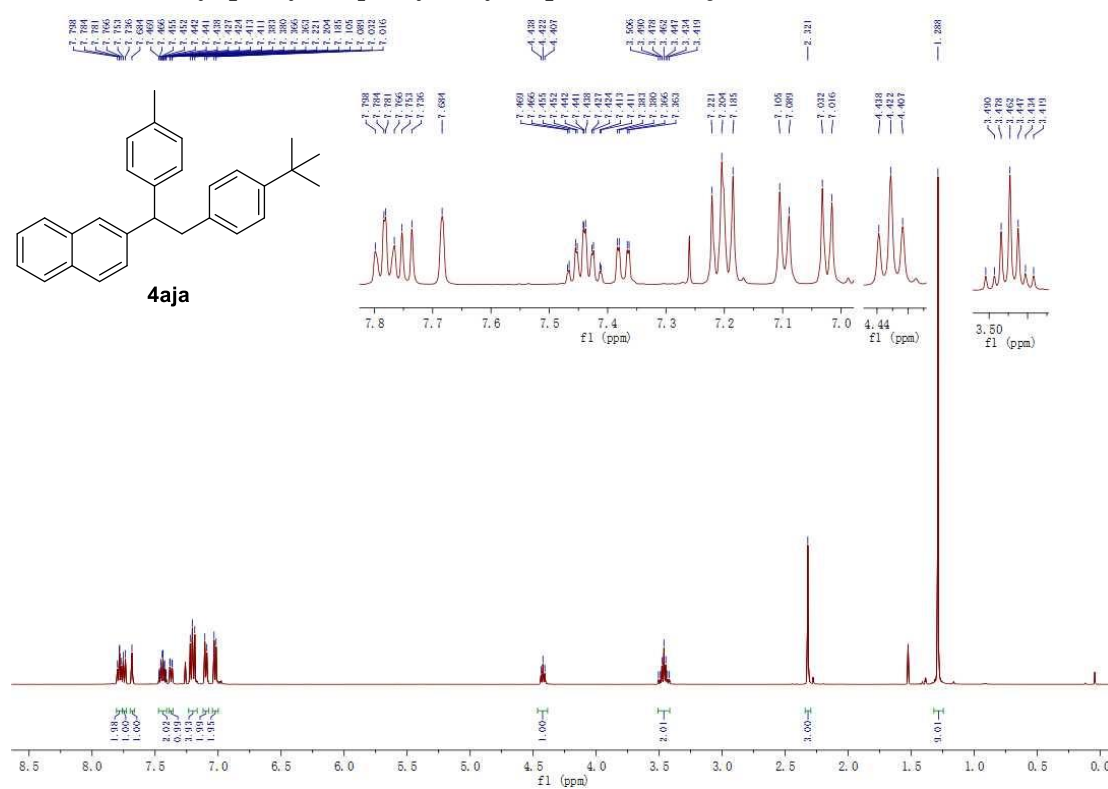



Chemical structure of 4aka: Cc1ccc(cc1)C(Cc2ccccc2)c3ccccc3

<sup>1</sup>H NMR spectrum (ppm):

- 7.80 (d, 2H)
- 7.78 (d, 2H)
- 7.76 (d, 2H)
- 7.74 (d, 2H)
- 7.72 (d, 2H)
- 7.70 (d, 2H)
- 7.68 (d, 2H)
- 7.66 (d, 2H)
- 7.64 (d, 2H)
- 7.62 (d, 2H)
- 7.60 (d, 2H)
- 7.58 (d, 2H)
- 7.56 (d, 2H)
- 7.54 (d, 2H)
- 7.52 (d, 2H)
- 7.50 (d, 2H)
- 7.48 (d, 2H)
- 7.46 (d, 2H)
- 7.44 (d, 2H)
- 7.42 (d, 2H)
- 7.40 (d, 2H)
- 7.38 (d, 2H)
- 7.36 (d, 2H)
- 7.34 (d, 2H)
- 7.32 (d, 2H)
- 7.30 (d, 2H)
- 7.28 (d, 2H)
- 7.26 (d, 2H)
- 7.24 (d, 2H)
- 7.22 (d, 2H)
- 7.20 (d, 2H)
- 7.18 (d, 2H)
- 7.16 (d, 2H)
- 7.14 (d, 2H)
- 7.12 (d, 2H)
- 7.10 (d, 2H)
- 7.08 (d, 2H)
- 7.06 (d, 2H)
- 7.04 (d, 2H)
- 7.02 (d, 2H)
- 7.00 (d, 2H)
- 6.98 (d, 2H)
- 6.96 (d, 2H)
- 6.94 (d, 2H)
- 6.92 (d, 2H)
- 6.90 (d, 2H)
- 6.88 (d, 2H)
- 6.86 (d, 2H)
- 6.84 (d, 2H)
- 6.82 (d, 2H)
- 6.80 (d, 2H)
- 6.78 (d, 2H)
- 6.76 (d, 2H)
- 6.74 (d, 2H)
- 6.72 (d, 2H)
- 6.70 (d, 2H)
- 6.68 (d, 2H)
- 6.66 (d, 2H)
- 6.64 (d, 2H)
- 6.62 (d, 2H)
- 6.60 (d, 2H)
- 6.58 (d, 2H)
- 6.56 (d, 2H)
- 6.54 (d, 2H)
- 6.52 (d, 2H)
- 6.50 (d, 2H)
- 6.48 (d, 2H)
- 6.46 (d, 2H)
- 6.44 (d, 2H)
- 6.42 (d, 2H)
- 6.40 (d, 2H)
- 6.38 (d, 2H)
- 6.36 (d, 2H)
- 6.34 (d, 2H)
- 6.32 (d, 2H)
- 6.30 (d, 2H)
- 6.28 (d, 2H)
- 6.26 (d, 2H)
- 6.24 (d, 2H)
- 6.22 (d, 2H)
- 6.20 (d, 2H)
- 6.18 (d, 2H)
- 6.16 (d, 2H)
- 6.14 (d, 2H)
- 6.12 (d, 2H)
- 6.10 (d, 2H)
- 6.08 (d, 2H)
- 6.06 (d, 2H)
- 6.04 (d, 2H)
- 6.02 (d, 2H)
- 6.00 (d, 2H)
- 5.98 (d, 2H)
- 5.96 (d, 2H)
- 5.94 (d, 2H)
- 5.92 (d, 2H)
- 5.90 (d, 2H)
- 5.88 (d, 2H)
- 5.86 (d, 2H)
- 5.84 (d, 2H)
- 5.82 (d, 2H)
- 5.80 (d, 2H)
- 5.78 (d, 2H)
- 5.76 (d, 2H)
- 5.74 (d, 2H)
- 5.72 (d, 2H)
- 5.70 (d, 2H)
- 5.68 (d, 2H)
- 5.66 (d, 2H)
- 5.64 (d, 2H)
- 5.62 (d, 2H)
- 5.60 (d, 2H)
- 5.58 (d, 2H)
- 5.56 (d, 2H)
- 5.54 (d, 2H)
- 5.52 (d, 2H)
- 5.50 (d, 2H)
- 5.48 (d, 2H)
- 5.46 (d, 2H)
- 5.44 (d, 2H)
- 5.42 (d, 2H)
- 5.40 (d, 2H)
- 5.38 (d, 2H)
- 5.36 (d, 2H)
- 5.34 (d, 2H)
- 5.32 (d, 2H)
- 5.30 (d, 2H)
- 5.28 (d, 2H)
- 5.26 (d, 2H)
- 5.24 (d, 2H)
- 5.22 (d, 2H)
- 5.20 (d, 2H)
- 5.18 (d, 2H)
- 5.16 (d, 2H)
- 5.14 (d, 2H)
- 5.12 (d, 2H)
- 5.10 (d, 2H)
- 5.08 (d, 2H)
- 5.06 (d, 2H)
- 5.04 (d, 2H)
- 5.02 (d, 2H)
- 5.00 (d, 2H)
- 4.98 (d, 2H)
- 4.96 (d, 2H)
- 4.94 (d, 2H)
- 4.92 (d, 2H)
- 4.90 (d, 2H)
- 4.88 (d, 2H)
- 4.86 (d, 2H)
- 4.84 (d, 2H)
- 4.82 (d, 2H)
- 4.80 (d, 2H)
- 4.78 (d, 2H)
- 4.76 (d, 2H)
- 4.74 (d, 2H)
- 4.72 (d, 2H)
- 4.70 (d, 2H)
- 4.68 (d, 2H)
- 4.66 (d, 2H)
- 4.64 (d, 2H)
- 4.62 (d, 2H)
- 4.60 (d, 2H)
- 4.58 (d, 2H)
- 4.56 (d, 2H)
- 4.54 (d, 2H)
- 4.52 (d, 2H)
- 4.50 (d, 2H)
- 4.48 (d, 2H)
- 4.46 (d, 2H)
- 4.44 (d, 2H)
- 4.42 (d, 2H)
- 4.40 (d, 2H)
- 4.38 (d, 2H)
- 4.36 (d, 2H)
- 4.34 (d, 2H)
- 4.32 (d, 2H)
- 4.30 (d, 2H)
- 4.28 (d, 2H)
- 4.26 (d, 2H)
- 4.24 (d, 2H)
- 4.22 (d, 2H)
- 4.20 (d, 2H)
- 4.18 (d, 2H)
- 4.16 (d, 2H)
- 4.14 (d, 2H)
- 4.12 (d, 2H)
- 4.10 (d, 2H)
- 4.08 (d, 2H)
- 4.06 (d, 2H)
- 4.04 (d, 2H)
- 4.02 (d, 2H)
- 4.00 (d, 2H)
- 3.98 (d, 2H)
- 3.96 (d, 2H)
- 3.94 (d, 2H)
- 3.92 (d, 2H)
- 3.90 (d, 2H)
- 3.88 (d, 2H)
- 3.86 (d, 2H)
- 3.84 (d, 2H)
- 3.82 (d, 2H)
- 3.80 (d, 2H)
- 3.78 (d, 2H)
- 3.76 (d, 2H)
- 3.74 (d, 2H)
- 3.72 (d, 2H)
- 3.70 (d, 2H)
- 3.68 (d, 2H)
- 3.66 (d, 2H)
- 3.64 (d, 2H)
- 3.62 (d, 2H)
- 3.60 (d, 2H)
- 3.58 (d, 2H)
- 3.56 (d, 2H)
- 3.54 (d, 2H)
- 3.52 (d, 2H)
- 3.50 (d, 2H)
- 3.48 (d, 2H)
- 3.46 (d, 2H)
- 3.44 (d, 2H)
- 3.42 (d, 2H)
- 3.40 (d, 2H)
- 3.38 (d, 2H)
- 3.36 (d, 2H)
- 3.34 (d, 2H)
- 3.32 (d, 2H)
- 3.30 (d, 2H)
- 3.28 (d, 2H)
- 3.26 (d, 2H)
- 3.24 (d, 2H)
- 3.22 (d, 2H)
- 3.20 (d, 2H)
- 3.18 (d, 2H)
- 3.16 (d, 2H)
- 3.14 (d, 2H)
- 3.12 (d, 2H)
- 3.10 (d, 2H)
- 3.08 (d, 2H)
- 3.06 (d, 2H)
- 3.04 (d, 2H)
- 3.02 (d, 2H)
- 3.00 (d, 2H)
- 2.98 (d, 2H)
- 2.96 (d, 2H)
- 2.94 (d, 2H)
- 2.92 (d, 2H)
- 2.90 (d, 2H)
- 2.88 (d, 2H)
- 2.86 (d, 2H)
- 2.84 (d, 2

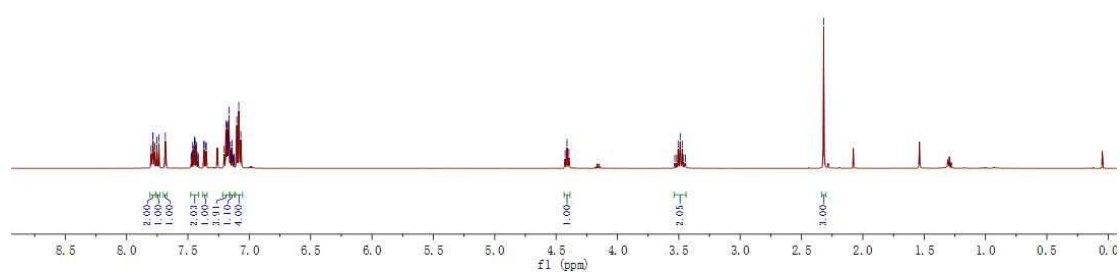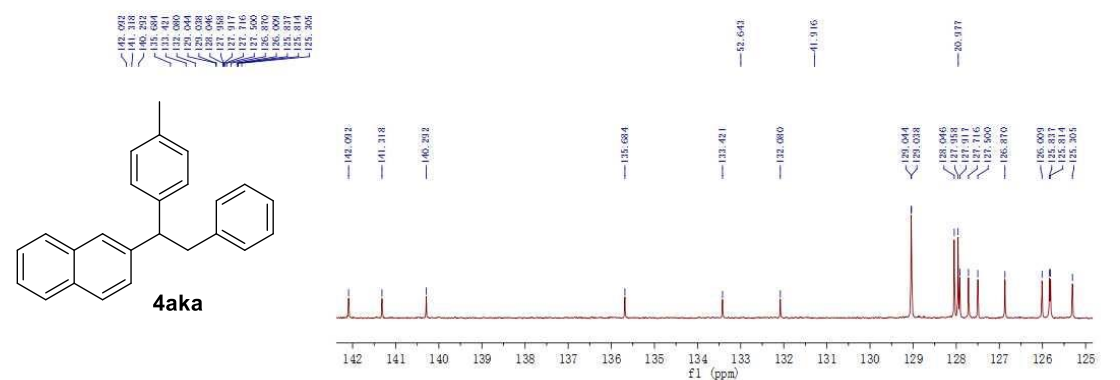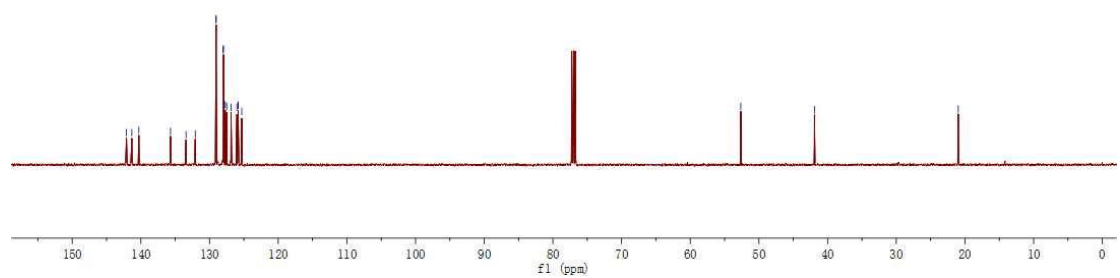



The figure displays the chemical structure of compound 4ala and its corresponding <sup>1</sup>H and <sup>13</sup>C NMR spectra.

**Chemical Structure of 4ala:** COc1ccc(cc1)CC(Cc2ccc(C)cc2)c3ccc4ccccc4c3

**<sup>1</sup>H NMR Spectrum (Top):** The spectrum shows peaks in the aromatic region (6.5-7.9 ppm) and aliphatic region (3.4-3.7 ppm). Integration values are provided below the peaks.

| Chemical Shift (ppm)                                                                                                                                                                                                                                                                                                                                                                                                                                                                                                                                                                                                                                                                                                                                                                                                                                                                                                                                                                                                                                                                                                                                                                                                                                                                                                                                                                                                                                                                                                                                                                                                                                                                                                                                                                                                                                                                                                                                                                                                                                                                                                                                                                                                                                                                                                                                                                                                                                                                                                                                                                                                                                                                                                                                                                                                                                                                                                                                                                                                                                                                                                                                                                                                                                                                                                                                                                                                                                                                                                                                                                                                                                                                                                                                                                                                                                                                                                                                                                                                                                   | Integration |
|--------------------------------------------------------------------------------------------------------------------------------------------------------------------------------------------------------------------------------------------------------------------------------------------------------------------------------------------------------------------------------------------------------------------------------------------------------------------------------------------------------------------------------------------------------------------------------------------------------------------------------------------------------------------------------------------------------------------------------------------------------------------------------------------------------------------------------------------------------------------------------------------------------------------------------------------------------------------------------------------------------------------------------------------------------------------------------------------------------------------------------------------------------------------------------------------------------------------------------------------------------------------------------------------------------------------------------------------------------------------------------------------------------------------------------------------------------------------------------------------------------------------------------------------------------------------------------------------------------------------------------------------------------------------------------------------------------------------------------------------------------------------------------------------------------------------------------------------------------------------------------------------------------------------------------------------------------------------------------------------------------------------------------------------------------------------------------------------------------------------------------------------------------------------------------------------------------------------------------------------------------------------------------------------------------------------------------------------------------------------------------------------------------------------------------------------------------------------------------------------------------------------------------------------------------------------------------------------------------------------------------------------------------------------------------------------------------------------------------------------------------------------------------------------------------------------------------------------------------------------------------------------------------------------------------------------------------------------------------------------------------------------------------------------------------------------------------------------------------------------------------------------------------------------------------------------------------------------------------------------------------------------------------------------------------------------------------------------------------------------------------------------------------------------------------------------------------------------------------------------------------------------------------------------------------------------------------------------------------------------------------------------------------------------------------------------------------------------------------------------------------------------------------------------------------------------------------------------------------------------------------------------------------------------------------------------------------------------------------------------------------------------------------------------------------|-------------|
| 7.823, 7.821, 7.819, 7.797, 7.795, 7.793, 7.791, 7.789, 7.787, 7.785, 7.783, 7.781, 7.779, 7.777, 7.775, 7.773, 7.771, 7.769, 7.767, 7.765, 7.763, 7.761, 7.759, 7.757, 7.755, 7.753, 7.751, 7.749, 7.747, 7.745, 7.743, 7.741, 7.739, 7.737, 7.735, 7.733, 7.731, 7.729, 7.727, 7.725, 7.723, 7.721, 7.719, 7.717, 7.715, 7.713, 7.711, 7.709, 7.707, 7.705, 7.703, 7.701, 7.699, 7.697, 7.695, 7.693, 7.691, 7.689, 7.687, 7.685, 7.683, 7.681, 7.679, 7.677, 7.675, 7.673, 7.671, 7.669, 7.667, 7.665, 7.663, 7.661, 7.659, 7.657, 7.655, 7.653, 7.651, 7.649, 7.647, 7.645, 7.643, 7.641, 7.639, 7.637, 7.635, 7.633, 7.631, 7.629, 7.627, 7.625, 7.623, 7.621, 7.619, 7.617, 7.615, 7.613, 7.611, 7.609, 7.607, 7.605, 7.603, 7.601, 7.599, 7.597, 7.595, 7.593, 7.591, 7.589, 7.587, 7.585, 7.583, 7.581, 7.579, 7.577, 7.575, 7.573, 7.571, 7.569, 7.567, 7.565, 7.563, 7.561, 7.559, 7.557, 7.555, 7.553, 7.551, 7.549, 7.547, 7.545, 7.543, 7.541, 7.539, 7.537, 7.535, 7.533, 7.531, 7.529, 7.527, 7.525, 7.523, 7.521, 7.519, 7.517, 7.515, 7.513, 7.511, 7.509, 7.507, 7.505, 7.503, 7.501, 7.499, 7.497, 7.495, 7.493, 7.491, 7.489, 7.487, 7.485, 7.483, 7.481, 7.479, 7.477, 7.475, 7.473, 7.471, 7.469, 7.467, 7.465, 7.463, 7.461, 7.459, 7.457, 7.455, 7.453, 7.451, 7.449, 7.447, 7.445, 7.443, 7.441, 7.439, 7.437, 7.435, 7.433, 7.431, 7.429, 7.427, 7.425, 7.423, 7.421, 7.419, 7.417, 7.415, 7.413, 7.411, 7.409, 7.407, 7.405, 7.403, 7.401, 7.399, 7.397, 7.395, 7.393, 7.391, 7.389, 7.387, 7.385, 7.383, 7.381, 7.379, 7.377, 7.375, 7.373, 7.371, 7.369, 7.367, 7.365, 7.363, 7.361, 7.359, 7.357, 7.355, 7.353, 7.351, 7.349, 7.347, 7.345, 7.343, 7.341, 7.339, 7.337, 7.335, 7.333, 7.331, 7.329, 7.327, 7.325, 7.323, 7.321, 7.319, 7.317, 7.315, 7.313, 7.311, 7.309, 7.307, 7.305, 7.303, 7.301, 7.299, 7.297, 7.295, 7.293, 7.291, 7.289, 7.287, 7.285, 7.283, 7.281, 7.279, 7.277, 7.275, 7.273, 7.271, 7.269, 7.267, 7.265, 7.263, 7.261, 7.259, 7.257, 7.255, 7.253, 7.251, 7.249, 7.247, 7.245, 7.243, 7.241, 7.239, 7.237, 7.235, 7.233, 7.231, 7.229, 7.227, 7.225, 7.223, 7.221, 7.219, 7.217, 7.215, 7.213, 7.211, 7.209, 7.207, 7.205, 7.203, 7.201, 7.199, 7.197, 7.195, 7.193, 7.191, 7.189, 7.187, 7.185, 7.183, 7.181, 7.179, 7.177, 7.175, 7.173, 7.171, 7.169, 7.167, 7.165, 7.163, 7.161, 7.159, 7.157, 7.155, 7.153, 7.151, 7.149, 7.147, 7.145, 7.143, 7.141, 7.139, 7.137, 7.135, 7.133, 7.131, 7.129, 7.127, 7.125, 7.123, 7.121, 7.119, 7.117, 7.115, 7.113, 7.111, 7.109, 7.107, 7.105, 7.103, 7.101, 7.099, 7.097, 7.095, 7.093, 7.091, 7.089, 7.087, 7.085, 7.083, 7.081, 7.079, 7.077, 7.075, 7.073, 7.071, 7.069, 7.067, 7.065, 7.063, 7.061, 7.059, 7.057, 7.055, 7.053, 7.051, 7.049, 7.047, 7.045, 7.043, 7.041, 7.039, 7.037, 7.035, 7.033, 7.031, 7.029, 7.027, 7.025, 7.023, 7.021, 7.019, 7.017, 7.015, 7.013, 7.011, 7.009, 7.007, 7.005, 7.003, 7.001, 6.999, 6.997, 6.995, 6.993, 6.991, 6.989, 6.987, 6.985, 6.983, 6.981, 6.979, 6.977, 6.975, 6.973, 6.971, 6.969, 6.967, 6.965, 6.963, 6.961, 6.959, 6.957, 6.955, 6.953, 6.951, 6.949, 6.947, 6.945, 6.943, 6.941, 6.939, 6.937, 6.935, 6.933, 6.931, 6.929, 6.927, 6.925, 6.923, 6.921, 6.919, 6.917, 6.915, 6.913, 6.911, 6.909, 6.907, 6.905, 6.903, 6.901, 6.899, 6.897, 6.895, 6.893, 6.891, 6.889, 6.887, 6.885, 6.883, 6.881, 6.879, 6.877, 6.875, 6.873, 6.871, 6.869, 6.867, 6.865, 6.863, 6.861, 6.859, 6.857, 6.855, 6.853, 6.851, 6.849, 6.847, 6.845, 6.843, 6.841, 6.839, 6.837, 6.835, 6.833, 6.831, 6.829, 6.827, 6.825, 6.823, 6.821, 6.819, 6.817, 6.815, 6.813, 6.811, 6.809, 6.807, 6.805, 6.803, 6.801, 6.799, 6.797, 6.795, 6.793, 6.791, 6.789, 6.787, 6.785, 6.783, 6.781, 6.779, 6.777, 6.775, 6.773, 6.771, 6.769, 6.767, 6.765, 6.763, 6.761, 6.759, 6.757, 6.755, 6.753, 6.751, 6.749, 6.747, 6.745, 6.743, 6.741, 6.739, 6.737, 6.735, 6.733, 6.731, 6.729, 6.727, 6.725, 6.723, 6.721, 6.719, 6.717, 6.715, 6.713, 6.711, 6.709, 6.707, 6.705, 6.703, 6.701, 6.699, 6.697, 6.695, 6.693, 6. |             |



## 2-(2-(4-nitrophenyl)-1-(p-tolyl)ethyl)naphthalene (4ama)

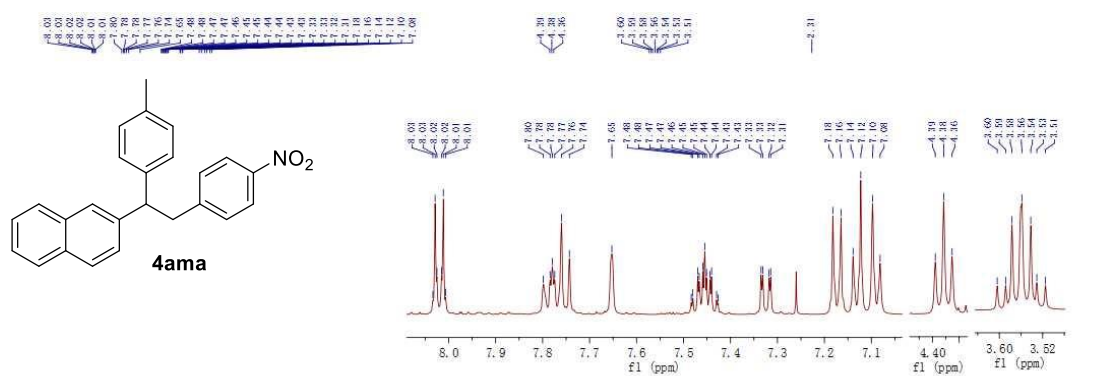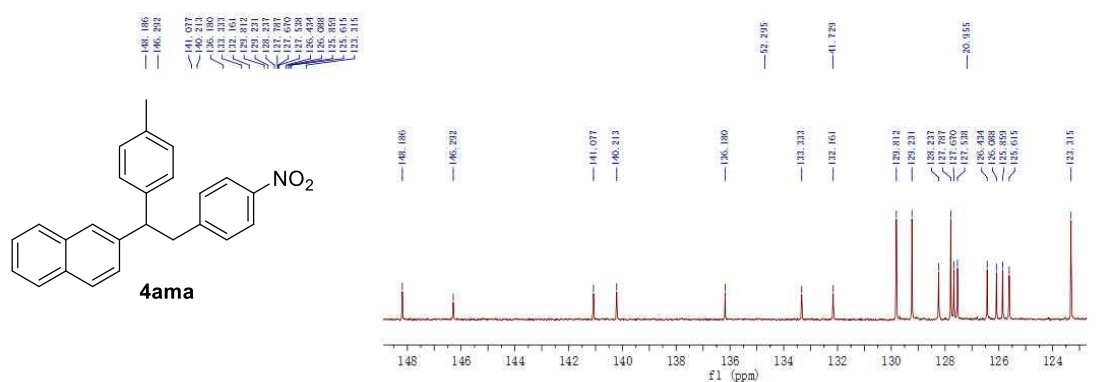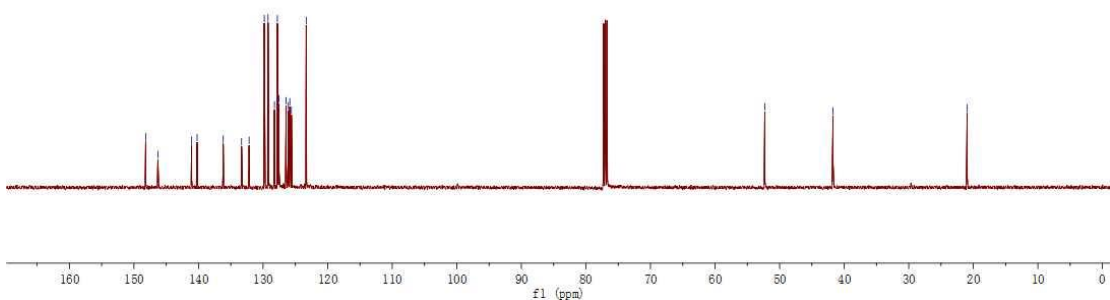



The figure displays the chemical structure of compound 4ana and its corresponding <sup>1</sup>H and <sup>13</sup>C NMR spectra.

**Chemical Structure of 4ana:** CC(=O)c1ccc(cc1)CC(c2ccc(C)cc2)c3ccc4ccccc4c3

**<sup>1</sup>H NMR Spectrum (CDCl<sub>3</sub>):**

- Chemical Shifts (ppm):** 7.80, 7.79, 7.78, 7.76, 7.75, 7.74, 7.73, 7.72, 7.71, 7.69, 7.68, 7.66, 7.65, 7.64, 7.63, 7.62, 7.61, 7.60, 7.59, 7.58, 7.57, 7.56, 7.55, 7.54, 7.53, 7.52, 7.51, 7.50, 7.49, 7.48, 7.47, 7.46, 7.45, 7.44, 7.43, 7.42, 7.41, 7.40, 7.39, 7.38, 7.37, 7.36, 7.35, 7.34, 7.33, 7.32, 7.31, 7.30, 7.29, 7.28, 7.27, 7.26, 7.25, 7.24, 7.23, 7.22, 7.21, 7.20, 7.19, 7.18, 7.17, 7.16, 7.15, 7.14, 7.13, 7.12, 7.11, 7.10, 7.09, 7.08, 7.07, 7.06, 7.05, 7.04, 7.03, 7.02, 7.01, 7.00, 6.99, 6.98, 6.97, 6.96, 6.95, 6.94, 6.93, 6.92, 6.91, 6.90, 6.89, 6.88, 6.87, 6.86, 6.85, 6.84, 6.83, 6.82, 6.81, 6.80, 6.79, 6.78, 6.77, 6.76, 6.75, 6.74, 6.73, 6.72, 6.71, 6.70, 6.69, 6.68, 6.67, 6.66, 6.65, 6.64, 6.63, 6.62, 6.61, 6.60, 6.59, 6.58, 6.57, 6.56, 6.55, 6.54, 6.53, 6.52, 6.51, 6.50, 6.49, 6.48, 6.47, 6.46, 6.45, 6.44, 6.43, 6.42, 6.41, 6.40, 6.39, 6.38, 6.37, 6.36, 6.35, 6.34, 6.33, 6.32, 6.31, 6.30, 6.29, 6.28, 6.27, 6.26, 6.25, 6.24, 6.23, 6.22, 6.21, 6.20, 6.19, 6.18, 6.17, 6.16, 6.15, 6.14, 6.13, 6.12, 6.11, 6.10, 6.09, 6.08, 6.07, 6.06, 6.05, 6.04, 6.03, 6.02, 6.01, 6.00, 5.99, 5.98, 5.97, 5.96, 5.95, 5.94, 5.93, 5.92, 5.91, 5.90, 5.89, 5.88, 5.87, 5.86, 5.85, 5.84, 5.83, 5.82, 5.81, 5.80, 5.79, 5.78, 5.77, 5.76, 5.75, 5.74, 5.73, 5.72, 5.71, 5.70, 5.69, 5.68, 5.67, 5.66, 5.65, 5.64, 5.63, 5.62, 5.61, 5.60, 5.59, 5.58, 5.57, 5.56, 5.55, 5.54, 5.53, 5.52, 5.51, 5.50, 5.49, 5.48, 5.47, 5.46, 5.45, 5.44, 5.43, 5.42, 5.41, 5.40, 5.39, 5.38, 5.37, 5.36, 5.35, 5.34, 5.33, 5.32, 5.31, 5.30, 5.29, 5.28, 5.27, 5.26, 5.25, 5.24, 5.23, 5.22, 5.21, 5.20, 5.19, 5.18, 5.17, 5.16, 5.15, 5.14, 5.13, 5.12, 5.11, 5.10, 5.09, 5.08, 5.07, 5.06, 5.05, 5.04, 5.03, 5.02, 5.01, 5.00, 4.99, 4.98, 4.97, 4.96, 4.95, 4.94, 4.93, 4.92, 4.91, 4.90, 4.89, 4.88, 4.87, 4.86, 4.85, 4.84, 4.83, 4.82, 4.81, 4.80, 4.79, 4.78, 4.77, 4.76, 4.75, 4.74, 4.73, 4.72, 4.71, 4.70, 4.69, 4.68, 4.67, 4.66, 4.65, 4.64, 4.63, 4.62, 4.61, 4.60, 4.59, 4.58, 4.57, 4.56, 4.55, 4.54, 4.53, 4.52, 4.51, 4.50, 4.49, 4.48, 4.47, 4.46, 4.45, 4.44, 4.43, 4.42, 4.41, 4.40, 4.39, 4.38, 4.37, 4.36, 4.35, 4.34, 4.33, 4.32, 4.31, 4.30, 4.29, 4.28, 4.27, 4.26, 4.25, 4.24, 4.23, 4.22, 4.21, 4.20, 4.19, 4.18, 4.17, 4.16, 4.15, 4.14, 4.13, 4.12, 4.11, 4.10, 4.09, 4.08, 4.07, 4.06, 4.05, 4.04, 4.03, 4.02, 4.01, 4.00, 3.99, 3.98, 3.97, 3.96, 3.95, 3.94, 3.93, 3.92, 3.91, 3.90, 3.89, 3.88, 3.87, 3.86, 3.85, 3.84, 3.83, 3.82, 3.81, 3.80, 3.79, 3.78, 3.77, 3.76, 3.75, 3.74, 3.73, 3.72, 3.71, 3.70, 3.69, 3.68, 3.67, 3.66, 3.65, 3.64, 3.63, 3.62, 3.61, 3.60, 3.59, 3.58, 3.57, 3.56, 3.55, 3.54, 3.53, 3.52, 3.51, 3.50, 3.49, 3.48, 3.47, 3.46, 3.45, 3.44, 3.43, 3.42, 3.41, 3.40, 3.39, 3.38, 3.37, 3.36, 3.35, 3.34, 3.33, 3.32, 3.31, 3.30, 3.29, 3.28, 3.27, 3.26, 3.25, 3.24, 3.23, 3.22, 3.21, 3.20, 3.19, 3.18, 3.17, 3.16, 3.15, 3.14, 3.13, 3.12, 3.11, 3.10, 3.09, 3.08, 3.07, 3.06, 3.05, 3.04, 3.03, 3.02, 3.01, 3.00, 2.99, 2.98, 2.97, 2.96, 2.95, 2.94, 2.93, 2.92, 2.91, 2.90, 2.89, 2.88, 2.87, 2.86, 2.85, 2.84, 2.83, 2.82, 2.81, 2.80, 2.79, 2.78, 2.77, 2.76, 2.75, 2.74, 2.73, 2.72, 2.71, 2.70, 2.69, 2.68, 2.67, 2.66, 2.65, 2.64, 2.63, 2.62, 2.61, 2.60, 2.59, 2.58, 2.57, 2.56, 2.55, 2.54, 2.53, 2.52, 2.51, 2.50, 2.49, 2.48, 2.47, 2.46, 2.45, 2.44, 2.43, 2.42, 2.41, 2.40, 2.39, 2.38, 2.37, 2.36, 2.35, 2.34, 2.33, 2.32, 2.31, 2.30, 2.29, 2.28, 2.27, 2.26, 2.25, 2.24, 2.23, 2.22, 2.21, 2.20, 2.19, 2.18, 2.17, 2.16, 2.15, 2.14, 2.13, 2.12, 2.11, 2.10, 2.09, 2.08, 2.07, 2.06, 2.05, 2.04, 2.03, 2.02, 2.01, 2.00, 1.99, 1.98, 1.97, 1.96, 1.95, 1.94, 1.93, 1.92, 1.91, 1.90, 1.89, 1.88, 1.87, 1.86, 1.85, 1.84, 1.83, 1.82, 1.81, 1.80, 1.79, 1.78, 1.77, 1.76, 1.75, 1.74, 1.73, 1.72, 1.71, 1.70, 1.69, 1.68, 1.67, 1.66, 1.65, 1.64, 1.63, 1.62, 1.61, 1.60, 1.59, 1.58, 1.57, 1.56, 1.55, 1.54, 1.53, 1.52, 1.51, 1.50, 1.49, 1.48, 1.47, 1.46, 1.45, 1.44, 1.43, 1.42, 1.41, 1.40, 1.39, 1.38, 1.37, 1.36, 1.35, 1.34, 1.33, 1.32, 1.31, 1.30, 1.29, 1.28, 1.27, 1.26, 1.25, 1.24, 1.23, 1.22, 1.21, 1.



[illegible]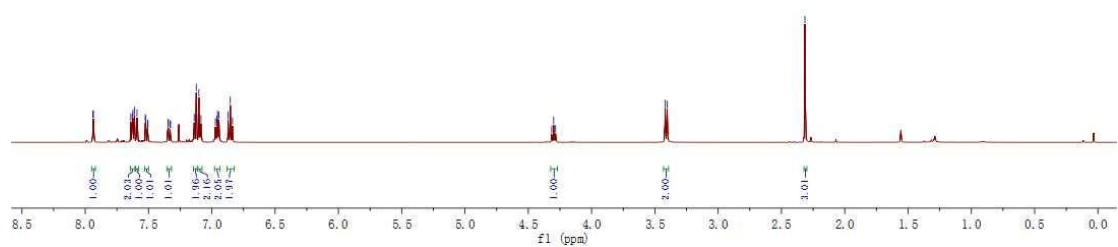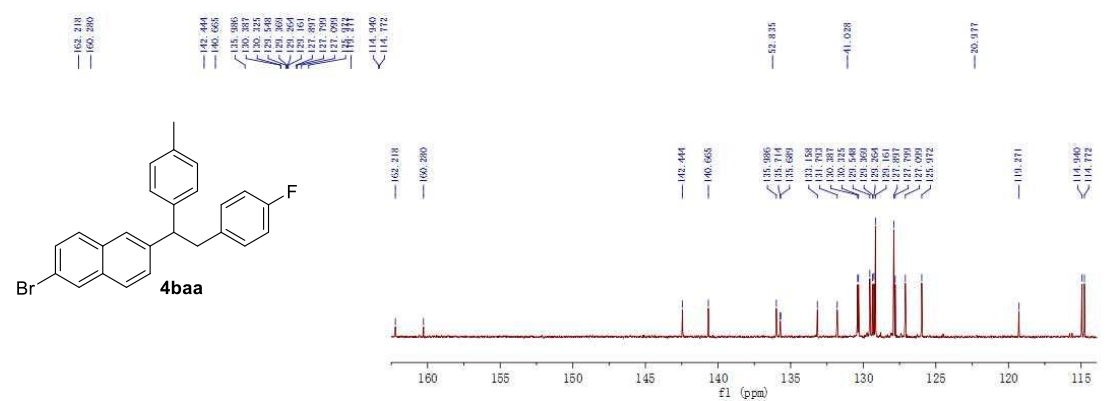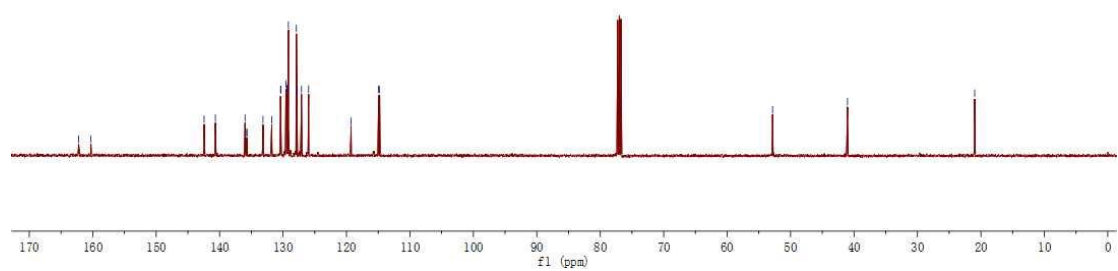



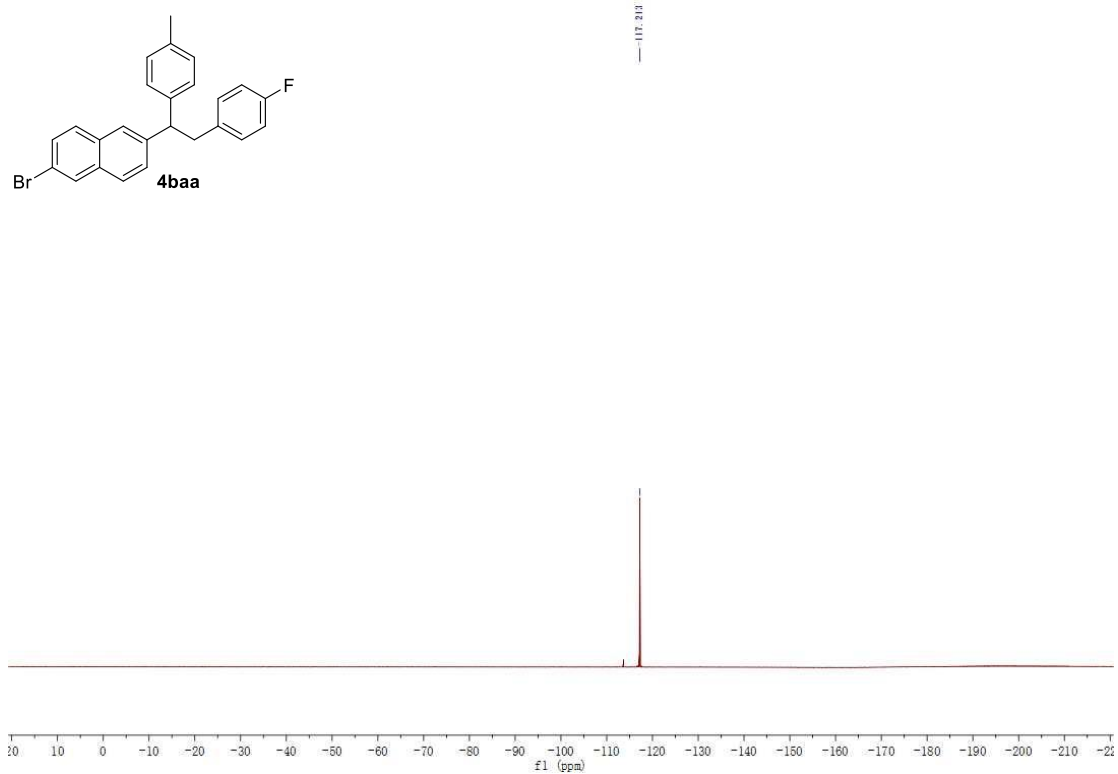



**2-fluoro-6-(2-(4-fluorophenyl)-1-(*p*-tolyl)ethyl)naphthalene (4caa)**

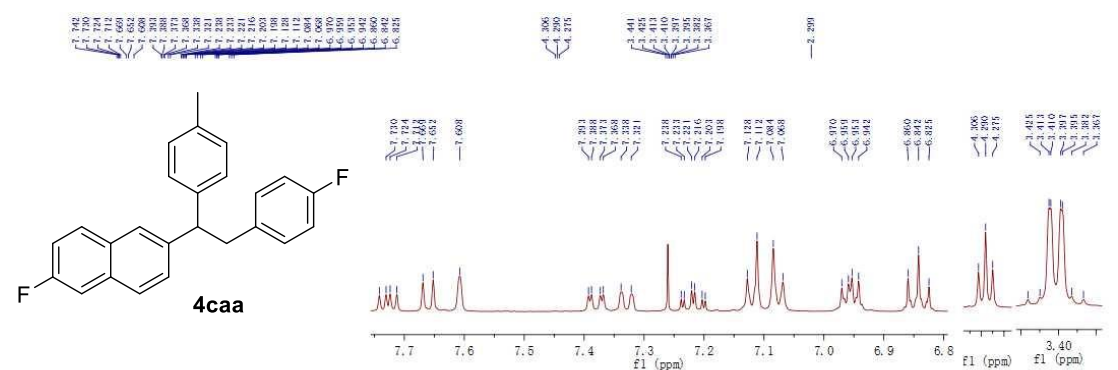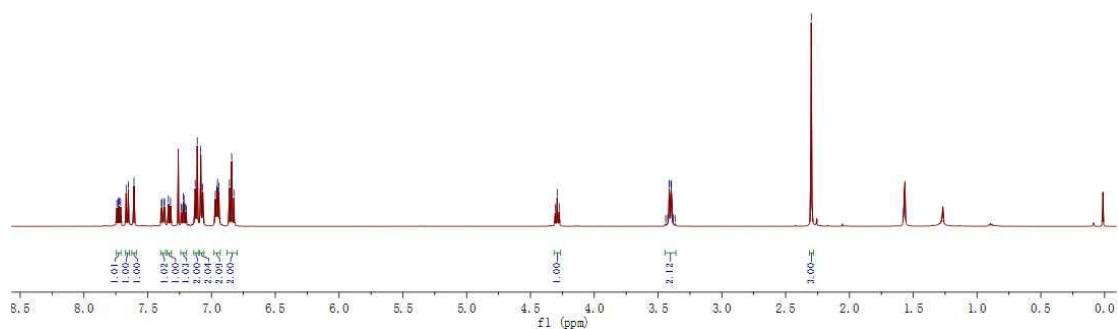



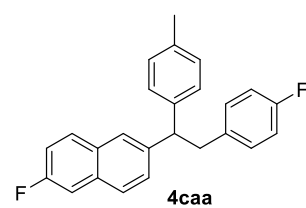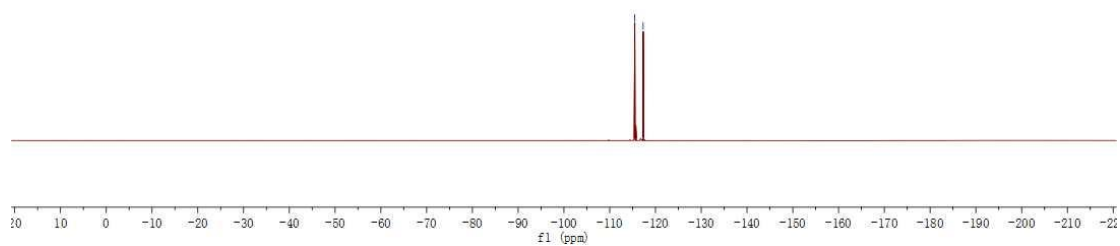

115.474  
 111.265



**2-(2-(4-fluorophenyl)-1-(p-tolylethyl)-6-methoxynaphthalene (4daa)**

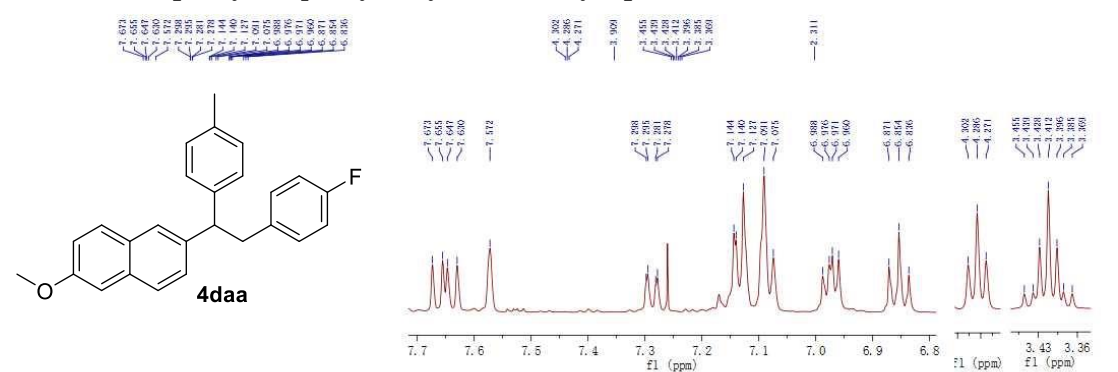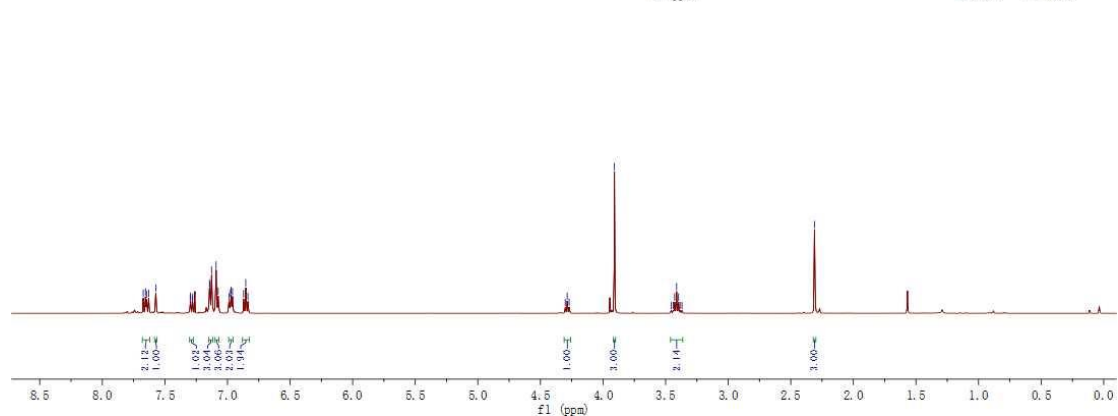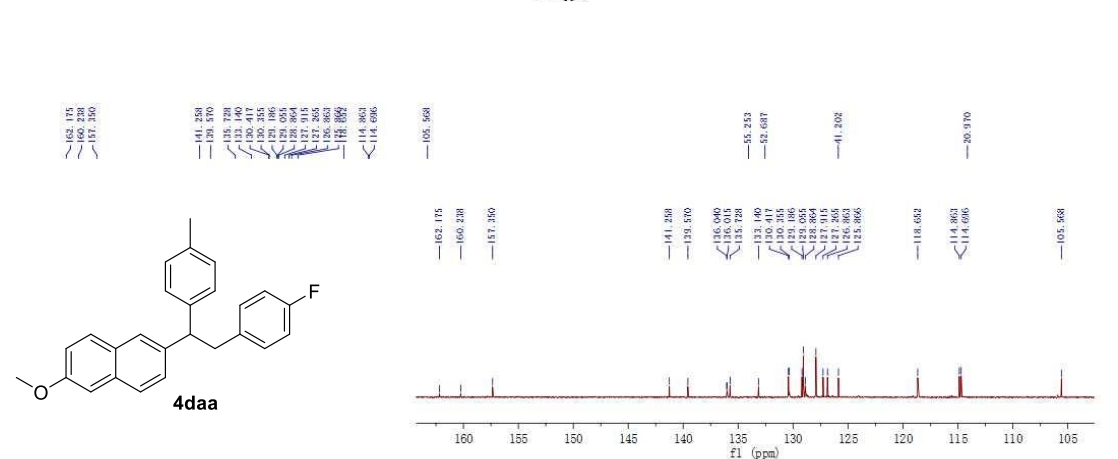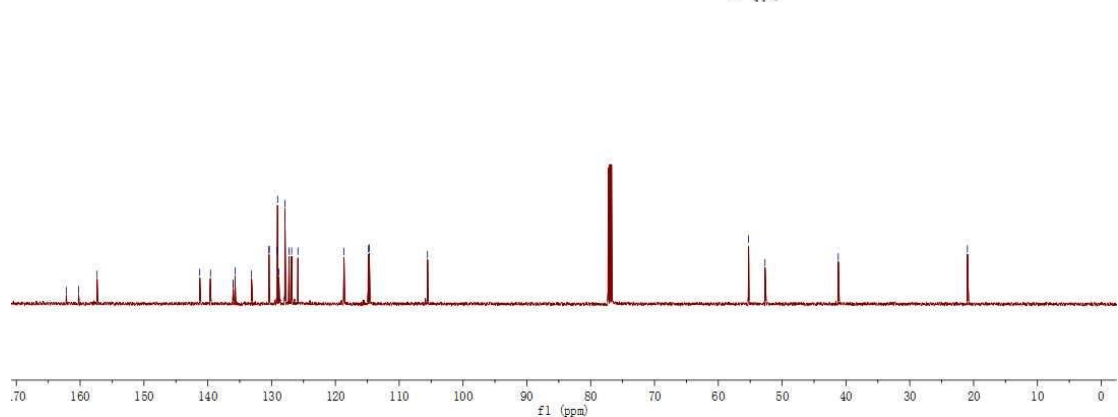



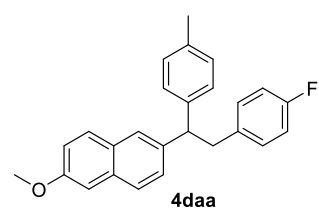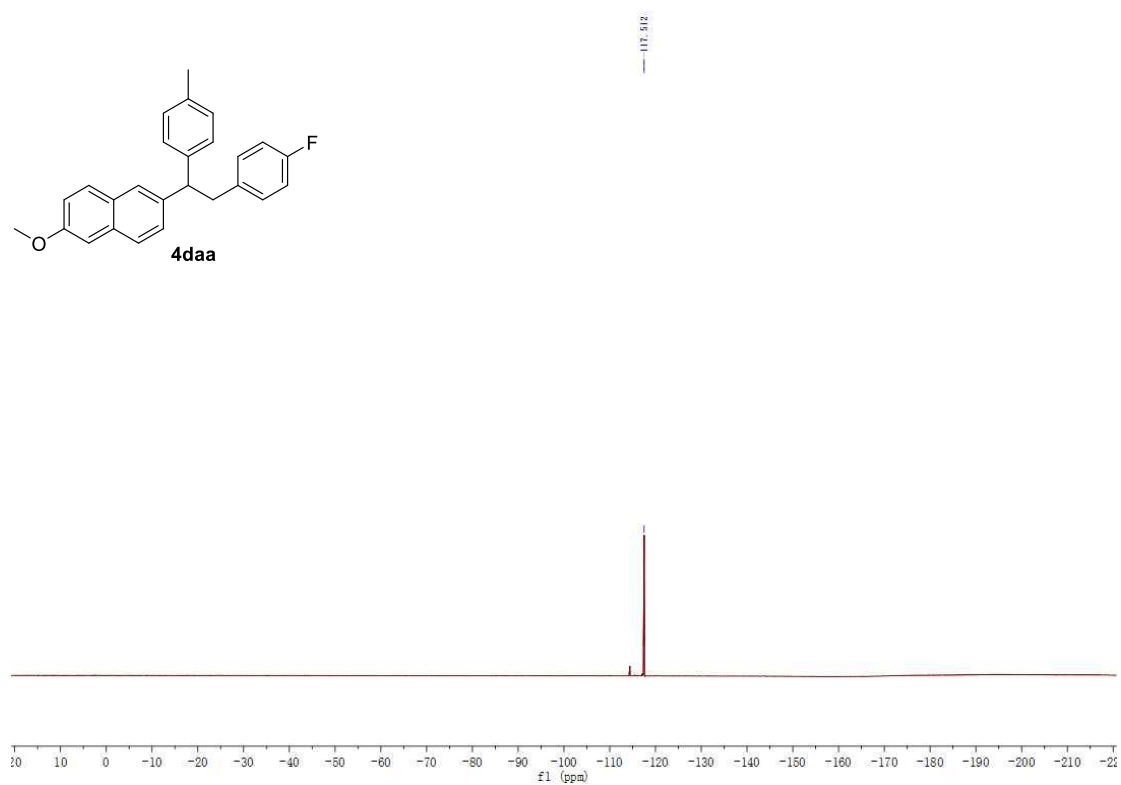



**4eaa**

Cc1ccc(cc1)C(CO)(CO)c2ccc(F)cc2

<sup>1</sup>H NMR spectrum (CDCl<sub>3</sub>) of compound **4eaa**. The spectrum shows peaks from 0.0 to 8.0 ppm. Key features include a sharp singlet at 2.371 ppm (3H, CH<sub>3</sub>), a multiplet between 6.8-7.1 ppm (aromatic protons), and a multiplet between 7.1-7.6 ppm (aromatic protons). Integration values are provided below the baseline.

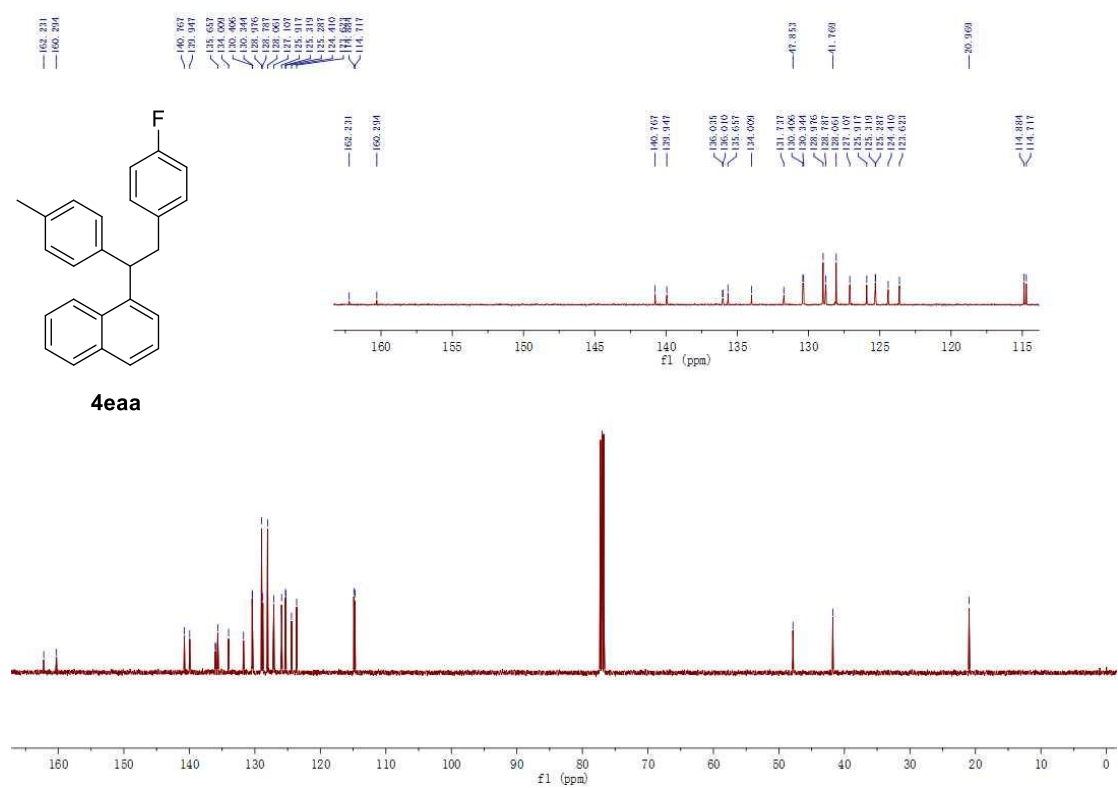



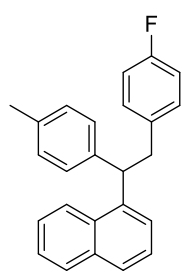

**4eaa**

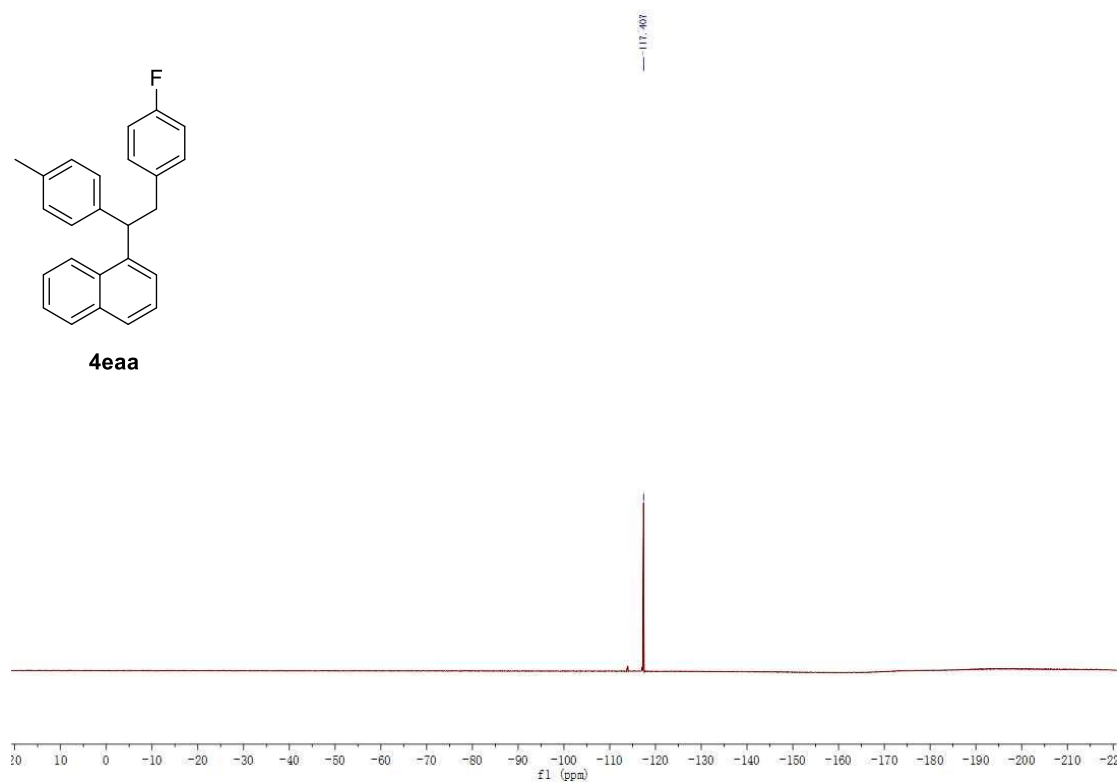



**4faa**

Cc1ccc(cc1)C(c2ccc(F)cc2)c3cc4ccccc4s3

<sup>1</sup>H NMR (CDCl<sub>3</sub>) spectrum of compound 4faa. The spectrum shows peaks in the aromatic region (6.8–7.8 ppm) and aliphatic region (3.4–4.3 ppm). Integration values are provided for each peak.

| Chemical Shift (ppm)                                                                      | Integration |
|-------------------------------------------------------------------------------------------|-------------|
| 7.747, 7.731                                                                              | 1.00        |
| 7.628, 7.601, 7.584, 7.551, 7.540, 7.524, 7.517, 7.506, 7.492, 7.477                      | 1.00        |
| 7.461, 7.454                                                                              | 1.00        |
| 7.360                                                                                     | 1.00        |
| 7.241, 7.240                                                                              | 1.00        |
| 7.180, 7.164, 7.100, 7.111, 7.076, 7.060, 7.047, 7.030, 7.013, 6.996, 6.964, 6.943, 6.937 | 1.00        |
| 6.860, 6.847, 6.838, 6.825                                                                | 1.00        |
| 4.269, 4.253                                                                              | 1.00        |
| 3.389, 3.374                                                                              | 1.00        |

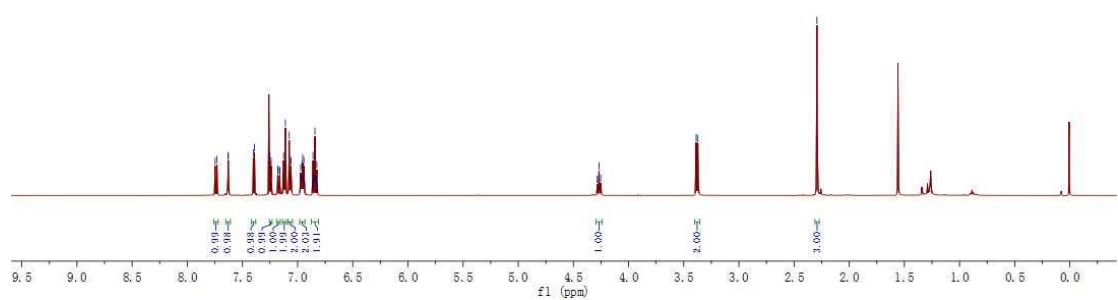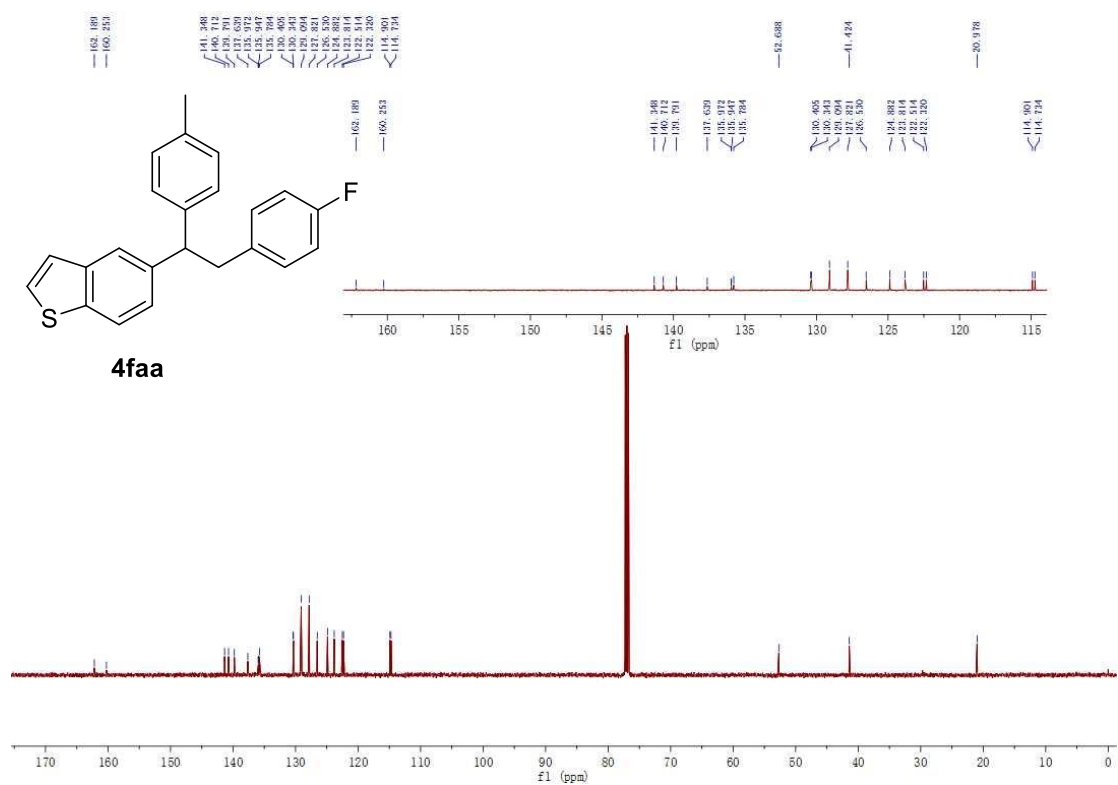



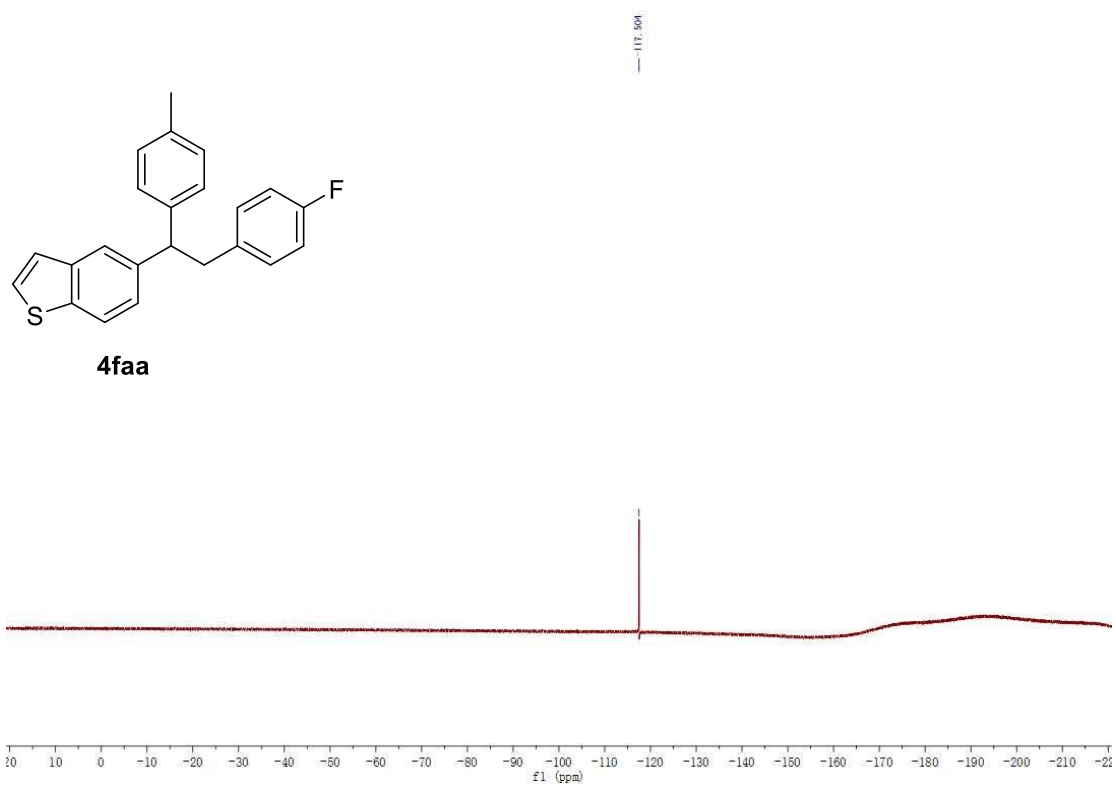



**3-(2-(*p*-tolyl)-1-(4-(trifluoromethyl)phenyl)ethyl)benzo[*b*]thiophene (4gbi).**

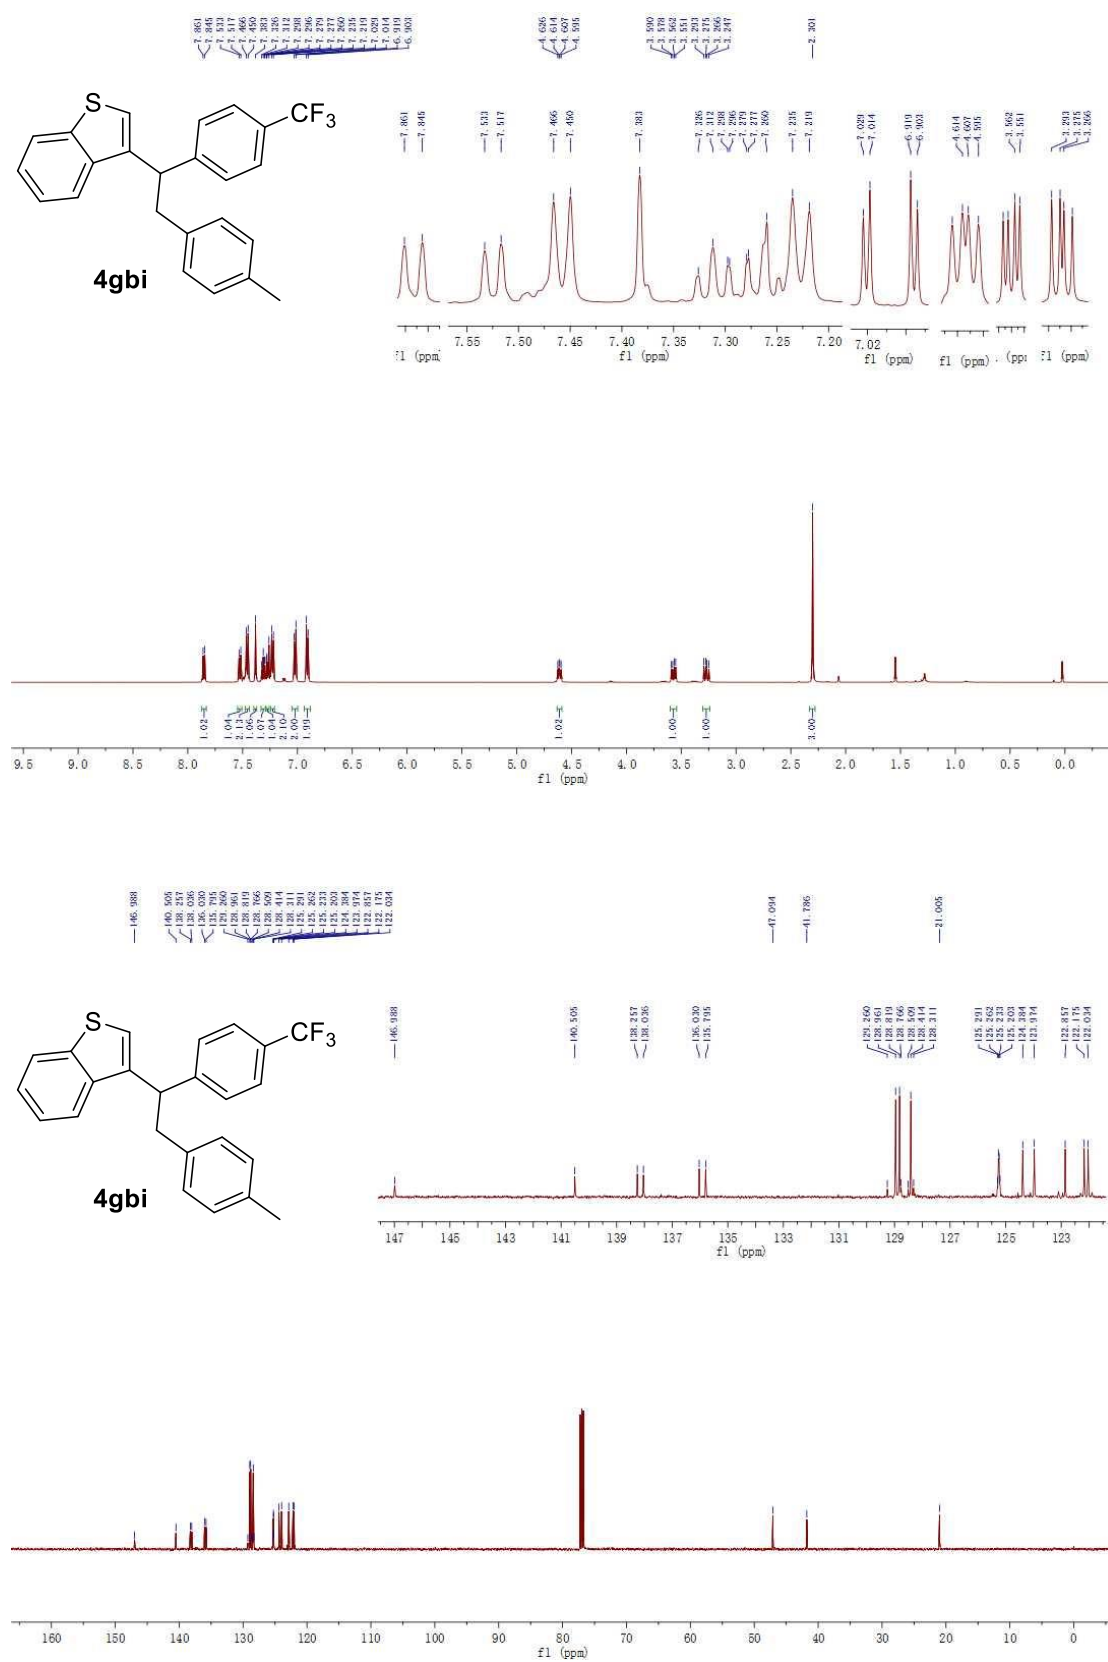



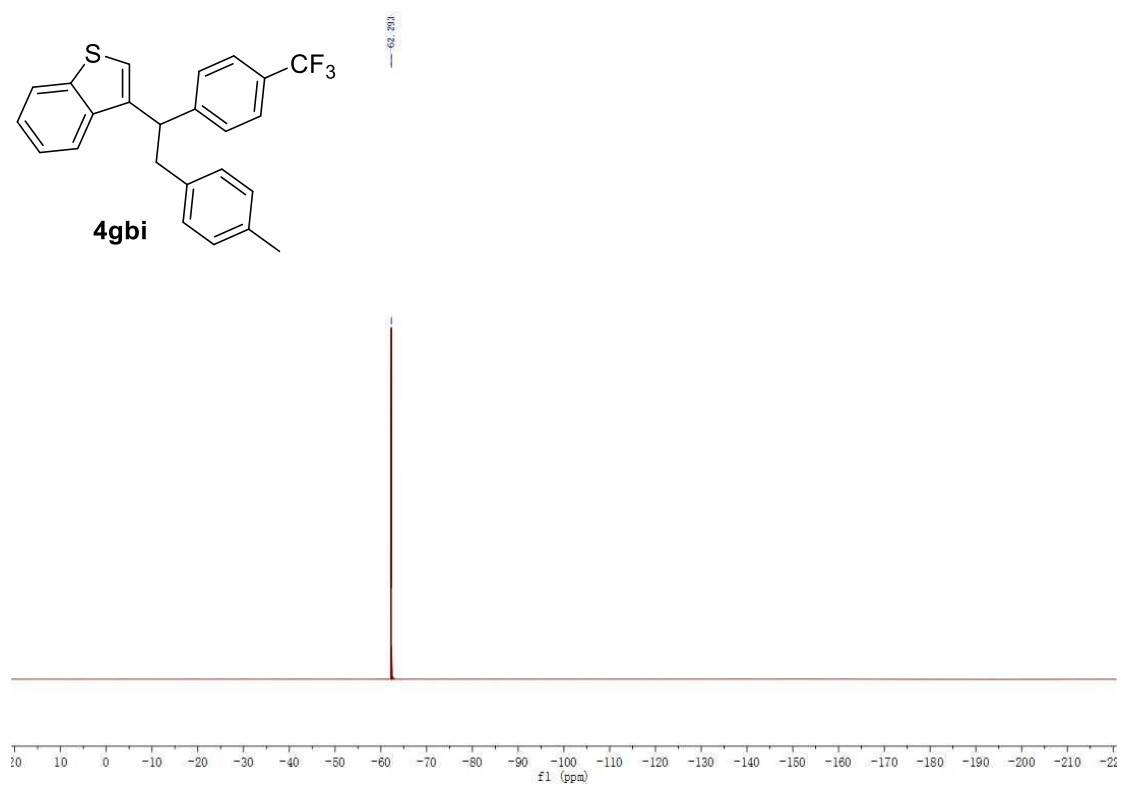



**4haa**

Chemical structure of **4haa** is shown. The <sup>1</sup>H NMR spectrum (CDCl<sub>3</sub>) is displayed below the structure, showing peaks from 8.3 to 3.4 ppm. The spectrum includes integrations for each peak group.

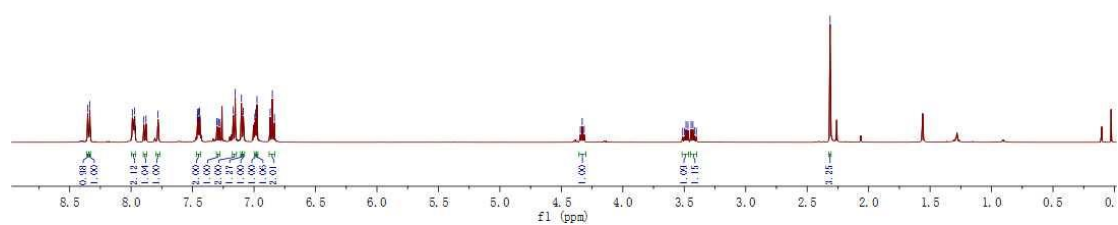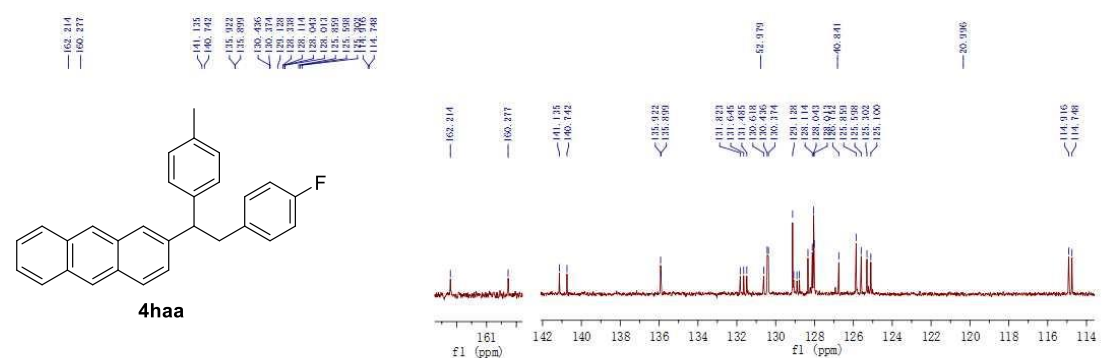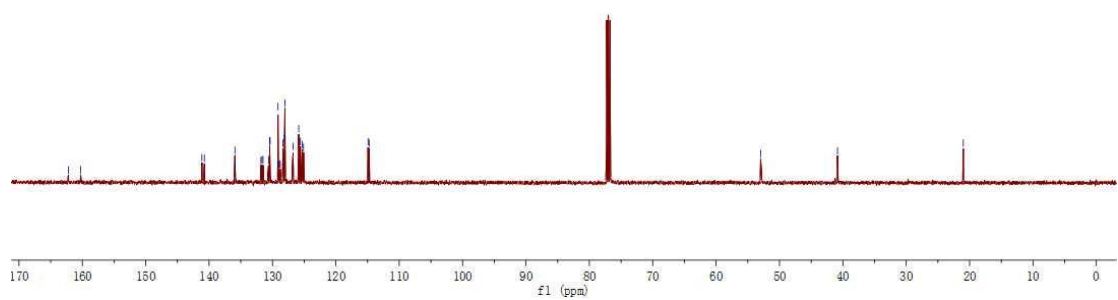



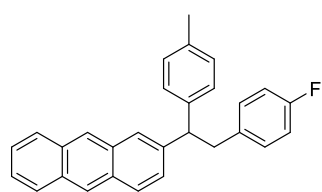

**4haa**

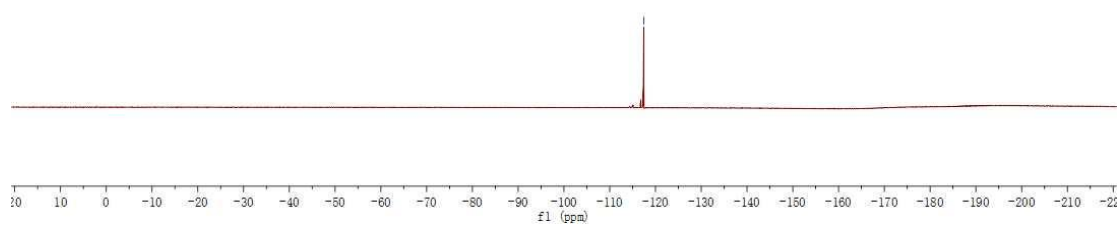



**9-(2-(4-fluorophenyl)-1-(*p*-tolylethyl)phenanthrene (4iaa)**

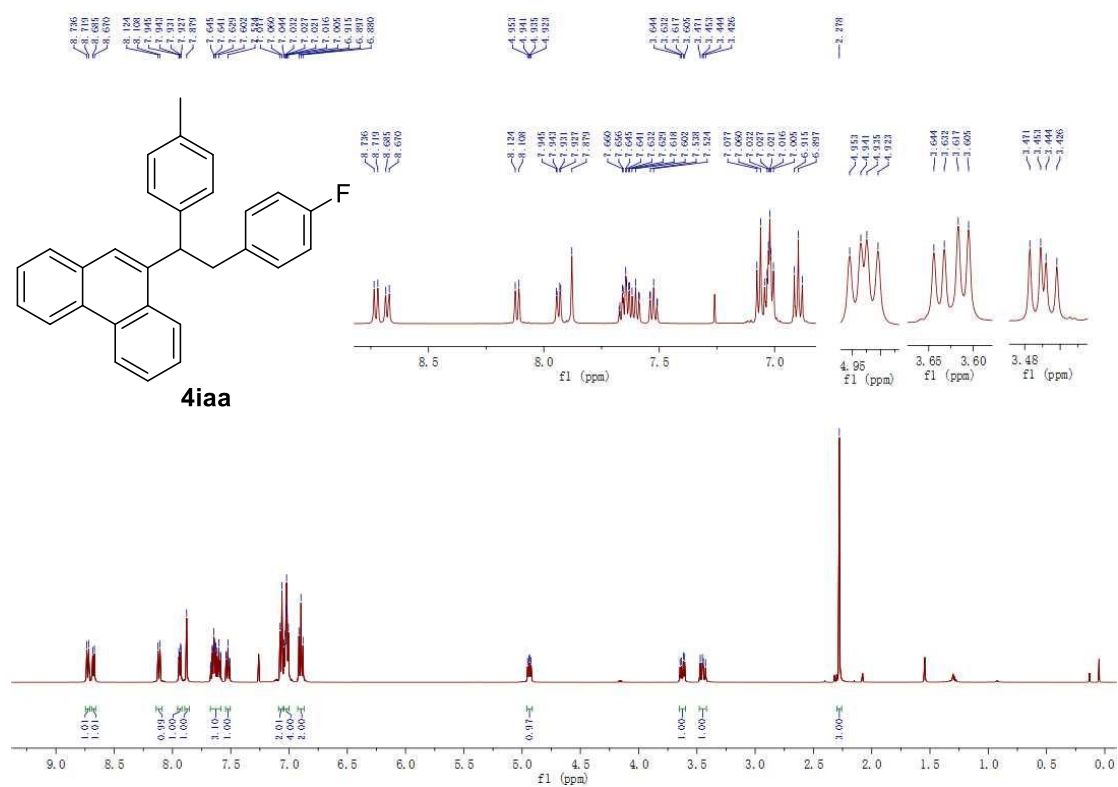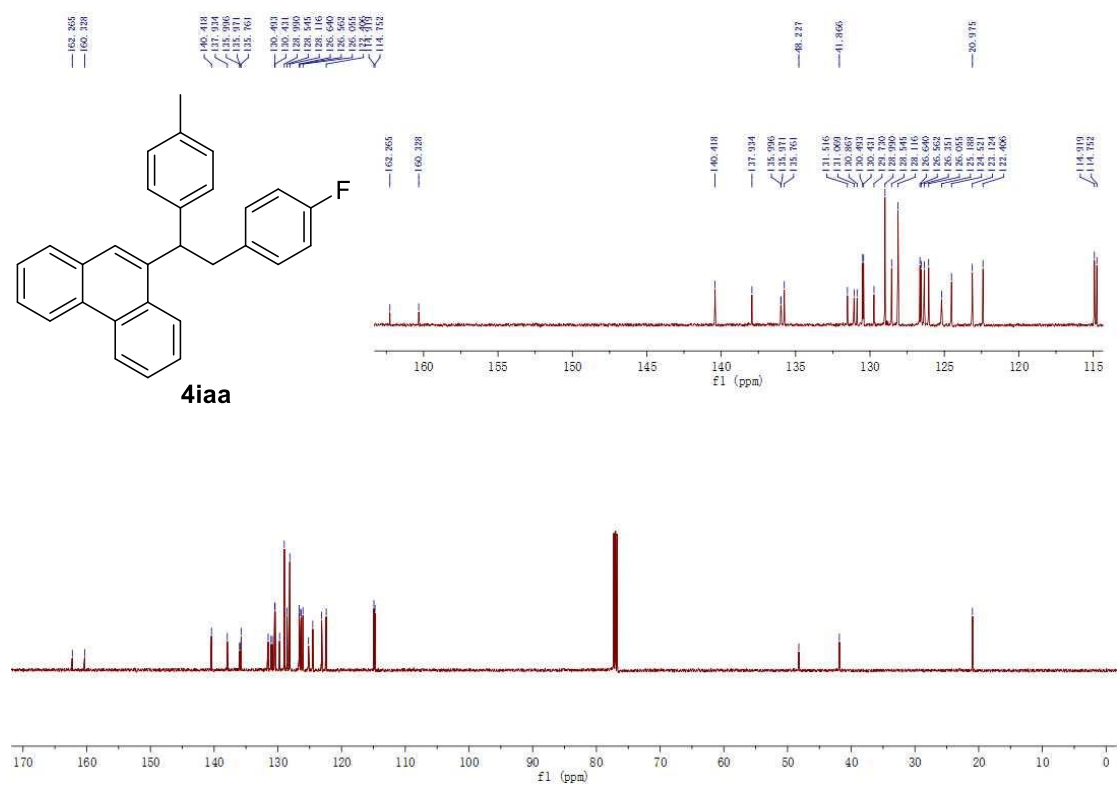



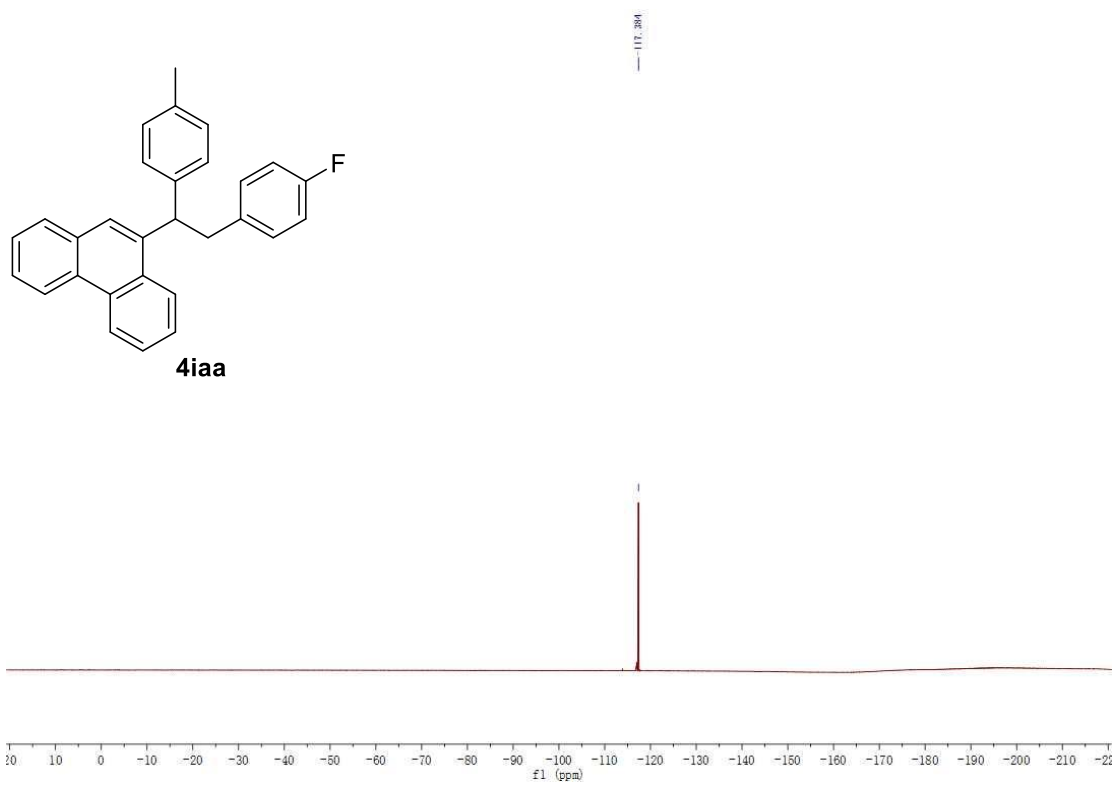



**4kaa**

Chemical structure of **4kaa** (2-(4-fluorophenyl)-2-(naphthalen-1-yl)propane) and its  $^1\text{H}$  NMR spectrum (CDCl<sub>3</sub>). The spectrum shows peaks corresponding to the structure, with integration values indicated above the peaks.

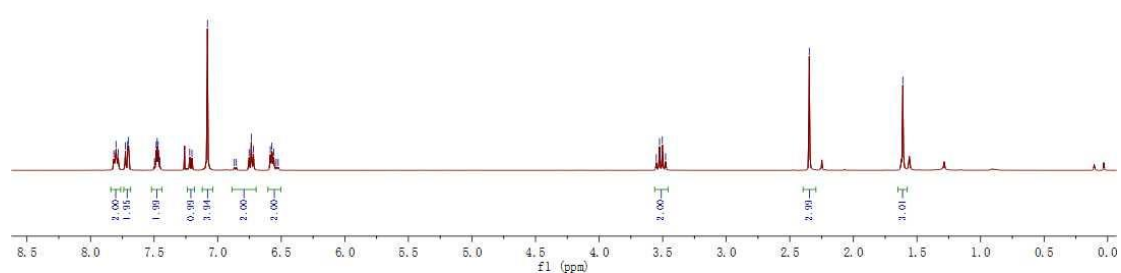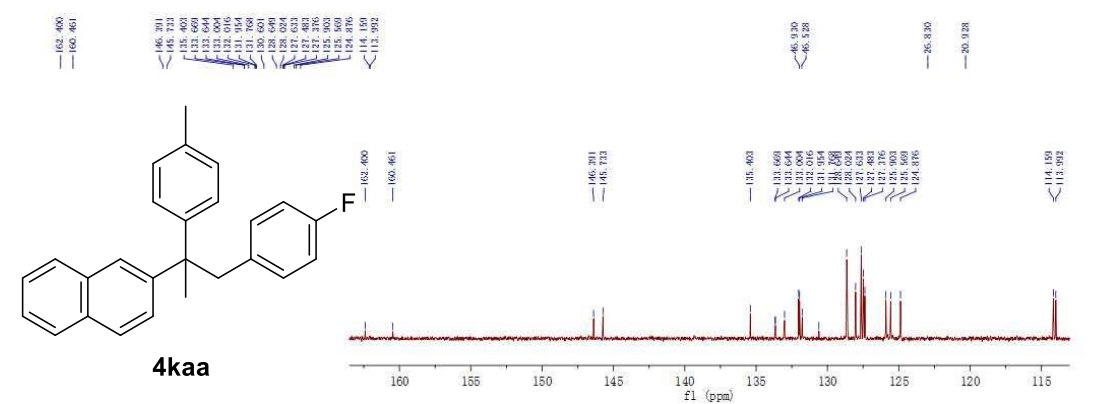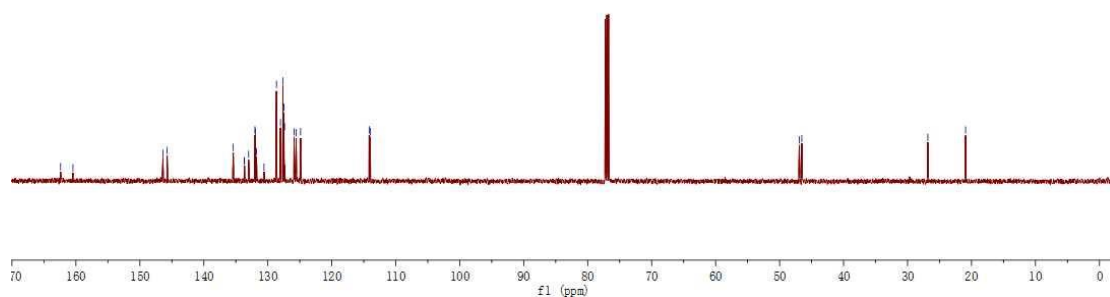



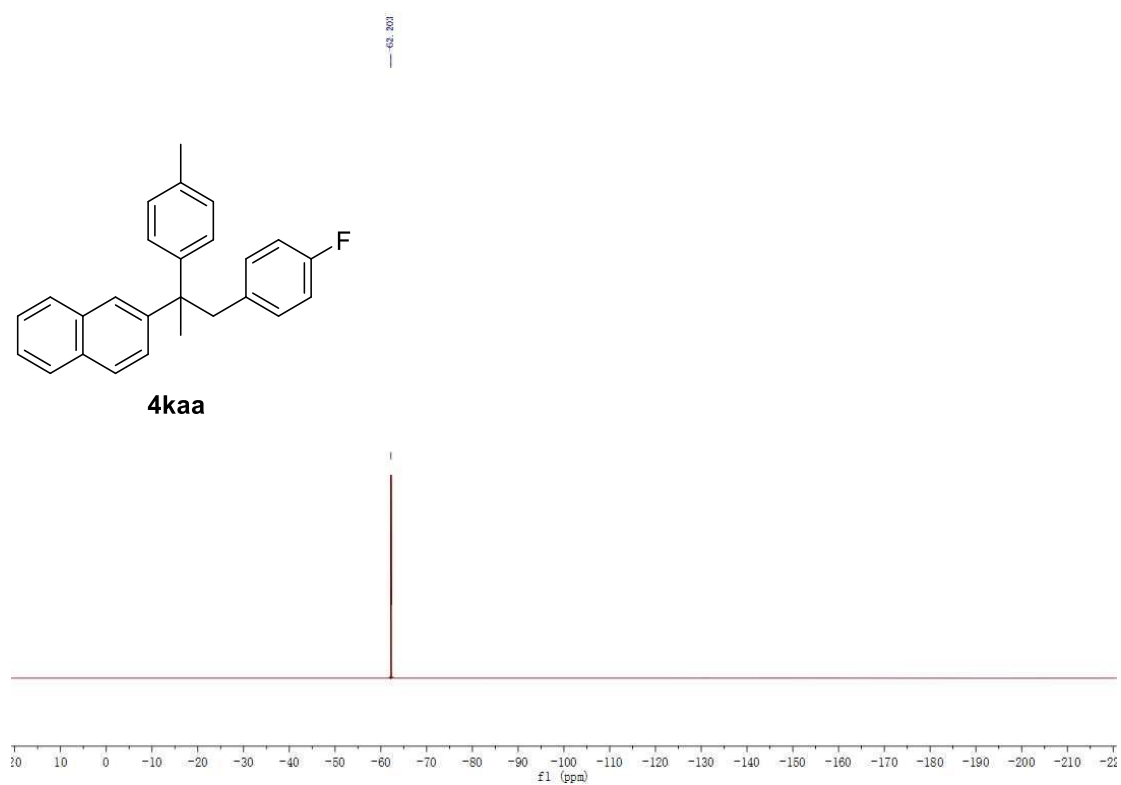



**2-(1-(*p*-tolyl)-2-(4-(trifluoromethyl)phenyl)propan-2-yl)naphthalene (4kbi)**

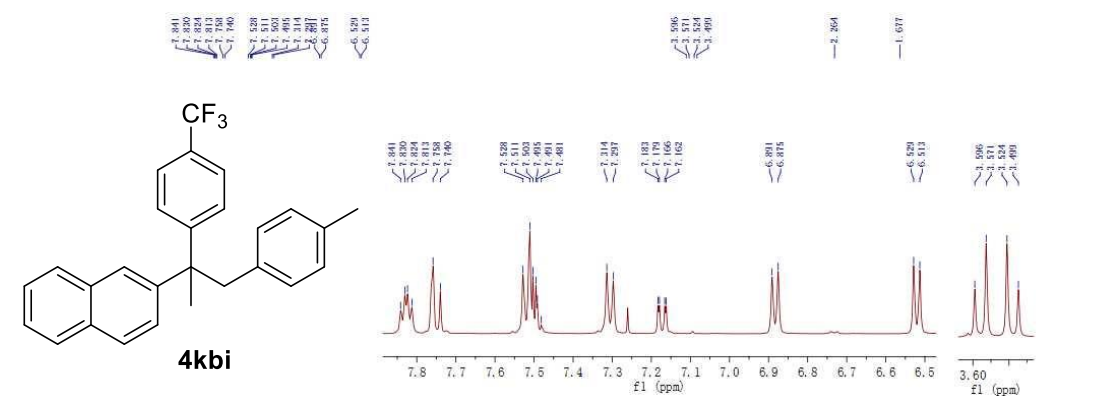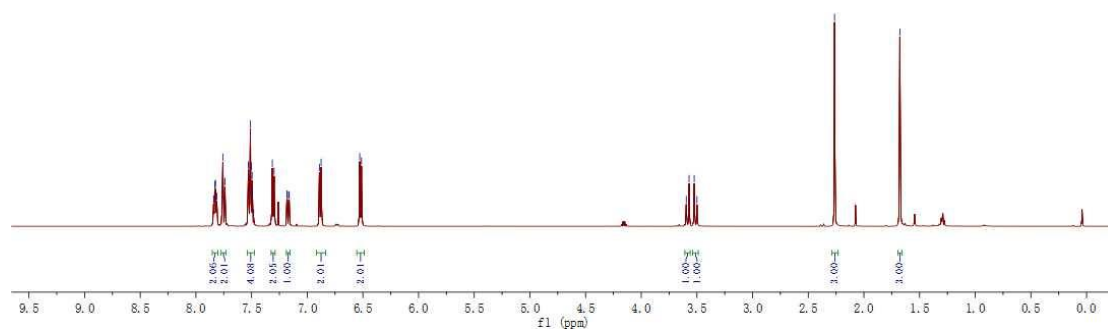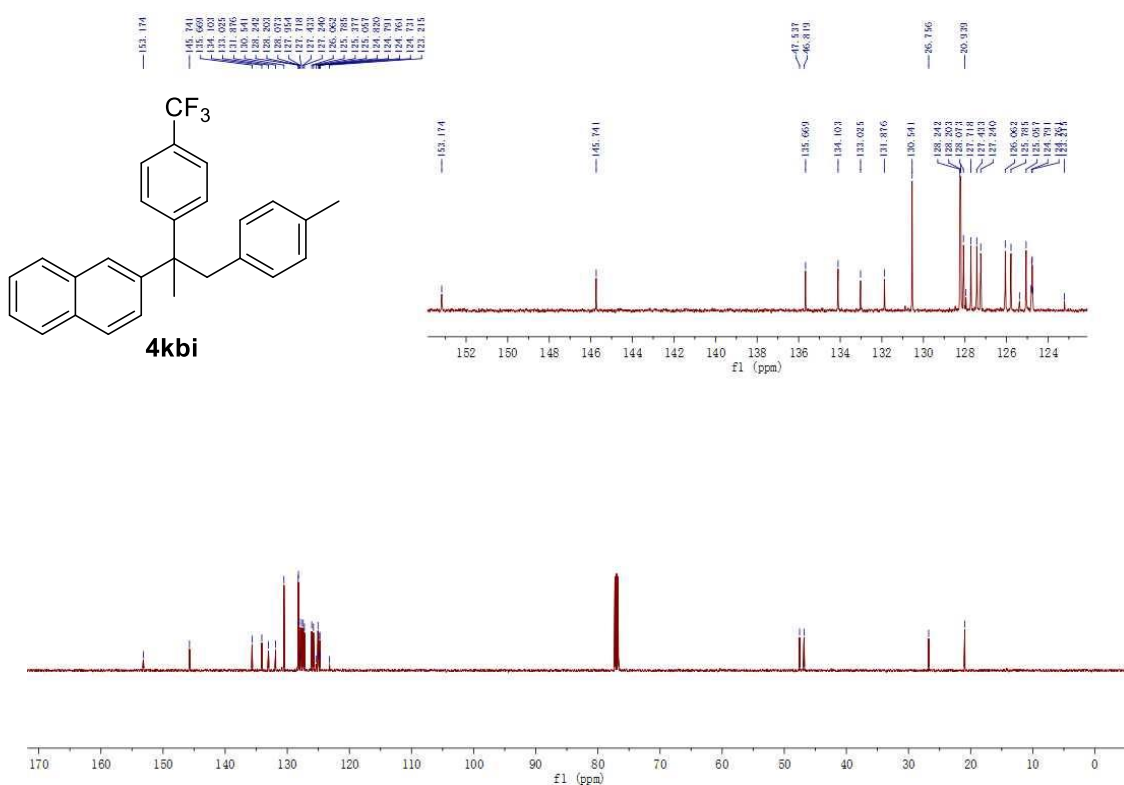



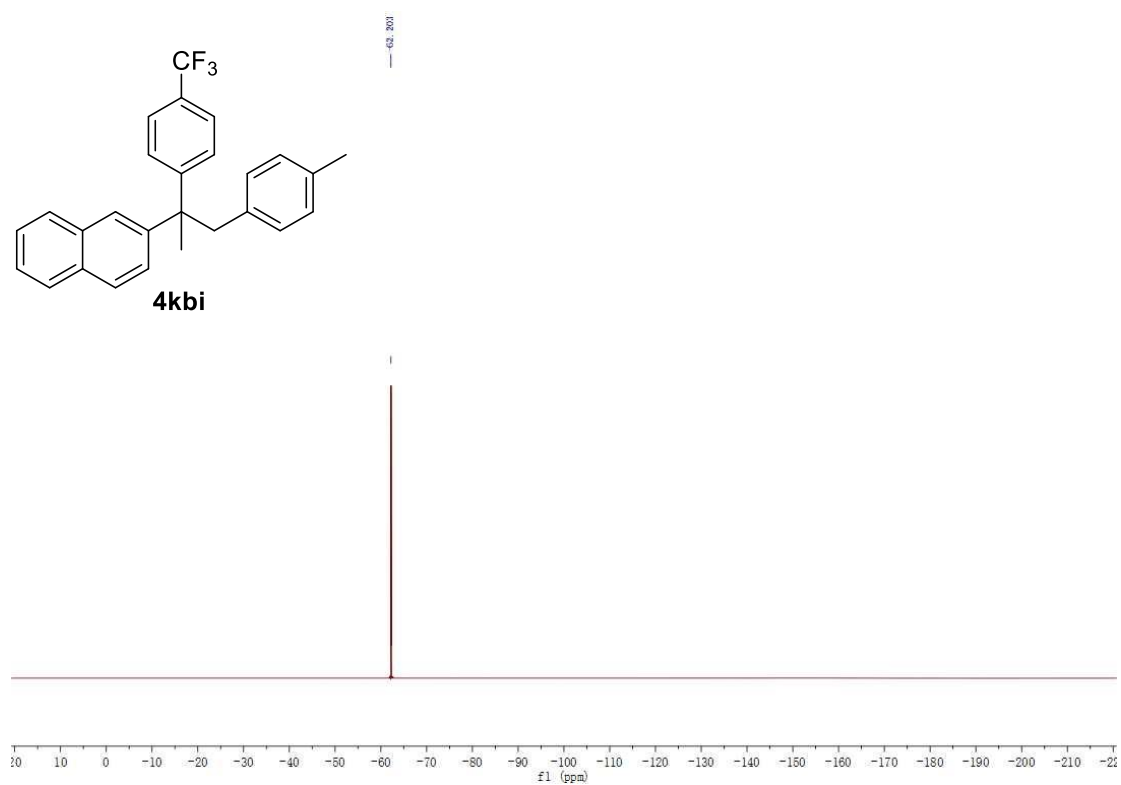



The chemical structure of compound **4kma** is shown, which is 2-(4-nitrobenzyl)-2-(4-methylphenyl)naphthalene. The structure consists of a naphthalene ring substituted at the 2-position with a quaternary carbon atom. This carbon is also bonded to a 4-methylphenyl group and a 4-nitrobenzyl group.

The <sup>1</sup>H NMR spectrum (CDCl<sub>3</sub>) is displayed below the structure. The spectrum shows several multiplets in the aromatic region (6.5-8.0 ppm) and two doublets in the aliphatic region (1.5 and 2.3 ppm). Integration values are provided for several peaks.

**Chemical Shifts (ppm):** 8.00, 7.996, 7.879, 7.880, 7.881, 7.882, 7.883, 7.884, 7.885, 7.886, 7.887, 7.888, 7.889, 7.890, 7.891, 7.892, 7.893, 7.894, 7.895, 7.896, 7.897, 7.898, 7.899, 7.900, 7.901, 7.902, 7.903, 7.904, 7.905, 7.906, 7.907, 7.908, 7.909, 7.910, 7.911, 7.912, 7.913, 7.914, 7.915, 7.916, 7.917, 7.918, 7.919, 7.920, 7.921, 7.922, 7.923, 7.924, 7.925, 7.926, 7.927, 7.928, 7.929, 7.930, 7.931, 7.932, 7.933, 7.934, 7.935, 7.936, 7.937, 7.938, 7.939, 7.940, 7.941, 7.942, 7.943, 7.944, 7.945, 7.946, 7.947, 7.948, 7.949, 7.950, 7.951, 7.952, 7.953, 7.954, 7.955, 7.956, 7.957, 7.958, 7.959, 7.960, 7.961, 7.962, 7.963, 7.964, 7.965, 7.966, 7.967, 7.968, 7.969, 7.970, 7.971, 7.972, 7.973, 7.974, 7.975, 7.976, 7.977, 7.978, 7.979, 7.980, 7.981, 7.982, 7.983, 7.984, 7.985, 7.986, 7.987, 7.988, 7.989, 7.990, 7.991, 7.992, 7.993, 7.994, 7.995, 7.996, 7.997, 7.998, 7.999, 8.000.

**Integration values:** 2.00, 1.04, 1.04, 1.00, 1.00, 2.00, 1.01, 1.01, 1.95.

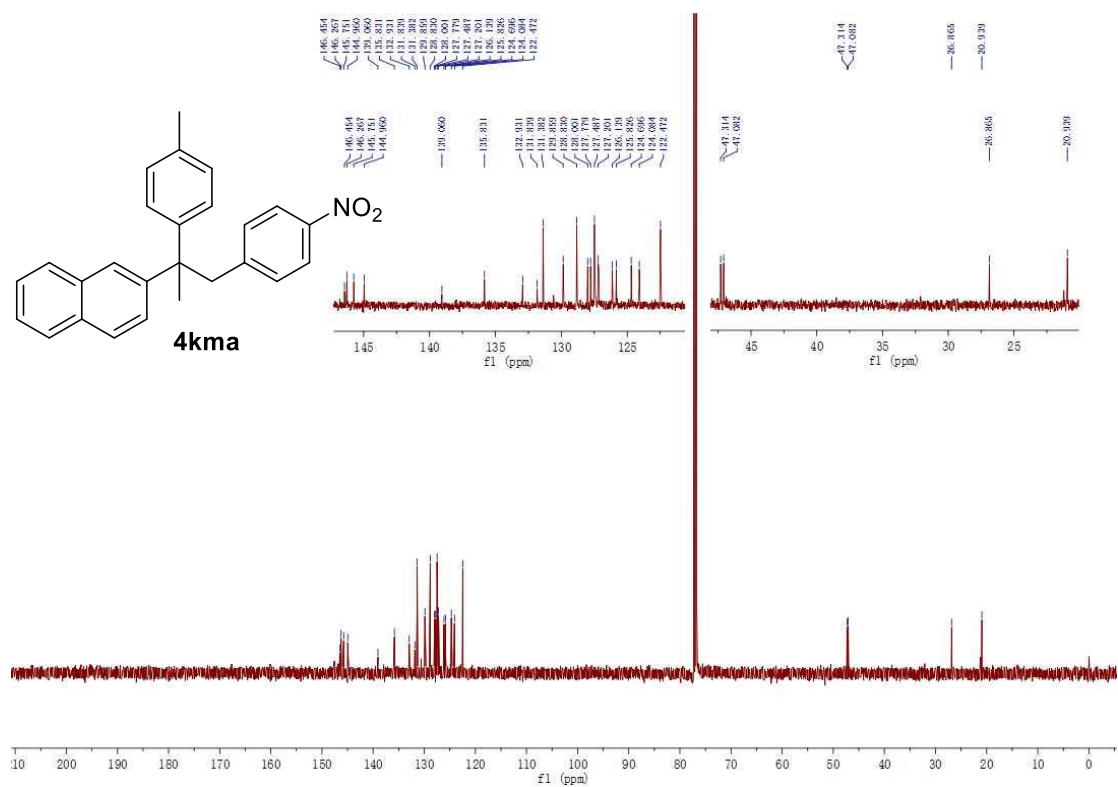



**4kfa**

The chemical structure of compound 4kfa is shown, which is 2-(4-chlorophenyl)-2-(4-methylphenyl)-1,2,3,4-tetrahydronaphthalene. The structure consists of a naphthalene ring system with a quaternary carbon at position 2, which is substituted with a 4-methylphenyl group and a 4-chlorophenyl group. The 1H NMR spectrum (CDCl3) is displayed below the structure, showing peaks in the aromatic region (7.0-7.9 ppm) and aliphatic region (2.3-3.6 ppm). The spectrum includes integration values and chemical shift labels in ppm.

<sup>1</sup>H NMR (CDCl<sub>3</sub>) peaks (ppm): 7.939, 7.932, 7.789, 7.782, 7.714, 7.698, 7.458, 7.455, 7.050, 7.044, 7.040, 6.544, 6.531, 6.526, 3.540, 3.535, 3.530, 3.461, 3.456, 3.451, 3.447, 3.214, 3.208, 3.201, 3.201, 3.184, 3.181, 3.181, 3.070, 3.064, 3.064, 3.017, 3.011, 3.005, 3.005, 3.008, 3.004, 6.548, 6.543, 6.538, 6.535, 3.540, 3.535, 3.530, 3.461.

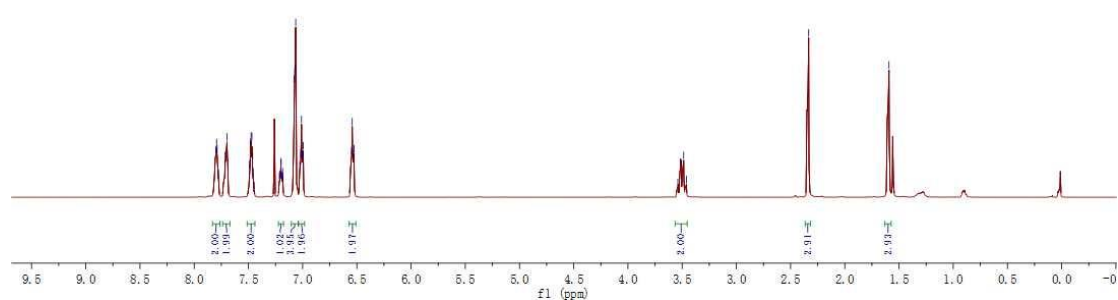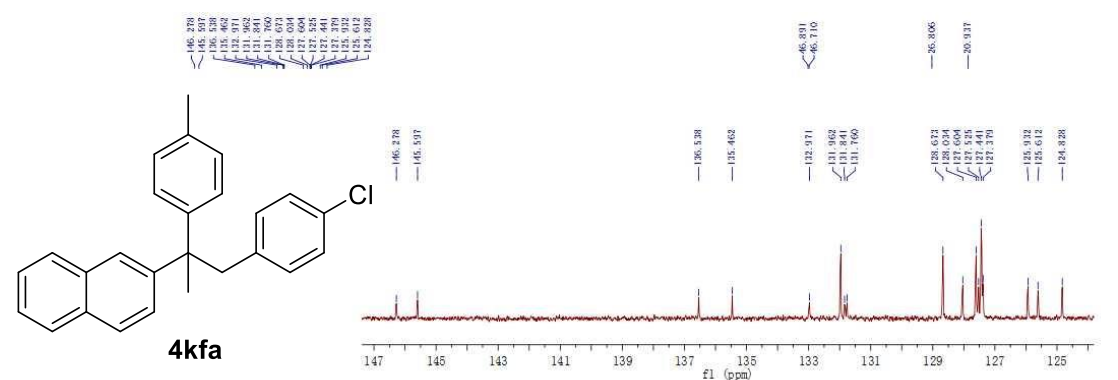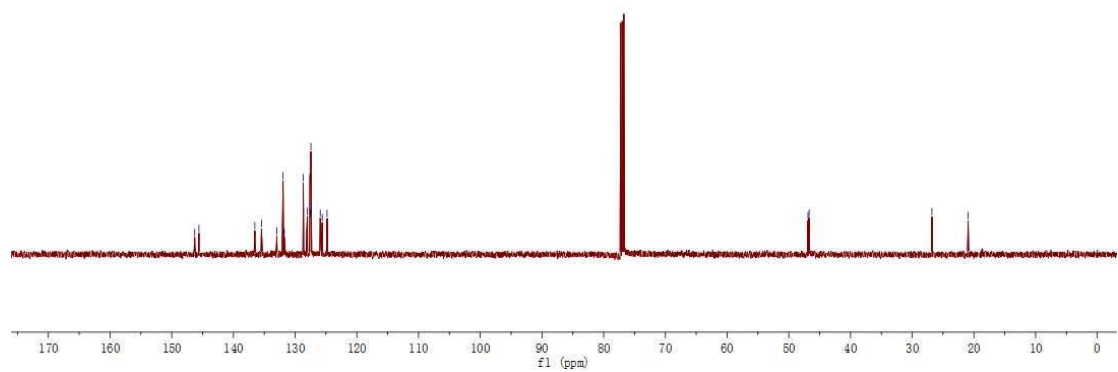



**2,2'-(2-(4-(trifluoromethyl)phenyl)propane-1,2-diyl)dinaphthalene (4koi)**

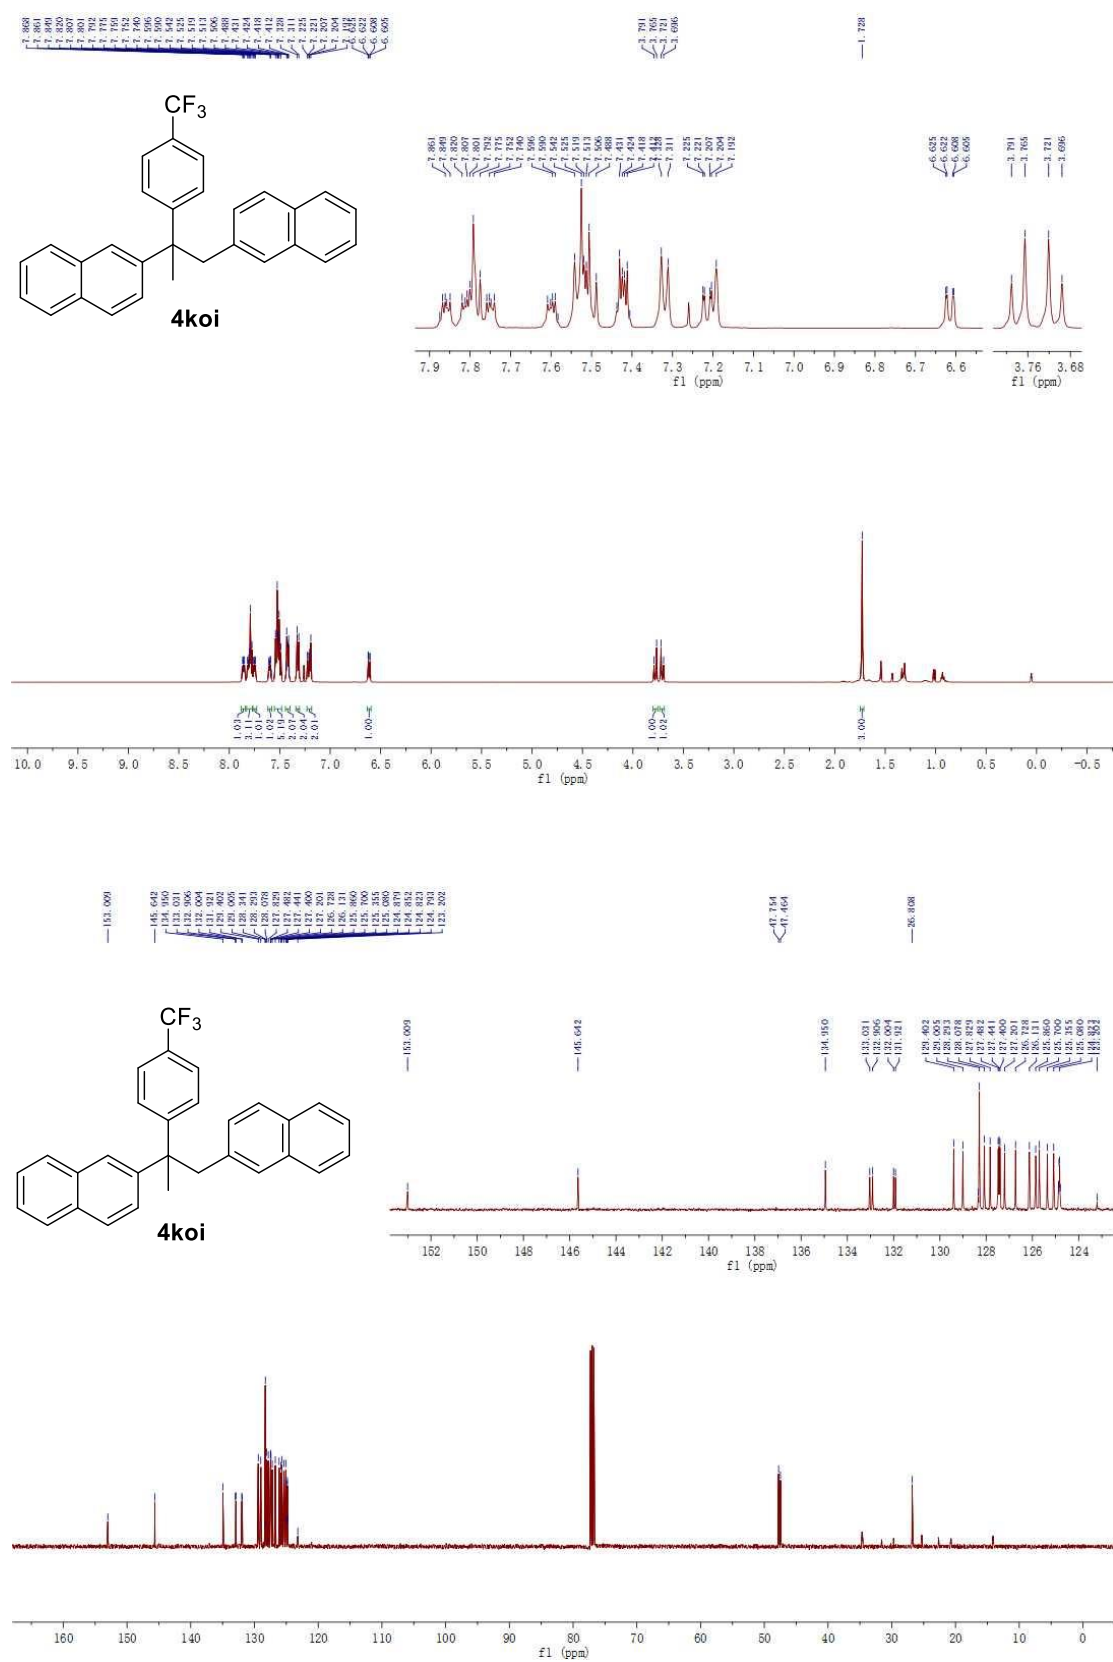



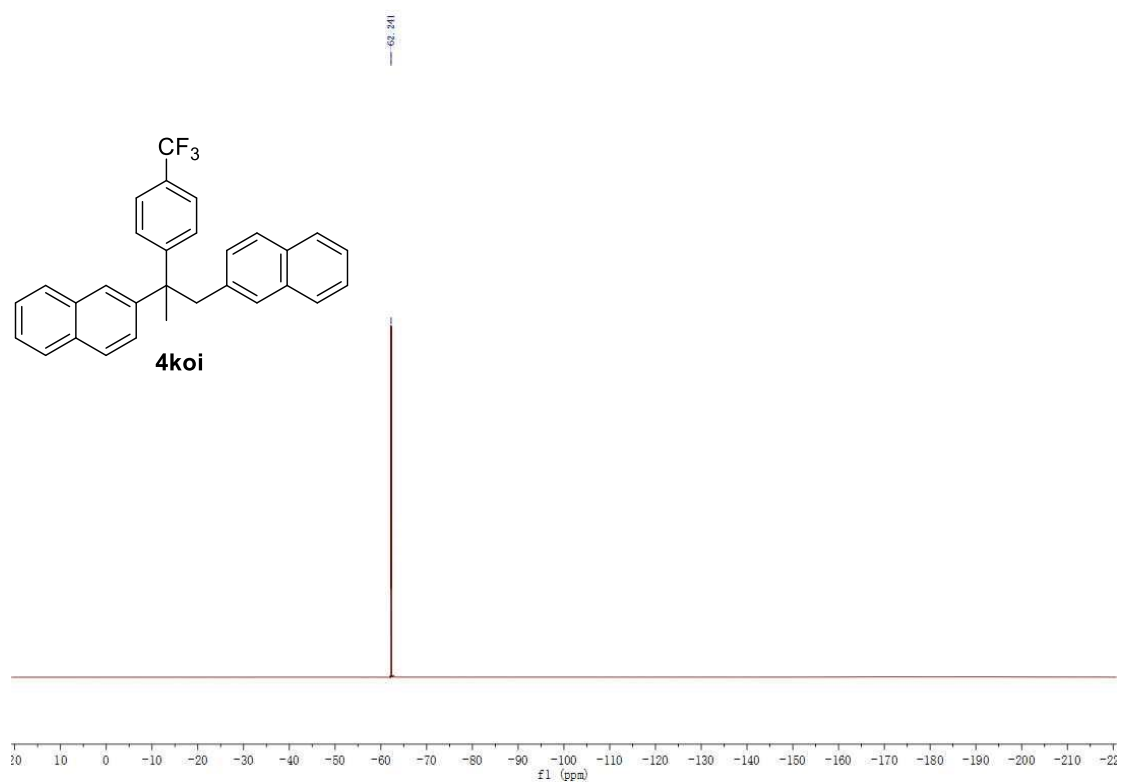



[illegible]



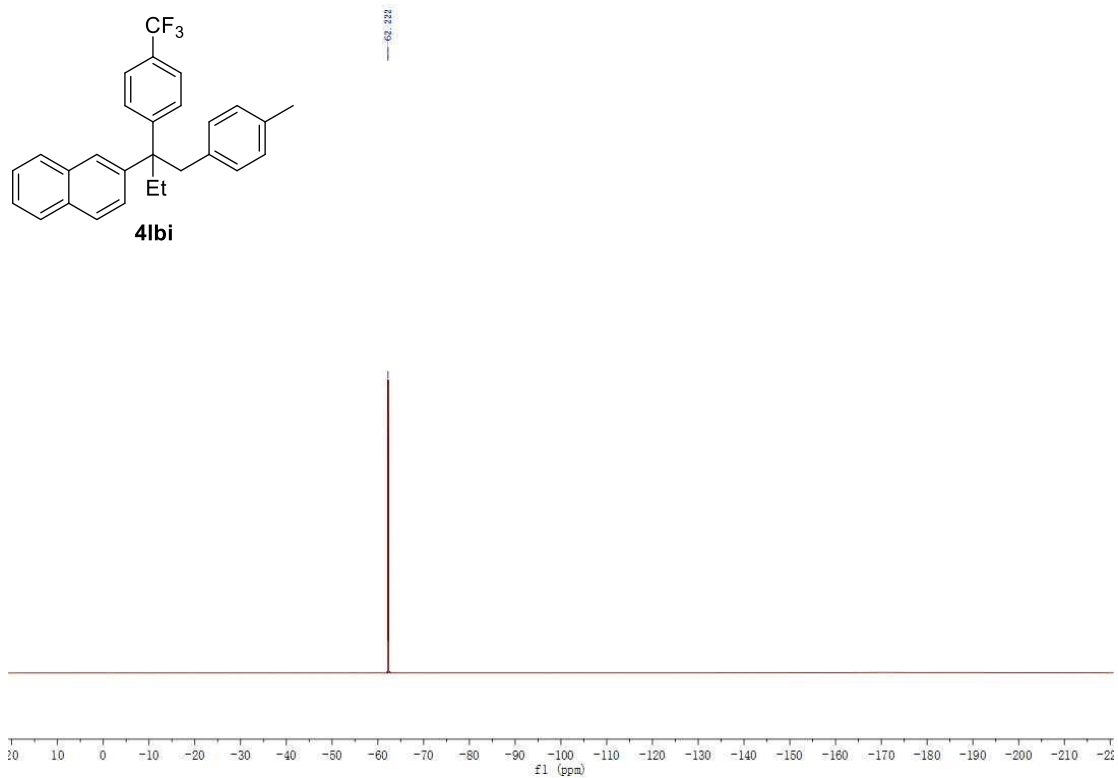



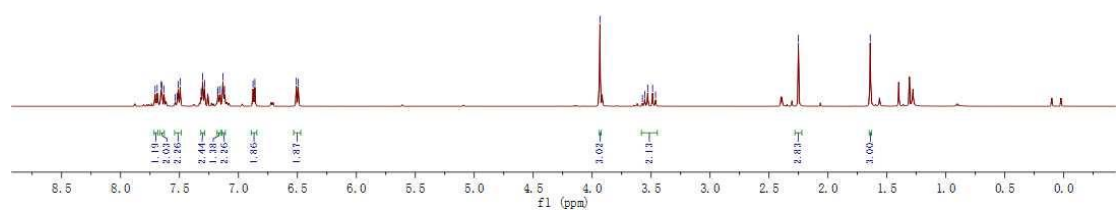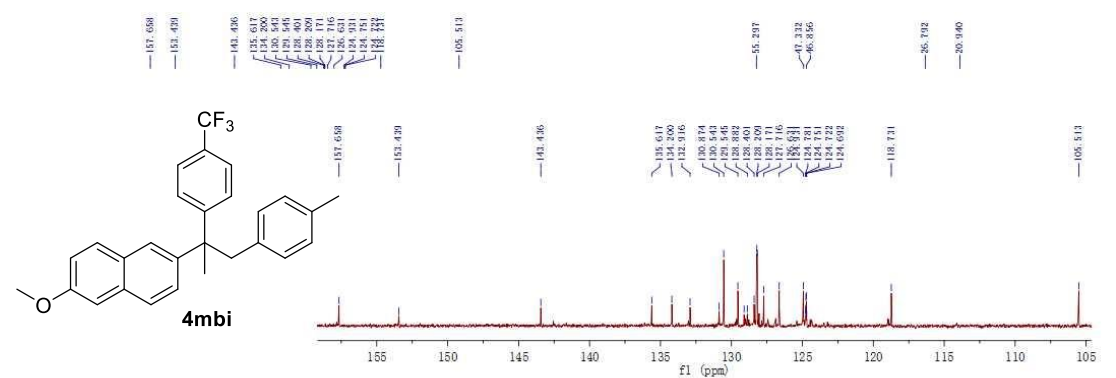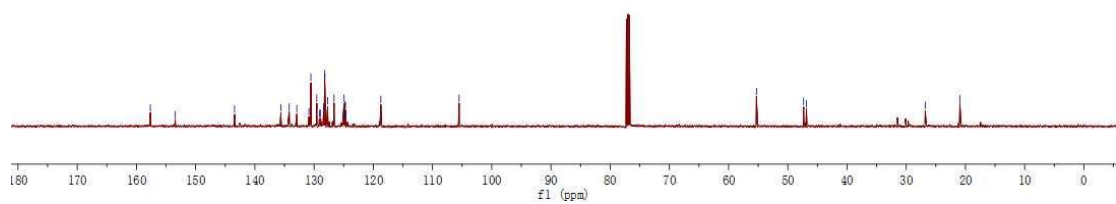



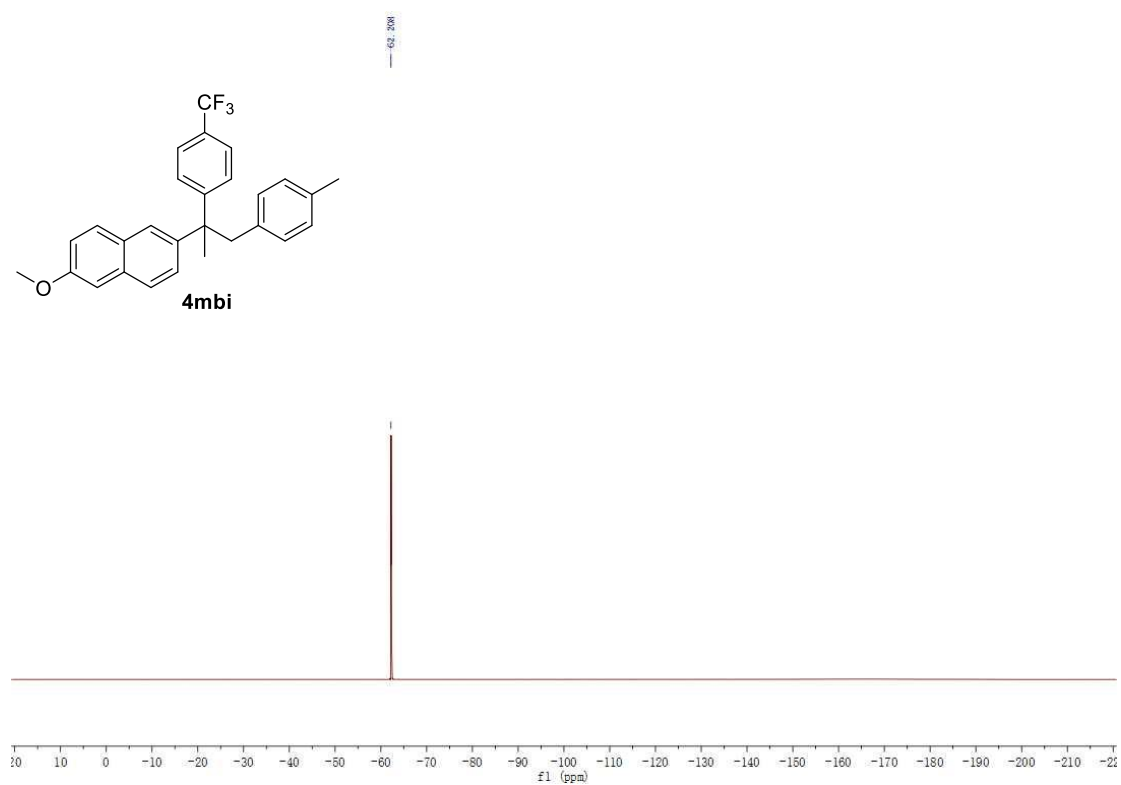



**2-(1-(*p*-tolyl)-2-(4-(trifluoromethyl)phenyl)propan-2-yl)benzo[*b*]thiophene (4nbi)**

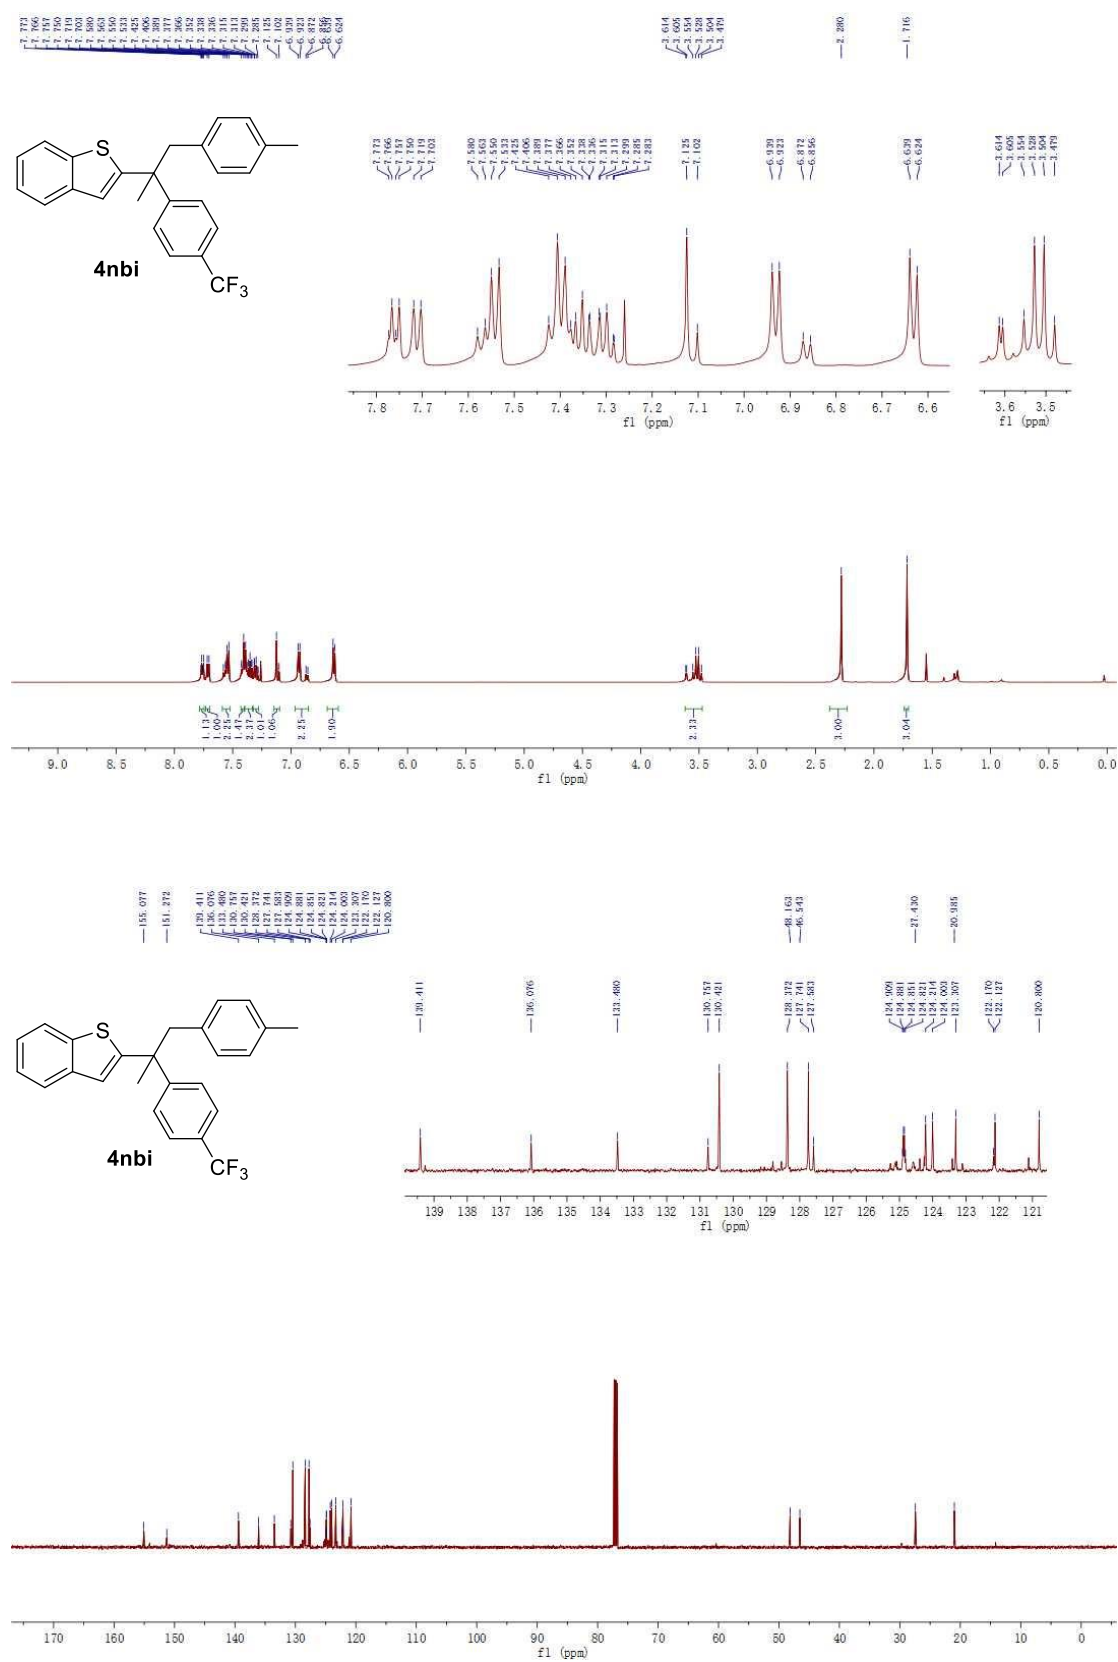



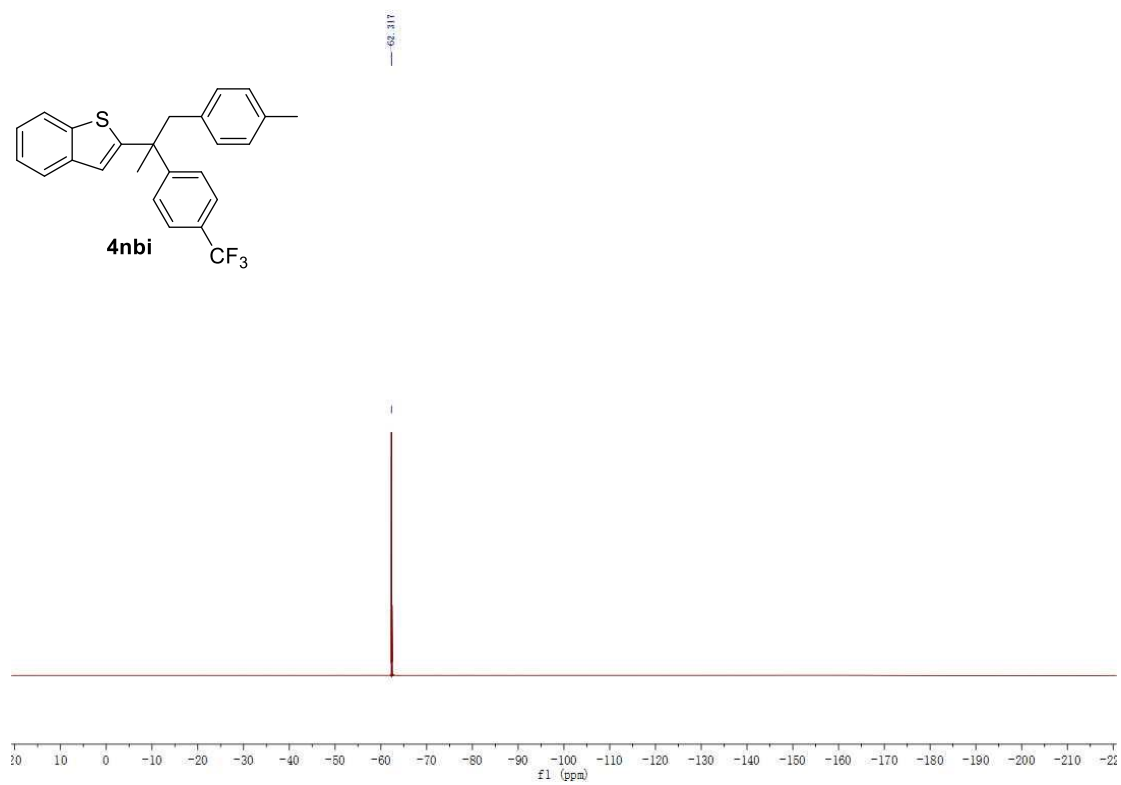



**4omb**

**mb**

**1H NMR Spectrum of 4omb (Top):**

- Chemical structure: CC(C)(C)c1ccc(cc1)C(c2ccc(OC)cc2)Cc3ccc([N+](=O)[O-])cc3
- Peak list (ppm): 8.27, 8.271, 8.264, 8.260, 8.037, 8.010, 7.706, 7.701, 7.691, 7.683, 7.593, 7.588, 7.580, 7.576, 7.296, 7.279, 7.142, 7.137, 7.120, 7.082, 7.083, 7.073, 7.019, 6.942, 6.775, 4.162, 4.146, 4.130, 3.460, 3.446, 3.433, 3.410, 3.394, 3.384, 3.366.
- Integration values: 1.00, 6.23, 3.01, 2.00, 9.09.

**1H NMR Spectrum of mb (Bottom):**

- Chemical structure: COc1ccc(cc1)-c2ccc([N+](=O)[O-])cc2
- Peak list (ppm): 8.40, 8.398, 8.396, 8.394, 8.392, 8.390, 8.388, 8.386, 8.384, 8.382, 8.380, 8.378, 8.376, 8.374, 8.372, 8.370, 8.368, 8.366, 8.364, 8.362, 8.360, 8.358, 8.356, 8.354, 8.352, 8.350, 8.348, 8.346, 8.344, 8.342, 8.340, 8.338, 8.336, 8.334, 8.332, 8.330, 8.328, 8.326, 8.324, 8.322, 8.320, 8.318, 8.316, 8.314, 8.312, 8.310, 8.308, 8.306, 8.304, 8.302, 8.300, 8.298, 8.296, 8.294, 8.292, 8.290, 8.288, 8.286, 8.284, 8.282, 8.280, 8.278, 8.276, 8.274, 8.272, 8.270, 8.268, 8.266, 8.264, 8.262, 8.260, 8.258, 8.256, 8.254, 8.252, 8.250, 8.248, 8.246, 8.244, 8.242, 8.240, 8.238, 8.236, 8.234, 8.232, 8.230, 8.228, 8.226, 8.224, 8.222, 8.220, 8.218, 8.216, 8.214, 8.212, 8.210, 8.208, 8.206, 8.204, 8.202, 8.200, 8.198, 8.196, 8.194, 8.192, 8.190, 8.188, 8.186, 8.184, 8.182, 8.180, 8.178, 8.176, 8.174, 8.172, 8.170, 8.168, 8.166, 8.164, 8.162, 8.160, 8.158, 8.156, 8.154, 8.152, 8.150, 8.148, 8.146, 8.144, 8.142, 8.140, 8.138, 8.136, 8.134, 8.132, 8.130, 8.128, 8.126, 8.124, 8.122, 8.120, 8.118, 8.116, 8.114, 8.112, 8.110, 8.108, 8.106, 8.104, 8.102, 8.100, 8.098, 8.096, 8.094, 8.092, 8.090, 8.088, 8.086, 8.084, 8.082, 8.080, 8.078, 8.076, 8.074, 8.072, 8.070, 8.068, 8.066, 8.064, 8.062, 8.060, 8.058, 8.056, 8.054, 8.052, 8.050, 8.048, 8.046, 8.044, 8.042, 8.040, 8.038, 8.036, 8.034, 8.032, 8.030, 8.028, 8.026, 8.024, 8.022, 8.020, 8.018, 8.016, 8.014, 8.012, 8.010, 8.008, 8.006, 8.004, 8.002, 8.000, 7.998, 7.996, 7.994, 7.992, 7.990, 7.988, 7.986, 7.984, 7.982, 7.980, 7.978, 7.976, 7.974, 7.972, 7.970, 7.968, 7.966, 7.964, 7.962, 7.960, 7.958, 7.956, 7.954, 7.952, 7.950, 7.948, 7.946, 7.944, 7.942, 7.940, 7.938, 7.936, 7.934, 7.932, 7.930, 7.928, 7.926, 7.924, 7.922, 7.920, 7.918, 7.916, 7.914, 7.912, 7.910, 7.908, 7.906, 7.904, 7.902, 7.900, 7.898, 7.896, 7.894, 7.892, 7.890, 7.888, 7.886, 7.884, 7.882, 7.880, 7.878, 7.876, 7.874, 7.872, 7.870, 7.868, 7.866, 7.864, 7.862, 7.860, 7.858, 7.856, 7.854, 7.852, 7.850, 7.848, 7.846, 7.844, 7.842, 7.840, 7.838, 7.836, 7.834, 7.832, 7.830, 7.828, 7.826, 7.824, 7.822, 7.820, 7.818, 7.816, 7.814, 7.812, 7.810, 7.808, 7.806, 7.804, 7.802, 7.800, 7.798, 7.796, 7.794, 7.792, 7.790, 7.788, 7.786, 7.784, 7.782, 7.780, 7.778, 7.776, 7.774, 7.772, 7.770, 7.768, 7.766, 7.764, 7.762, 7.760, 7.758, 7.756, 7.754, 7.752, 7.750, 7.748, 7.746, 7.744, 7.742, 7.740, 7.738, 7.736, 7.734, 7.732, 7.730, 7.728, 7.726, 7.724, 7.722, 7.720, 7.718, 7.716, 7.714, 7.712, 7.710, 7.708, 7.706, 7.704, 7.702, 7.700, 7.698, 7.696, 7.694, 7.692, 7.690, 7.688, 7.686, 7.684, 7.682, 7.680, 7.678, 7.676, 7.674, 7.672, 7.670, 7.668, 7.666, 7.664, 7.662, 7.660, 7.658, 7.656, 7.654, 7.652, 7.650, 7.648, 7.646, 7.644, 7.642, 7.640, 7.638, 7.636, 7.634, 7.632, 7.630, 7.628, 7.626, 7.624, 7.622, 7.620, 7.618, 7.616, 7.614, 7.612, 7.610, 7.608, 7.606, 7.604, 7.602, 7.600, 7.598, 7.596, 7.594, 7.592, 7.590, 7.588, 7.586, 7.584, 7.582, 7.580, 7.578, 7.576, 7.574, 7.572, 7.570, 7.568, 7.566, 7.564, 7.562, 7.560, 7.558, 7.556, 7.554, 7.552, 7.550, 7.548, 7.546, 7.544, 7.542, 7.540, 7.538, 7.536, 7.534, 7.532, 7.530, 7.528, 7.526, 7.524, 7.522, 7.520, 7.518, 7.516, 7.514, 7.512, 7.510, 7.508, 7.506, 7.504, 7.502, 7.500, 7.498, 7.496, 7.494, 7.492, 7.490, 7.488, 7.486, 7.484, 7.482, 7.480, 7.478, 7.476, 7.474, 7.472, 7.470, 7.468, 7.466, 7.464, 7.462, 7.460, 7.458, 7.456, 7.454, 7.452, 7.450, 7.448, 7.446, 7.444, 7.442, 7.440, 7.438, 7.436, 7.434, 7.432, 7.430, 7.428, 7.426, 7.424, 7.422, 7.420, 7.418, 7.416, 7.414, 7.412, 7.410, 7.408, 7.406, 7.404, 7.402, 7.400, 7.398, 7.396, 7.394, 7.392, 7.390, 7.388, 7.386,

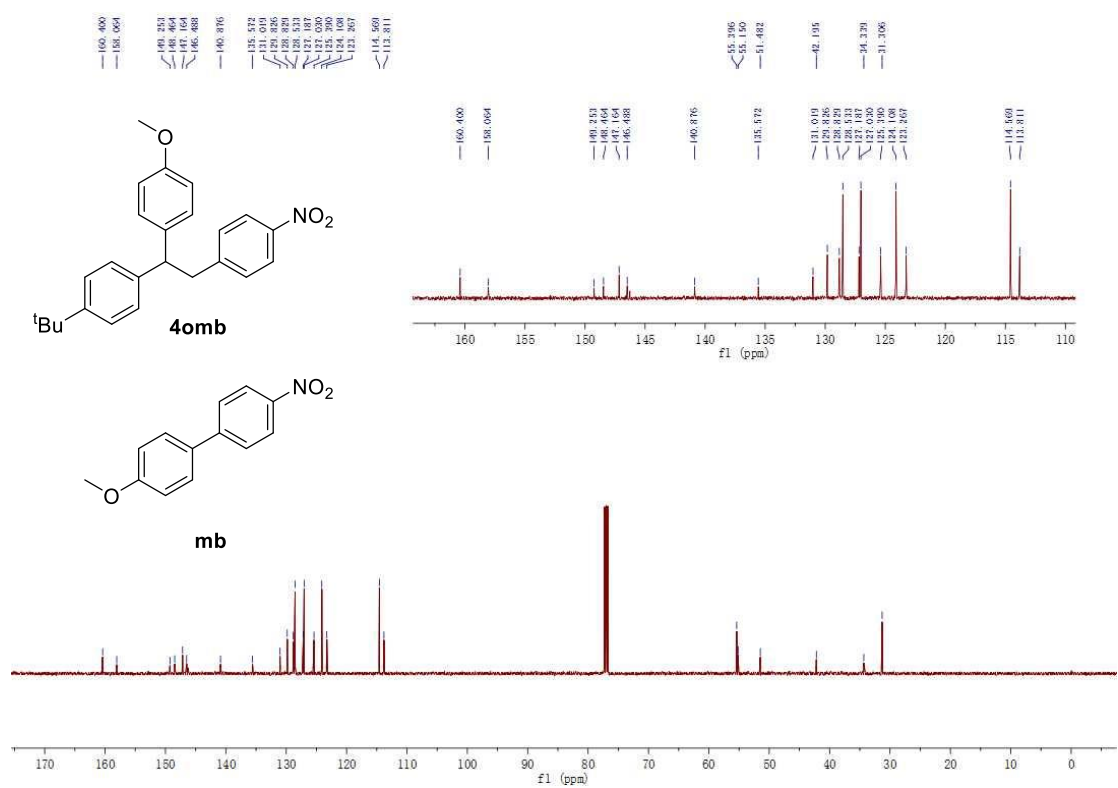



## 2-(vinyl-2,2- $d_2$ )naphthalene (1a- $D_2$ )

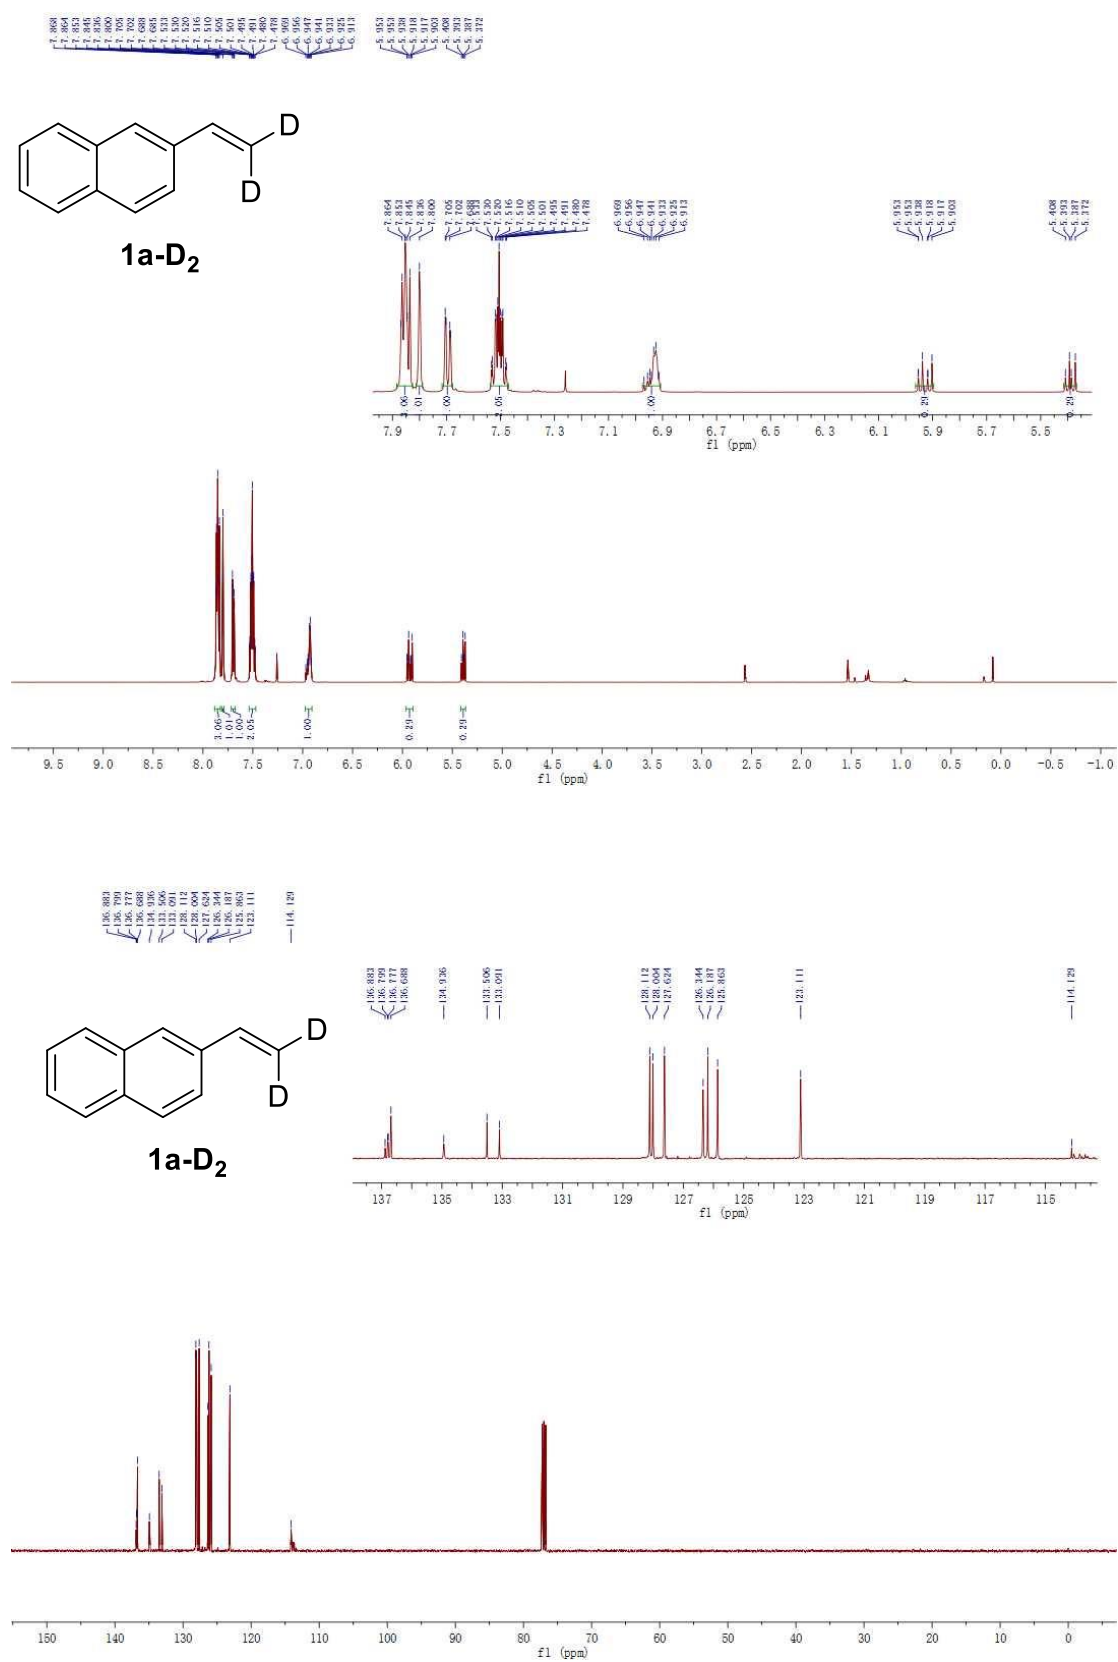



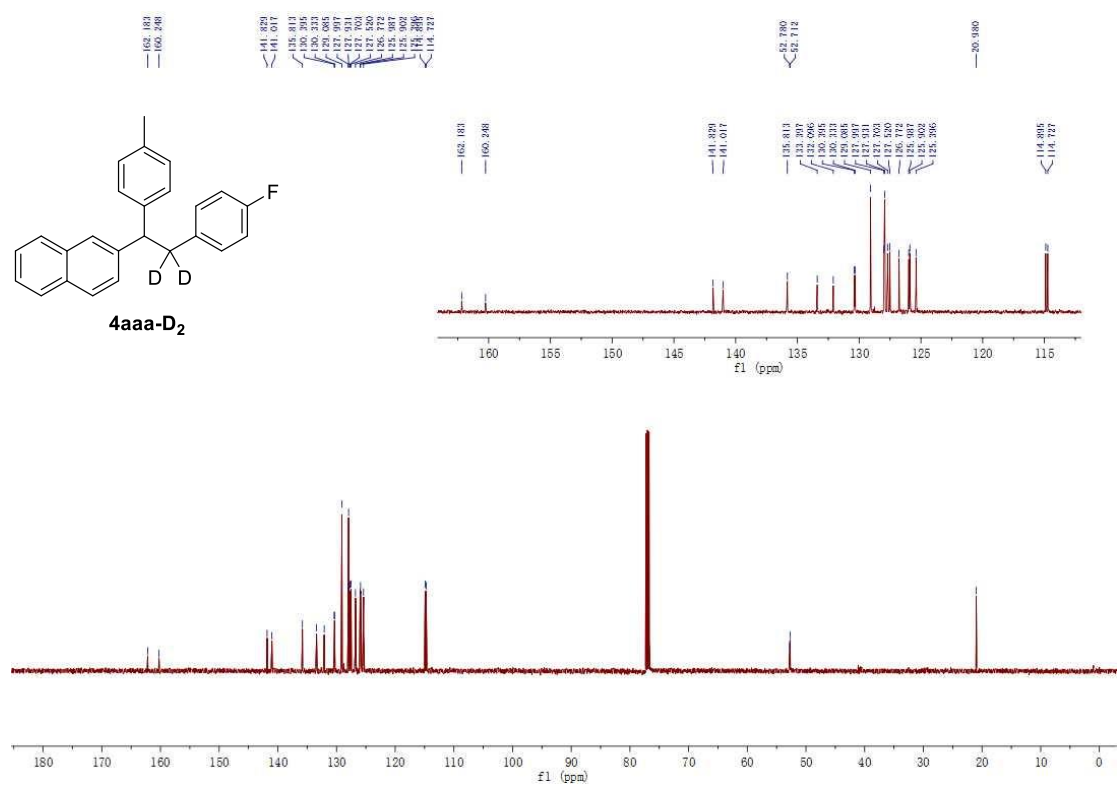



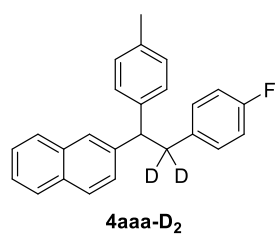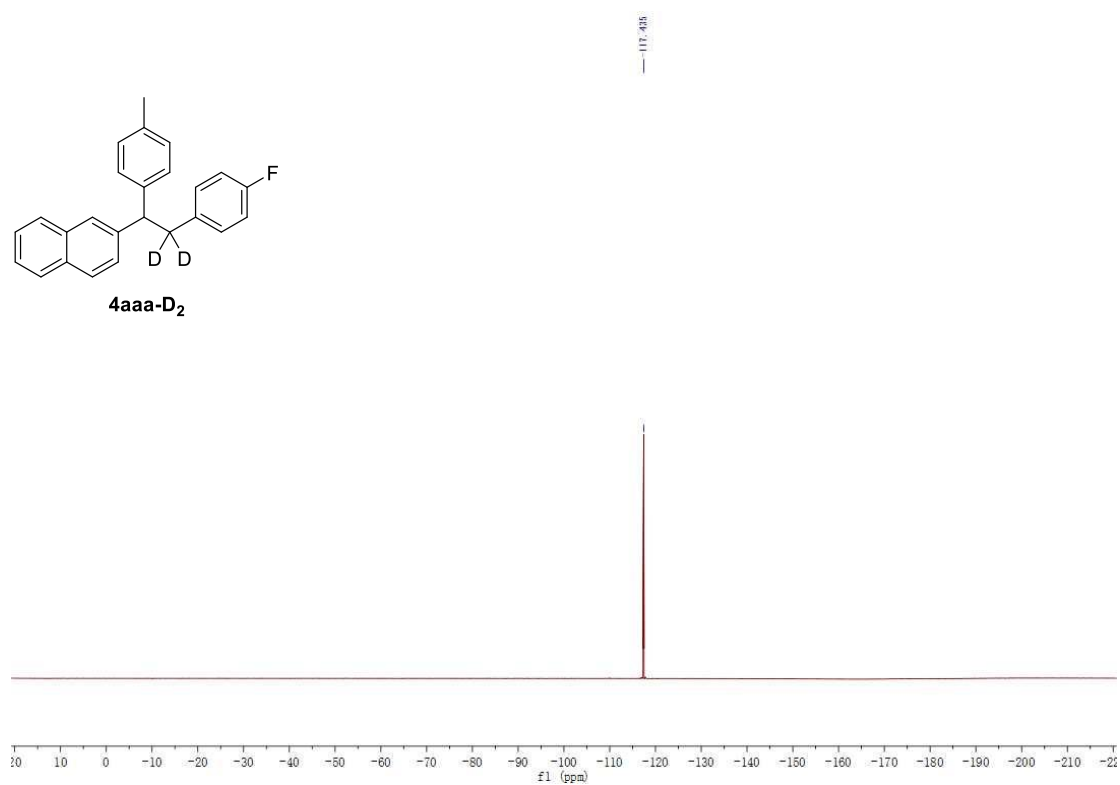



**(E)-2-(4-fluorostyryl)naphthalene (5)**

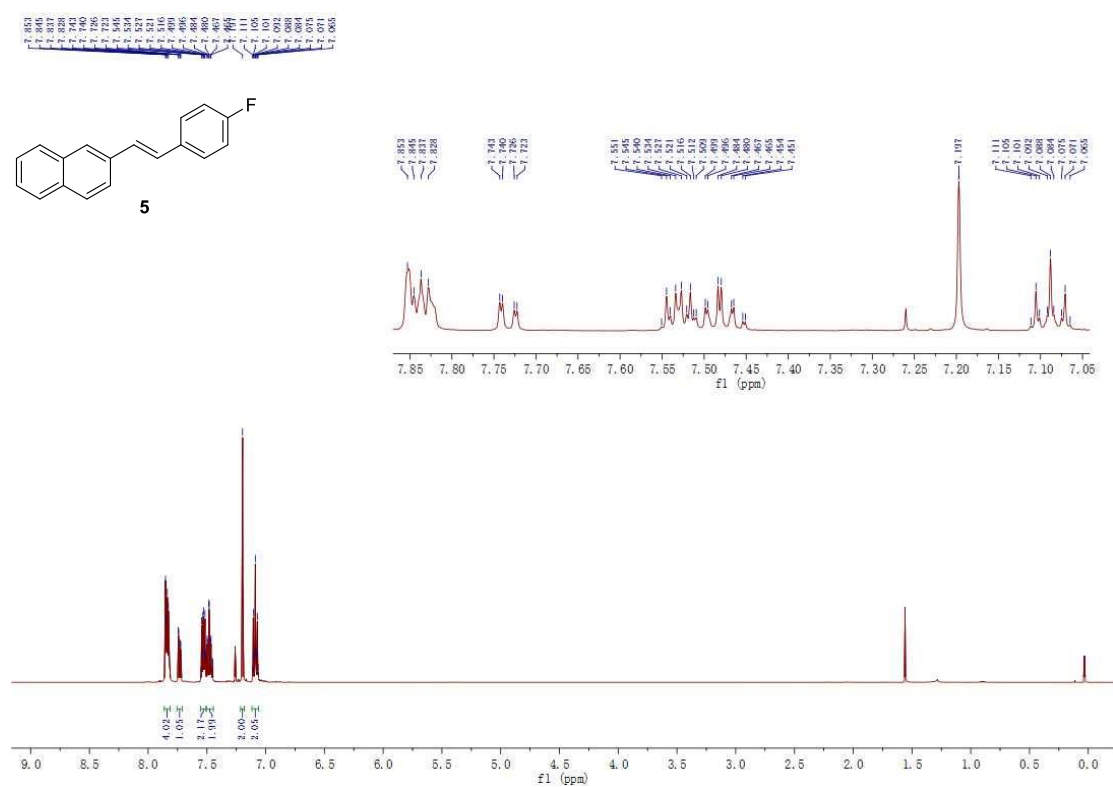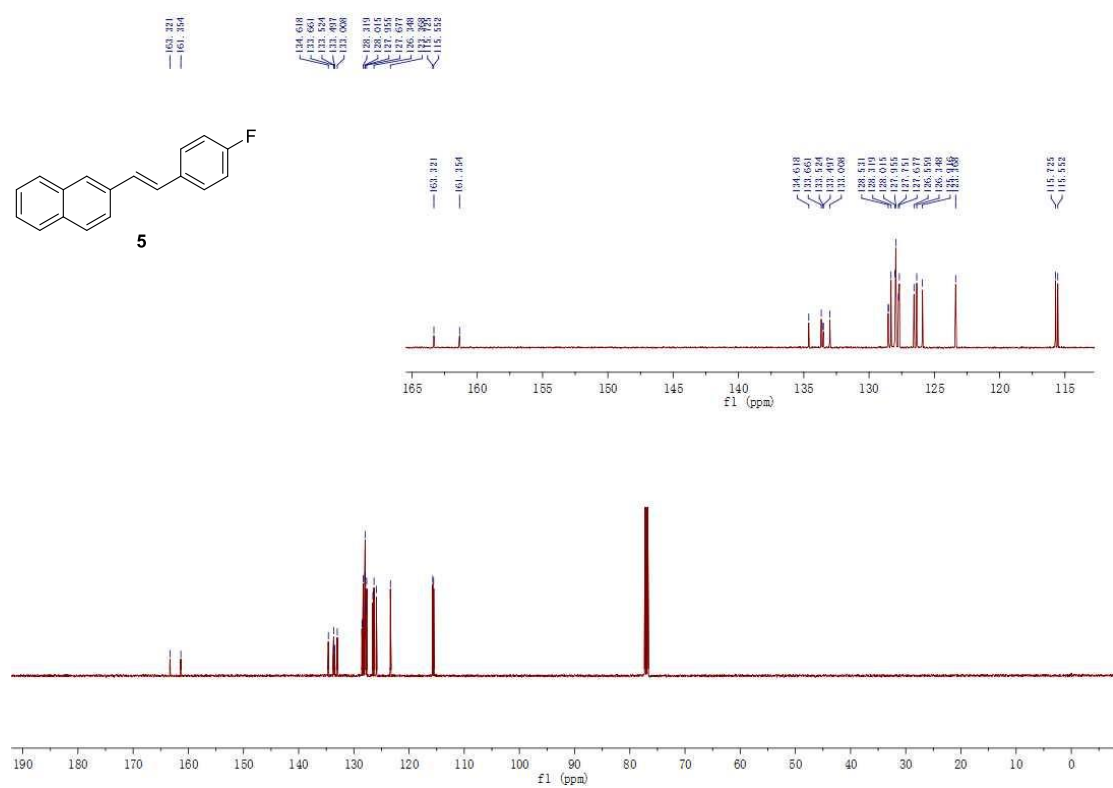



## 2-(1-(4-chlorophenyl)ethyl)naphthalene (6)

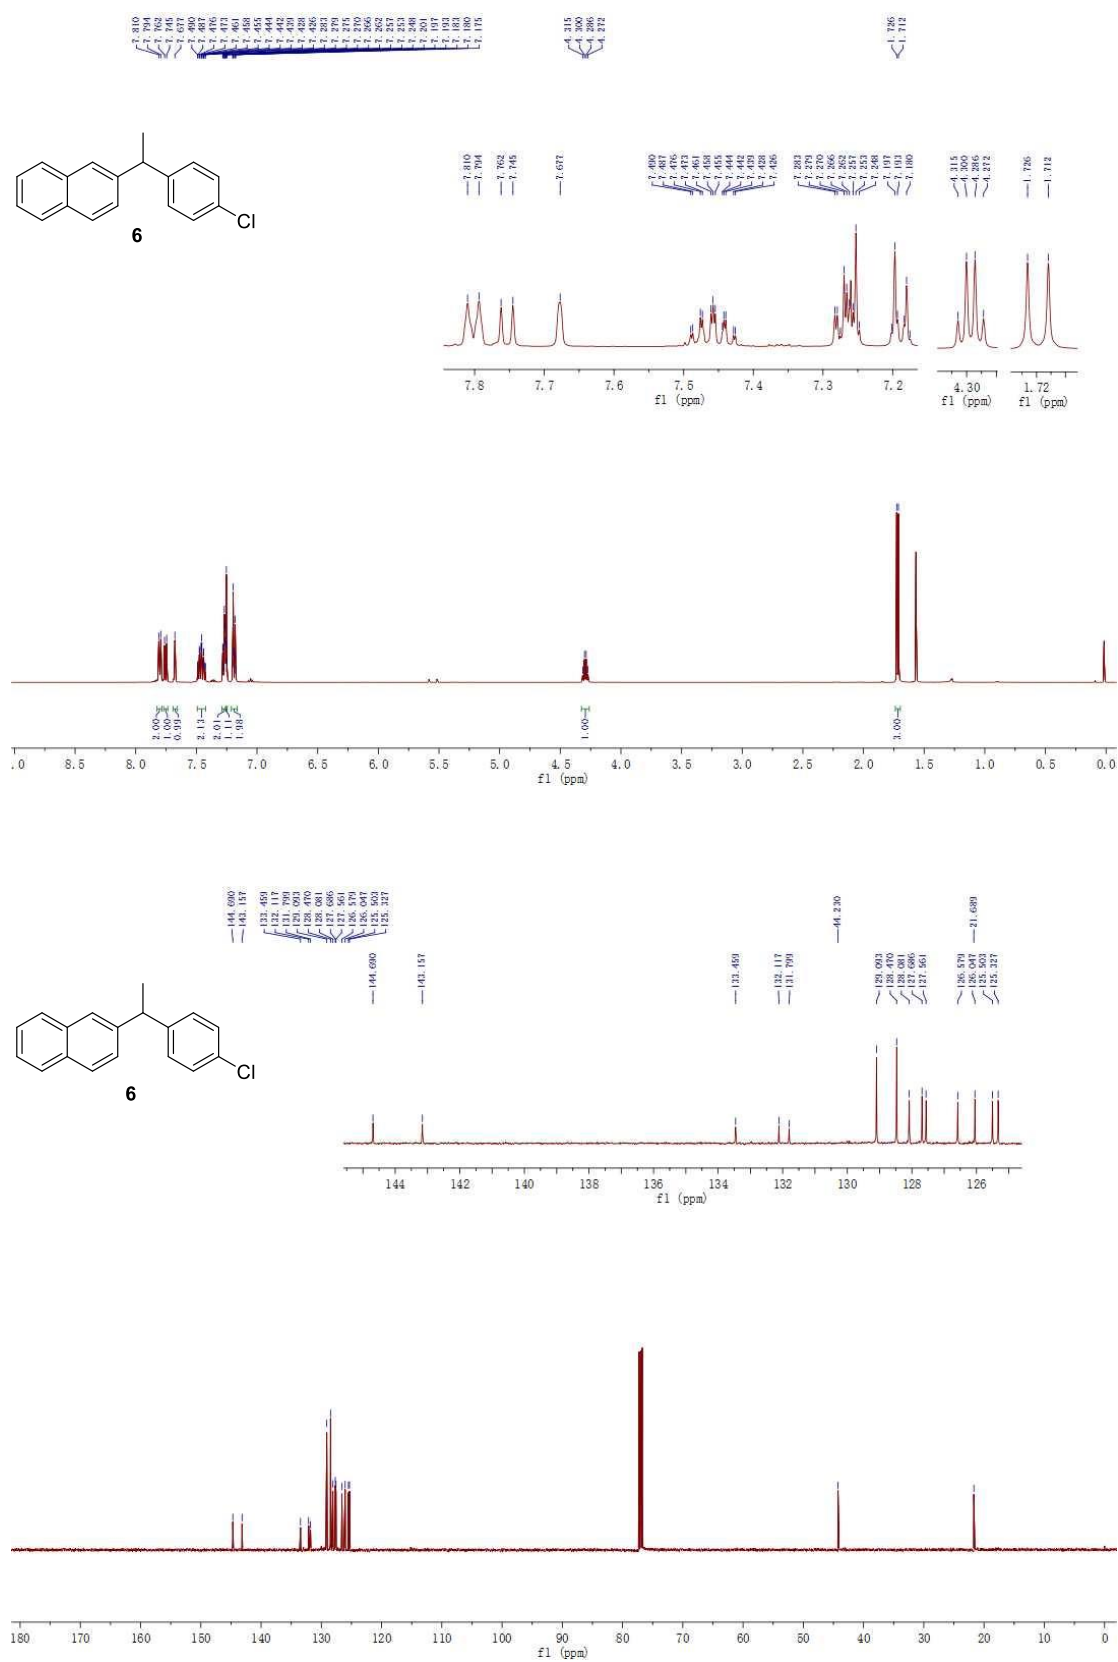



## 6. References

- (1) Stokes, B. J.; Liao, L.; de Andrade, A. M.; Wang, Q.; Sigman, M. S. *Org. Lett.* **2014**, *16*, 4666.
- (2) Di Giuseppe, A.; Castarlenas, R.; Pérez-Torrente, J. J.; Lahoz, F. J.; Polo, V.; Oro, L. A. *Angew. Chem. Int. Ed.* **2011**, *50*, 3938.
- (3) Lautens, M.; Roy, A.; Fukuoka, K.; Fagnou, K.; Martín-Matute, B. *J. Am. Chem. Soc.* **2001**, *123*, 5358.
- (4) Duan, H.; Meng, L.; Bao, D.; Zhang, H.; Li, Y.; Lei, A. *Angew. Chem. Int. Ed.* **2010**, *49*, 6387.
